# Supplementary material for: Selectivity-switchable construction of benzo-fused polycyclic compounds through a gold-catalyzed reaction of enyne-lactone
Source: Royal Society of Chemistry journal article supplement (doi:10.1039/c7cc09786g), 2018-01-01

## Electronic Supplementary Information

### Selectivity-switchable construction of benzo-fused polycyclic compounds through a gold-catalyzed reaction of enyne-lactone

Kui Luo,<sup>a</sup> Ling Zhang,<sup>a</sup> Huanfeng Jiang,<sup>a</sup> Lianfen Chen<sup>\*a</sup> and Shifa Zhu<sup>\*ab</sup>

<sup>a</sup> Key Laboratory of Functional Molecular Engineering of Guangdong Province, School of Chemistry and Chemical Engineering, South China University of Technology, Guangzhou, 510640, P. R. China

<sup>b</sup> State Key Laboratory of Elemento-Organic Chemistry, Nankai University, Tianjin 300071, P. R. China

Corresponding author: [zhufsf@scut.edu.cn](mailto:zhufsf@scut.edu.cn); [chenlf@scut.edu.cn](mailto:chenlf@scut.edu.cn)

#### Table of contents

|                                                                      |    |
|----------------------------------------------------------------------|----|
| 1. Experimental procedures and spectroscopic data .....              | 2  |
| 1.1 Optimization of Reaction Conditions <sup>a</sup> .....           | 2  |
| 1.2 General information.....                                         | 3  |
| 1.3 Preparation of substrates <b>1</b> .....                         | 3  |
| 1.4 General procedure for the synthesis of <b>3</b> .....            | 9  |
| 1.5 Gram-scale reaction.....                                         | 18 |
| 1.6 General procedure for derivatization reaction of <b>3a</b> ..... | 18 |
| 2. References: .....                                                 | 20 |
| 3. X-ray diffraction analysis .....                                  | 21 |
| 3.1 Crystal data and structure refinement for <b>3a</b> .....        | 21 |
| 3.2 Crystal data and structure refinement for <b>3l</b> .....        | 22 |
| 3.3 Crystal data and structure refinement for <b>3aa</b> .....       | 23 |
| 4. Copies of NMR spectra .....                                       | 24 |

## 1. Experimental procedures and spectroscopic data

### 1.1 Optimization of Reaction Conditions <sup>a</sup>

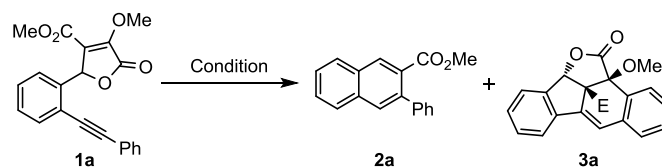

| Entry           | Cat.                                   | Add.                    | T (°C)     | Yield <sup>b</sup> (%) |                       |
|-----------------|----------------------------------------|-------------------------|------------|------------------------|-----------------------|
|                 |                                        |                         |            | 2a                     | 3a                    |
| 1               | Ph <sub>3</sub> PAuCl                  | AgSbF <sub>6</sub>      | 80         | 74                     | trace                 |
| 2               | Ph <sub>3</sub> PAuCl                  | AgBF <sub>4</sub>       | 80         | 40                     | 6                     |
| 3               | Ph <sub>3</sub> PAuCl                  | AgBF <sub>4</sub>       | 100        | 11                     | trace                 |
| 4               | ( <i>p</i> -F-Ph) <sub>3</sub> PAuCl   | AgBF <sub>4</sub>       | 80         | 23                     | trace                 |
| 5               | ( <i>p</i> -OMe-Ph) <sub>3</sub> PAuCl | AgBF <sub>4</sub>       | 80         | 13                     | trace                 |
| 6               | JohnPhosAuCl                           | AgBF <sub>4</sub>       | 80         | 23                     | trace                 |
| 7               | IMesAuCl                               | AgBF <sub>4</sub>       | 80         | trace                  | trace                 |
| 8               | SIMesAuCl                              | AgBF <sub>4</sub>       | 80         | trace                  | trace                 |
| 9               | IPrAuCl                                | AgBF <sub>4</sub>       | 80         | 58                     | 42                    |
| 10              | SIPrAuCl                               | AgBF <sub>4</sub>       | 80         | 22                     | 50                    |
| 11              | SIPrAuCl                               | AgSbF <sub>6</sub>      | 80         | 26                     | 39                    |
| 12              | SIPrAuCl                               | AgNTf <sub>2</sub>      | 80         | trace                  | trace                 |
| 13              | SIPrAuCl                               | AgOTf                   | 80         | 41                     | 31                    |
| 14 <sup>d</sup> | SIPrAuCl                               | AgBF <sub>4</sub>       | 80         | 33                     | 44                    |
| 15 <sup>e</sup> | SIPrAuCl                               | AgBF <sub>4</sub>       | 80         | 11                     | trace                 |
| 16 <sup>f</sup> | SIPrAuCl                               | AgBF <sub>4</sub>       | 80         | 18                     | trace                 |
| 17 <sup>g</sup> | SIPrAuCl                               | AgBF <sub>4</sub>       | 80         | nr                     | nr                    |
| 18              | SIPrAuCl                               | AgBF <sub>4</sub>       | 60         | 41                     | 18                    |
| <b>19</b>       | <b>SIPrAuCl</b>                        | <b>AgBF<sub>4</sub></b> | <b>100</b> | <b>13</b>              | <b>70<sup>c</sup></b> |
| 20 <sup>h</sup> | SIPrAuCl                               | AgBF <sub>4</sub>       | 100        | 14                     | 69                    |
| 21 <sup>i</sup> | SIPrAuCl                               | AgBF <sub>4</sub>       | 100        | 12                     | 68                    |
| 22 <sup>j</sup> | SIPrAuCl                               | AgBF <sub>4</sub>       | 100        | 8                      | 42                    |
| 23 <sup>k</sup> | SIPrAuCl                               | AgBF <sub>4</sub>       | 100        | 7                      | 60                    |
| 24              | -                                      | AgBF <sub>4</sub>       | 100        | 7                      | 12                    |
| 25 <sup>l</sup> | -                                      | AgBF <sub>4</sub>       | 100        | nr                     | nr                    |
| 26              | -                                      | -                       | 100        | nr                     | nr                    |
| 27              | Sc(OTf) <sub>3</sub>                   | -                       | 100        | 15                     | nd                    |
| 28              | Bi(OTf) <sub>3</sub>                   | -                       | 100        | 20                     | nd                    |
| 29              | Cu(OTf) <sub>2</sub>                   | -                       | 100        | trace                  | nd                    |
| 30              | Yb(OTf) <sub>3</sub>                   | -                       | 100        | nr                     | nr                    |
| 31              | Zn(OTf) <sub>2</sub>                   | -                       | 100        | nr                     | nr                    |
| 32              | ZnI <sub>2</sub>                       | -                       | 100        | nr                     | nr                    |
| 33              | CuCl                                   | -                       | 100        | nr                     | nr                    |
| 34              | TfOH                                   | -                       | 100        | complex                | complex               |
| 35              | Tf <sub>2</sub> NH                     | -                       | 100        | trace                  | nd                    |

<sup>a</sup> Unless otherwise noted, the reaction was performed with **1** (0.2 mmol), SIPrAuCl (5 mol%) and AgBF<sub>4</sub> (5 mol%) in DCE (2 mL) at 100 °C under N<sub>2</sub> for 12 h, E = CO<sub>2</sub>Me. <sup>b</sup> The yield was determined by <sup>1</sup>H NMR using 1-methyl-4-nitrobenzene as an internal standard. <sup>c</sup> Isolated yield. <sup>d</sup> CH<sub>2</sub>Cl<sub>2</sub> as solvent. <sup>e</sup> THF as solvent. <sup>f</sup> Toluene as solvent. <sup>g</sup> CH<sub>3</sub>CN as solvent. <sup>h</sup> The AgCl precipitates was filtered off by a short flash column chromatography. <sup>i</sup> The reaction was performed in the dark condition. <sup>j</sup> SIPrAuCl (1 mol%) and AgBF<sub>4</sub> (1 mol%). <sup>k</sup> SIPrAuCl (2 mol%) and AgBF<sub>4</sub> (2 mol%). <sup>l</sup> PTSA (20 mol%) and AgBF<sub>4</sub> (5 mol%).

## 1.2 General information

All reactions were carried out under an inert atmosphere of dry N<sub>2</sub> in Schlenk tube. <sup>1</sup>H, <sup>13</sup>C, <sup>19</sup>F NMR spectra were recorded on a Bruker AVANCE 400 (400 MHz for <sup>1</sup>H; 100 MHz for <sup>13</sup>C; 376 MHz for <sup>19</sup>F), <sup>1</sup>H NMR and <sup>13</sup>C NMR chemical shifts were determined relative to internal standard TMS at  $\delta$  0.0 and <sup>19</sup>F NMR chemical shifts were determined relative to CFCI<sub>3</sub> as external standard. Chemical shifts ( $\delta$ ) are reported in ppm, and coupling constants (*J*) are in Hertz (Hz). The following abbreviations were used to explain the multiplicities: s = singlet, d = doublet, t = triplet, q = quartet, m = multiplet, br = broad. Infrared (IR) spectra are recorded on a Nicolet 210 spectrophotometer and were recorded in potassium bromide (KBr) pellet. Mass spectra (MS) were obtained using ESI mass spectrometer. Melting points were determined using a hot stage apparatus. All reagents were used as received from commercial sources, unless specified otherwise, or prepared as described in the literature.

## 1.3 Preparation of substrates 1

### 1.3.1 General procedure for 1a – 1y

The substrates **1a** – **1y** were synthesized according to our reported procedures and the data of the following enyne-lactone **1** were reported in our previous work.<sup>1</sup>

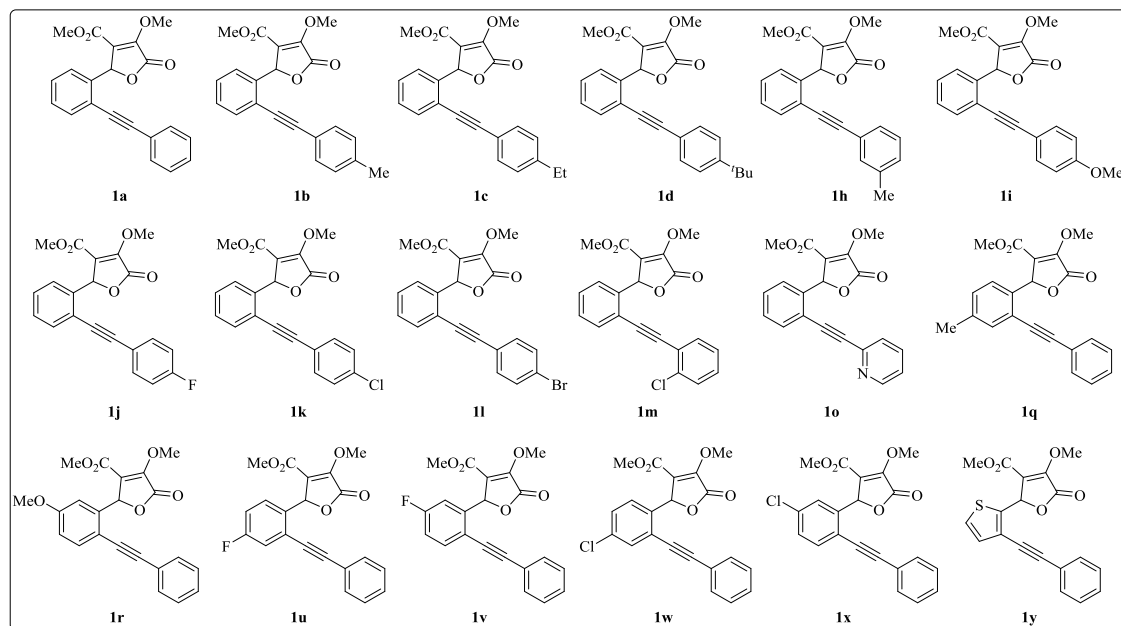

### Methyl 4-methoxy-5-oxo-2-(2-(o-tolylethynyl)phenyl)-2,5-dihydrofuran-3-carboxylate (**1e**)

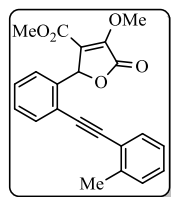

Yellow viscous oil, purified by chromatography (petroleum/ethyl acetate = 5/1), *R*<sub>f</sub> = 0.3, 210 mg, yield = 43% (2 steps); <sup>1</sup>H NMR (400 MHz, CDCl<sub>3</sub>)  $\delta$  7.60 (d, *J* = 7.5 Hz, 1H), 7.53 (d, *J* = 7.5 Hz, 1H), 7.39 – 7.31 (m, 2H), 7.26 – 7.22 (m, 2H), 7.19 (d, *J* = 7.3 Hz, 2H), 6.61 (s, 1H), 4.25 (s, 3H), 3.66 (s, 3H), 2.52 (s, 3H); <sup>13</sup>C NMR (100 MHz, CDCl<sub>3</sub>)  $\delta$  166.8, 161.4, 148.8, 140.3, 135.5, 133.2, 132.1, 129.6, 129.4, 128.8, 128.7, 127.1, 125.8, 124.1, 122.6, 121.8, 94.2, 90.2, 78.1, 60.2, 52.1, 20.9; IR (KBr, cm<sup>-1</sup>) 3667, 3544, 3061, 3022, 2954, 2864, 2213, 1935, 1773, 1720, 1657, 1600, 1571, 1493, 1451, 1436, 1390,

1334, 1304, 1229, 1174, 1114, 1025, 994, 910, 882, 836, 759, 737, 716, 639, 624, 586, 562, 534, 500, 451; **HRMS** (ESI) Calcd for  $C_{22}H_{19}O_5$  ( $M+H$ )<sup>+</sup> 363.1227, found 363.1230.

**Methyl 4-methoxy-2-(2-((2-methoxyphenyl)ethynyl)phenyl)-5-oxo-2,5-dihydrofuran-3-carboxylate (1f)**

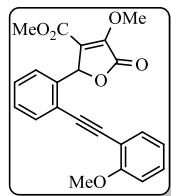

Yellow viscous oil, purified by chromatography (petroleum/ethyl acetate = 4/1),  $R_f$  = 0.3, 250 mg, yield = 40% (2 steps); **<sup>1</sup>H NMR** (400 MHz,  $CDCl_3$ )  $\delta$  7.62 – 7.58 (m, 1H), 7.50 (dd,  $J$  = 7.6, 1.6 Hz, 1H), 7.37 – 7.28 (m, 3H), 7.18 – 7.14 (m, 1H), 6.94 (t,  $J$  = 7.5 Hz, 1H), 6.90 (d,  $J$  = 8.3 Hz, 1H), 6.72 (s, 1H), 4.26 (s, 3H), 3.88 (s, 3H), 3.64 (s, 3H); **<sup>13</sup>C NMR** (100 MHz,  $CDCl_3$ )  $\delta$  166.9, 161.5, 160.3, 148.7, 135.7, 133.3, 132.9, 130.3, 129.3, 128.6, 126.8, 124.3, 122.1, 120.6, 112.2, 110.8, 91.7, 90.5, 78.0, 60.3, 55.9, 52.1; **IR** (KBr,  $cm^{-1}$ ) 3861, 3850, 3742, 3732, 3708, 3687, 3674, 3647, 3011, 2954, 2839, 2351, 2215, 1770, 1722, 1658, 1594, 1573, 1556, 1497, 1483, 1455, 1435, 1390, 1277, 1230, 1208, 1160, 1113, 1045, 1022, 994, 882, 835, 755, 663, 609, 524, 441; **HRMS** (ESI) Calcd for  $C_{22}H_{19}O_6$  ( $M+H$ )<sup>+</sup> 379.1176, found 379.1178.

**Methyl 2-(2-((3,5-dimethylphenyl)ethynyl)phenyl)-4-methoxy-5-oxo-2,5-dihydrofuran-3-carboxylate (1g)**

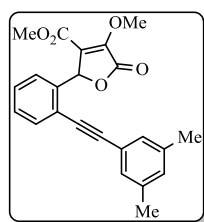

Yellow viscous oil, purified by chromatography (petroleum/ethyl acetate = 5/1),  $R_f$  = 0.4, 270 mg, yield = 38% (2 steps); **<sup>1</sup>H NMR** (400 MHz,  $CDCl_3$ )  $\delta$  7.57 (d,  $J$  = 7.2 Hz, 1H), 7.38 – 7.29 (m, 2H), 7.19 (d,  $J$  = 4.8 Hz, 3H), 6.99 (s, 1H), 6.56 (s, 1H), 4.26 (s, 3H), 3.66 (s, 3H), 2.32 (s, 6H); **<sup>13</sup>C NMR** (100 MHz,  $CDCl_3$ )  $\delta$  166.9, 161.5, 148.8, 138.1, 135.5, 133.3, 130.7, 129.4, 128.6, 127.3, 123.9, 122.4, 121.9, 95.6, 85.7, 78.3, 60.3, 52.1, 21.2; **IR** (KBr,  $cm^{-1}$ ) 3749, 3675, 3544, 3004, 2954, 2920, 2863, 2353, 2208, 1939, 1774, 1721, 1657, 1598, 1490, 1450, 1389, 1227, 1173, 1115, 1025, 995, 908, 851, 760, 689, 639, 624, 577, 560, 528, 473, 440; **HRMS** (ESI) Calcd for  $C_{23}H_{21}O_5$  ( $M+H$ )<sup>+</sup> 377.1384, found 377.1385.

**Methyl 4-methoxy-2-(2-((4-nitrophenyl)ethynyl)phenyl)-5-oxo-2,5-dihydrofuran-3-carboxylate (1n)**

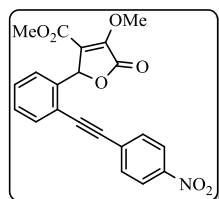

Yellow solid, m.p. = 167–168°C, purified by chromatography (petroleum/ethyl acetate = 4/1),  $R_f$  = 0.2, 380 mg, yield = 48% (2 steps); **<sup>1</sup>H NMR** (400 MHz,  $CDCl_3$ )  $\delta$  8.25 – 8.22 (m, 2H), 7.72 – 7.68 (m, 2H), 7.64 – 7.60 (m, 1H), 7.44 – 7.39 (m, 2H), 7.29 – 7.27 (m, 1H), 6.45 (s, 1H), 4.26 (s, 3H), 3.68 (s, 3H); **<sup>13</sup>C NMR** (100 MHz,  $CDCl_3$ )  $\delta$  166.9, 161.4, 149.0, 147.4, 135.9, 133.9, 132.6, 129.7, 129.6, 128.1, 123.8, 122.2, 121.6, 93.2, 91.5, 78.5, 60.4, 52.3; **IR** (KBr,  $cm^{-1}$ ) 3228, 2991, 1765, 1647, 1631, 1377, 1242, 1108, 1053, 913, 852, 743, 643; **HRMS** (ESI) Calcd for  $C_{21}H_{15}NNaO_7$  ( $M+Na$ )<sup>+</sup> 416.0741, found 416.0742.

The substrate **1p** was synthesized through the following synthetic route.

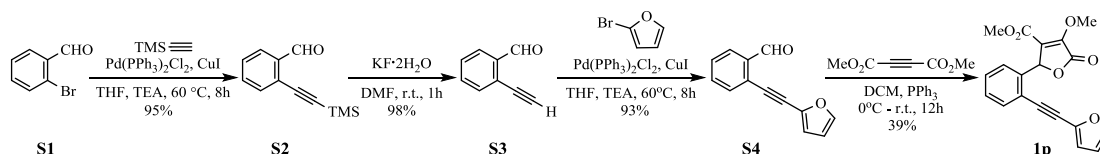

### Step 1:

To a magnetically stirred solution of **S1** (0.92 g, 5 mmol, 1.0 eq) in THF was added Pd(PPh<sub>3</sub>)<sub>2</sub>Cl<sub>2</sub> (3.0 mol %) and CuI (5.0 mol %) under nitrogen atmosphere. After stirred for 5 min, the trimethylsilylacetylene (0.6 g, 6 mmol, 1.2 eq) and NEt<sub>3</sub> were added. The resulting mixture was stirred at 60 °C for 8 h. After the reaction was finished, the mixture was filtered by short silica, then the solvent was evaporated under reduced pressure and the residue was purified by flash chromatography on silica gel using petroleum ether and ethyl acetate (PE/EA = 30/1) as the eluent to afford **S2** (0.96 g, 4.75 mmol).

### Step 2:

To a magnetically stirred solution of **S2** (0.96 g, 4.75 mmol, 1.0 eq) in DMF was added KF·2H<sub>2</sub>O (1.34 g, 14.25 mmol, 3.0 eq), the mixture was stirred at room temperature for 1 h. After the reaction was finished, the resultant mixture was extracted with ethyl acetate. The combined organic extracts were washed with brine, and the solvent was removed under reduced pressure. The residue was purified by flash chromatography on silica using petroleum ether and ethyl acetate (PE/EA = 30/1) as the eluent to give **S3** (605 mg, 4.65 mmol).

### Step 3:

To a magnetically stirred solution of **S3** (605 mg, 4.65 mmol, 1.0 eq) in THF was added Pd(PPh<sub>3</sub>)<sub>2</sub>Cl<sub>2</sub> (3.0 mol %) and CuI (5.0 mol %) under nitrogen atmosphere. Then, the 2-bromofuran (0.81 g, 5.6 mmol, 1.2 eq) and NEt<sub>3</sub> were added. The resulting mixture was stirred at 60 °C for 8 h. After the reaction was finished, the mixture was filtered by short silica, then the solvent was evaporated under reduced pressure and the residue was purified by flash chromatography on silica gel using petroleum ether and ethyl acetate (PE/EA = 20/1) as the eluent to afford **S4** (0.85 g, 4.32 mmol).

### Step 4:

Procedure for the synthesis of **1p** was identical to the literature.<sup>1</sup>

### Methyl 2-(2-(furan-2-ylethynyl)phenyl)-4-methoxy-5-oxo-2,5-dihydrofuran-3-carboxylate (**1p**)

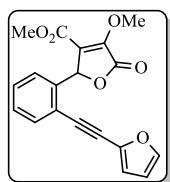

Yellow viscous oil, purified by chromatography (petroleum/ethyl acetate = 5/1), *R<sub>f</sub>* = 0.2, 370 mg, yield = 34% (4 steps); <sup>1</sup>H NMR (400 MHz, CDCl<sub>3</sub>) δ 7.58 – 7.55 (m, 1H), 7.43 (s, 1H), 7.37 – 7.32 (m, 2H), 7.22 – 7.17 (m, 1H), 6.72 (d, *J* = 3.4 Hz, 1H), 6.45 (s, 1H), 6.44 – 6.42 (m, 1H), 4.28 (s, 3H), 3.65 (s, 3H); <sup>13</sup>C NMR (100 MHz, CDCl<sub>3</sub>) δ 166.8, 161.4, 148.9, 144.1, 136.7, 135.5, 133.3, 129.4, 129.1, 127.7, 122.5, 121.5, 116.2, 111.3, 90.3, 85.1, 78.2, 60.4, 52.2; IR (KBr, cm<sup>-1</sup>) 3449, 3147, 3009, 2955, 2207, 1776, 1718, 1658, 1572, 1447, 1388, 1301, 1231, 1168, 1117, 995, 930, 879, 821, 756, 594; HRMS (ESI) Calcd for C<sub>19</sub>H<sub>14</sub>NaO<sub>6</sub> (M+Na)<sup>+</sup> 361.0683, found 361.0685.

### Methyl 2-(4,5-dimethoxy-2-(phenylethynyl)phenyl)-4-methoxy-5-oxo-2,5-dihydrofuran-3-carboxylate (**1s**)

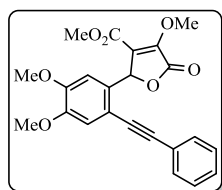

Yellow solid, m.p. = 113-114 °C, purified by chromatography (petroleum/ethyl acetate = 3/1), *R<sub>f</sub>* = 0.3, 280 mg, yield = 33% (2 steps); <sup>1</sup>H NMR (400 MHz, CDCl<sub>3</sub>) δ 7.56 – 7.51 (m, 2H), 7.38 – 7.32 (m, 3H), 7.04 (s, 1H), 6.60 (s, 1H), 6.50 (s, 1H), 4.23 (s, 3H), 3.90 (s, 3H), 3.86 (s, 3H), 3.67 (s, 3H); <sup>13</sup>C NMR (100 MHz, CDCl<sub>3</sub>) δ 166.9, 161.6, 149.8, 149.7, 148.6, 131.7, 128.6, 128.5, 128.4, 123.0, 122.0, 116.2, 115.4, 109.9, 93.8, 86.5, 78.4, 60.2, 56.2, 56.1, 52.2; IR (KBr, cm<sup>-1</sup>) 3652, 3058, 3006, 2955, 2857, 2205, 1769, 1719, 1658, 1597, 1573, 1520, 1462, 1389, 1355, 1301, 1251,

1208, 1177, 1158, 1116, 1091, 1027, 990, 911, 865, 829, 758, 735, 692, 651, 631, 566, 534, 497; **HRMS** (ESI) Calcd for C<sub>23</sub>H<sub>21</sub>O<sub>7</sub> (M+H)<sup>+</sup> 409.1282, found 409.1284.

**Methyl 4-methoxy-5-oxo-2-(6-(phenylethynyl)benzo[d][1,3]dioxol-5-yl)-2,5-dihydrofuran-3-carboxylate (1t)**

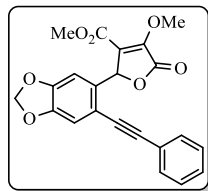

Yellow solid, m.p. = 152-153 °C, purified by chromatography (petroleum/ethyl acetate = 4/1), R<sub>f</sub> = 0.3, 350 mg, yield = 31% (2 steps); <sup>1</sup>H NMR (400 MHz, CDCl<sub>3</sub>) δ 7.54 – 7.50 (m, 2H), 7.36 – 7.33 (m, 3H), 6.99 (s, 1H), 6.60 (s, 1H), 6.54 (s, 1H), 6.00 (s, 2H), 4.25 (s, 3H), 3.69 (s, 3H); <sup>13</sup>C NMR (100 MHz, CDCl<sub>3</sub>) δ 166.6, 161.4, 148.5, 148.4, 131.5, 130.2, 128.5, 128.4, 122.8, 121.7, 117.5, 112.2, 106.8, 101.9, 93.6, 86.2, 77.8, 60.2, 52.1; **IR** (KBr, cm<sup>-1</sup>) 3119, 3011, 2950, 2897, 2361, 2319, 2247, 2181, 1777, 1717, 1658, 1598, 1495, 1379, 1239, 1122, 1041, 989, 937, 868, 775, 732, 638, 579; **HRMS** (ESI) Calcd for C<sub>22</sub>H<sub>16</sub>NaO<sub>7</sub> (M+Na)<sup>+</sup> 415.0788, found 415.0792.

**1.3.2 General procedure for 1aa – 1ah**

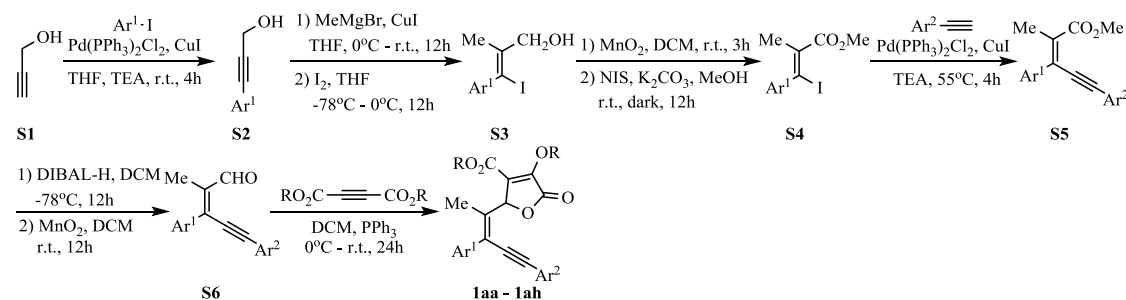

**Step 1:**

To a magnetically stirred solution of appropriate iodobenzene (1.0 eq) in THF were added Pd(PPh<sub>3</sub>)<sub>2</sub>Cl<sub>2</sub> (3.0 mol %) and CuI (5.0 mol %) under nitrogen atmosphere. After stirred for 5 min, the **S1** (1.0 eq) and NEt<sub>3</sub> were added. The resulting mixture was stirred at room temperature for 4 h. After the reaction was finished, the mixture was filtered by short silica, then the solvent was evaporated under reduced pressure and the residue was purified by flash chromatography on silica gel using petroleum ether and ethyl acetate (PE/EA = 5/1) as the eluent to afford the desired product **S2**.

**Step 2:**

To a solution of **S2** (1.0 eq) and CuI (5.0 mol %) in THF (20 mL) was added a 3.0 M MeMgBr (2.5 eq) at 0 °C. Upon complete addition of Grignard reagent, the mixture was allowed up to room temperature and vigorously stirred for the desired period of time. The dark green mixture was then cooled to -78 °C and then added a solution of I<sub>2</sub> (2.0 eq) in THF (15 mL). After warming up to room temperature and stirring at room temperature for 1 h, the resulting reaction mixture was cooled to 0 °C and quenched with sat. NH<sub>4</sub>Cl. The mixture was warmed to room temperature and extracted with EtOAc, washed with brine, dried over Na<sub>2</sub>SO<sub>4</sub>, filtered, and concentrated under reduced pressure. The residue was purified by flash chromatography on silica using petroleum ether and ethyl acetate (PE/EA = 15/1) as the eluent to give **S3** as a yellow oil.

**Step 3:**

To a magnetically stirred solution of **S3** (1.0 eq) in DCM was added MnO<sub>2</sub> (10 eq). The resulting mixture was stirred at room temperature for 3 h. After the reaction was finished, the mixture was filtered by short silica, then the solvent was evaporated under reduced pressure and the crude material

was used without any further purification. NIS (2.5 eq) and  $K_2CO_3$  (2.5 eq) were added to a solution of the crude alcohol (1.0 eq) in MeOH. Then the reaction mixture was stirred in dark place at room temperature for 12h. Water and  $Na_2S_2O_3$  were added to destroy any remaining NIS or hypoiodite species. The resultant mixture was extracted with 3 X 5 mL ether. The combined organic extracts were washed with brine, and the solvent was removed under reduced pressure. The residue was purified by flash chromatography on silica using petroleum ether and ethyl acetate (PE/EA = 100/1) as the eluent to give **S4** as a colourless oil.

#### Step 4:

To a magnetically stirred solution of **S4** (1.0 eq) in THF was added  $Pd(PPh_3)_2Cl_2$  (2.0 mol %) and CuI (1.0 mol %) under nitrogen atmosphere. After stirred for 5 min, the phenylacetylene (1.2 eq) and  $NEt_3$  were added. The resulting mixture was stirred at 55 °C for 4 h. After the reaction was finished, the mixture was filtered by short silica, then the solvent was evaporated under reduced pressure and the residue was purified by flash chromatography on silica gel using petroleum ether and ethyl acetate (PE/EA = 20/1) as the eluent to afford **S5**.

#### Step 5:

Procedure for the synthesis of **S6** was identical to the literature.<sup>2</sup>

#### Step 6:

To a magnetically stirred solution of **S6** (1.0 eq) in dry DCM was added triphenylphosphine (1.2 eq) at 0 °C under nitrogen atmosphere. After stirred for 5 min, the DCM solution of dimethyl acetylenedicarboxylate (1.2 eq) or diethyl acetylenedicarboxylate (1.2 eq) was added dropwise. Then, the mixture was allowed to stand at room temperature for 24 h. After the reaction was finished, the solvent was removed under reduced pressure and the residue was purified by flash chromatography on silica gel using petroleum ether and ethyl acetate (PE/EA = 10/1) as the eluent to afford the desired product **1aa - 1ah**.

#### Methyl (Z)-2-(3,5-diphenylpent-2-en-4-yn-2-yl)-4-methoxy-5-oxo-2,5-dihydrofuran-3-carboxylate (**1aa**)

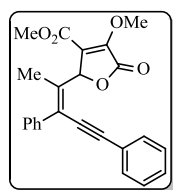

Yellow viscous oil, purified by chromatography (petroleum/ethyl acetate = 5/1),  $R_f$  = 0.4, 160 mg, yield = 8% (6 steps);  $^1H$  NMR (400 MHz,  $CDCl_3$ )  $\delta$  7.46 – 7.29 (m, 10H), 6.65 (s, 1H), 4.27 (s, 3H), 3.84 (s, 3H), 1.59 (s, 3H);  $^{13}C$  NMR (100 MHz,  $CDCl_3$ )  $\delta$  166.8, 161.7, 148.7, 138.2, 136.6, 131.6, 128.9, 128.7, 128.5, 128.5, 128.0, 127.3, 123.1, 121.3, 96.2, 87.8, 79.8, 60.3, 52.3, 12.9; IR (KBr,  $cm^{-1}$ ) 2952, 1777, 1721, 1658, 1446, 1383, 1300, 1224, 1118, 990, 761, 697; HRMS (ESI) Calcd for  $C_{24}H_{20}NaO_5$  ( $M+Na$ )<sup>+</sup> 411.1203, found 411.1208.

#### Ethyl (Z)-2-(3,5-diphenylpent-2-en-4-yn-2-yl)-4-ethoxy-5-oxo-2,5-dihydrofuran-3-carboxylate (**1ab**)

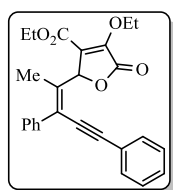

Yellow viscous oil, purified by chromatography (petroleum/ethyl acetate = 5/1),  $R_f$  = 0.4, 130 mg, yield = 6% (6 steps);  $^1H$  NMR (400 MHz,  $CDCl_3$ )  $\delta$  7.46 – 7.29 (m, 10H), 6.66 (s, 1H), 4.75 – 4.58 (m, 2H), 4.36 – 4.21 (m, 2H), 1.60 (s, 3H), 1.43 (t,  $J$  = 7.0 Hz, 3H), 1.31 (t,  $J$  = 7.1 Hz, 3H);  $^{13}C$  NMR (100 MHz,  $CDCl_3$ )  $\delta$  167.0, 161.3, 148.4, 138.2, 136.9, 131.5, 128.9, 128.6, 128.5, 128.4, 128.0, 127.2, 123.1, 121.9, 96.1, 88.0, 79.9, 69.0, 61.5, 15.5, 14.3, 12.8; IR (KBr,  $cm^{-1}$ ) 2985, 1778, 1719, 1654, 1482, 1443, 1383, 1298, 1215, 1119, 1007, 761, 698, 616, 523; HRMS (ESI) Calcd for  $C_{26}H_{24}NaO_5$  ( $M+Na$ )<sup>+</sup> 439.1516,

found 439.1523.

**Methyl (Z)-4-methoxy-5-oxo-2-(5-phenyl-3-(p-tolyl)pent-2-en-4-yn-2-yl)-2,5-dihydrofuran-3-carboxylate (1ac)**

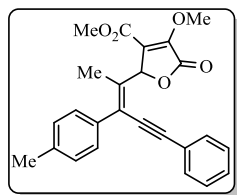

Yellow viscous oil, purified by chromatography (petroleum/ethyl acetate = 5/1),  $R_f$  = 0.4, 121 mg, yield = 10% (6 steps);  $^1\text{H NMR}$  (400 MHz,  $\text{CDCl}_3$ )  $\delta$  7.48 – 7.44 (m, 2H), 7.35 – 7.32 (m, 3H), 7.29 (d,  $J$  = 7.9 Hz, 2H), 7.22 (d,  $J$  = 8.1 Hz, 2H), 6.66 (s, 1H), 4.29 (s, 3H), 3.85 (s, 3H), 2.40 (s, 3H), 1.62 (s, 3H);  $^{13}\text{C NMR}$  (100 MHz,  $\text{CDCl}_3$ )  $\delta$  166.8, 161.7, 148.7, 137.9, 136.2, 135.3, 131.6, 129.2, 128.8, 128.6, 128.5, 127.3, 123.2, 121.4, 95.9, 88.0, 79.9, 60.3, 52.3, 21.4, 12.9; **IR** (KBr,  $\text{cm}^{-1}$ ) 3852, 3742, 2952, 1777, 1719, 1659, 1502, 1447, 1382, 1301, 1223, 1117, 989, 910, 823, 762, 691, 516; **HRMS** (ESI) Calcd for  $\text{C}_{25}\text{H}_{22}\text{NaO}_5$  ( $\text{M}+\text{Na}$ ) $^+$  425.1359, found 425.1363.

**Methyl (Z)-2-(3-(4-(tert-butyl)phenyl)-5-phenylpent-2-en-4-yn-2-yl)-4-methoxy-5-oxo-2,5-dihydrofuran-3-carboxylate (1ad)**

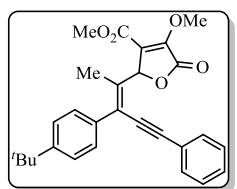

Yellow viscous oil, purified by chromatography (petroleum/ethyl acetate = 5/1),  $R_f$  = 0.4, 185 mg, yield = 15% (6 steps);  $^1\text{H NMR}$  (400 MHz,  $\text{CDCl}_3$ )  $\delta$  7.47 – 7.40 (m, 4H), 7.34 – 7.29 (m, 5H), 6.66 (s, 1H), 4.27 (s, 3H), 3.83 (s, 3H), 1.63 (s, 3H), 1.35 (s, 9H);  $^{13}\text{C NMR}$  (100 MHz,  $\text{CDCl}_3$ )  $\delta$  166.8, 161.7, 151.1, 148.7, 136.2, 135.1, 131.6, 128.7, 128.6, 128.5, 127.2, 125.3, 123.2, 121.4, 95.9, 88.0, 80.0, 60.3, 52.3, 34.8, 31.4, 12.9; **IR** (KBr,  $\text{cm}^{-1}$ ) 3852, 3741, 3680, 2958, 1777, 1717, 1659, 1448, 1389, 1224, 1116, 989, 910, 837, 760, 693, 587; **HRMS** (ESI) Calcd for  $\text{C}_{28}\text{H}_{28}\text{NaO}_5$  ( $\text{M}+\text{Na}$ ) $^+$  467.1829, found 467.1834.

**Methyl (Z)-4-methoxy-2-(3-(4-methoxyphenyl)-5-phenylpent-2-en-4-yn-2-yl)-5-oxo-2,5-dihydrofuran-3-carboxylate (1ae)**

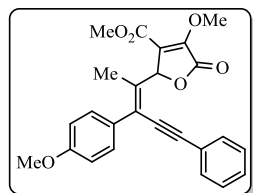

Yellow viscous oil, purified by chromatography (petroleum/ethyl acetate = 5/1),  $R_f$  = 0.3, 120 mg, yield = 9% (6 steps);  $^1\text{H NMR}$  (400 MHz,  $\text{CDCl}_3$ )  $\delta$  7.46 – 7.42 (m, 2H), 7.33 – 7.30 (m, 5H), 6.94 – 6.90 (m, 2H), 6.64 (s, 1H), 4.26 (s, 3H), 3.83 (s, 6H), 1.61 (s, 3H);  $^{13}\text{C NMR}$  (100 MHz,  $\text{CDCl}_3$ )  $\delta$  166.8, 161.7, 159.3, 148.7, 135.8, 131.5, 130.4, 130.2, 128.6, 128.4, 126.8, 123.1, 121.4, 113.8, 95.8, 88.0, 79.9, 60.3, 55.4, 52.3, 12.9; **IR** (KBr,  $\text{cm}^{-1}$ ) 3835, 3742, 2952, 1776, 1718, 1656, 1608, 1507, 1448, 1386, 1239, 1116, 1029, 987, 833, 761, 690; **HRMS** (ESI) Calcd for  $\text{C}_{25}\text{H}_{22}\text{NaO}_6$  ( $\text{M}+\text{Na}$ ) $^+$  441.1309, found 441.1316.

**Methyl (Z)-2-(3-(4-chlorophenyl)-5-phenylpent-2-en-4-yn-2-yl)-4-methoxy-5-oxo-2,5-dihydrofuran-3-carboxylate (1af)**

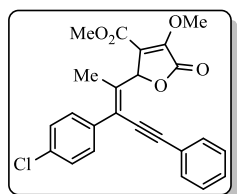

Yellow viscous oil, purified by chromatography (petroleum/ethyl acetate = 5/1),  $R_f$  = 0.4, 200 mg, yield = 17% (6 steps);  $^1\text{H NMR}$  (400 MHz,  $\text{CDCl}_3$ )  $\delta$  7.44 – 7.42 (m, 2H), 7.39 – 7.35 (m, 2H), 7.33 – 7.29 (m, 5H), 6.61 (s, 1H), 4.27 (s, 3H), 3.83 (s, 3H), 1.58 (s, 3H);  $^{13}\text{C NMR}$  (100 MHz,  $\text{CDCl}_3$ )  $\delta$  166.7, 161.6, 148.8, 137.2, 136.6, 134.0, 131.6, 130.3, 128.8, 128.7, 128.5, 126.2,

122.8, 121.1, 96.4, 87.3, 79.6, 60.3, 52.4, 12.9; **IR** (KBr,  $\text{cm}^{-1}$ ) 2953, 1778, 1720, 1659, 1488, 1447, 1386, 1301, 1226, 1117, 990, 913, 832, 763, 692, 571; **HRMS** (ESI) Calcd for  $\text{C}_{24}\text{H}_{19}\text{ClNaO}_5$  ( $\text{M}+\text{Na}$ )<sup>+</sup> 445.0813, found 445.0815.

**Methyl (Z)-2-(3-(3,5-dimethylphenyl)-5-phenylpent-2-en-4-yn-2-yl)-4-methoxy-5-oxo-2,5-dihydrofuran-3-carboxylate (1ag)**

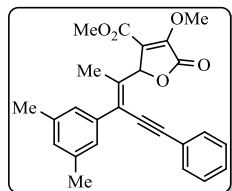

Yellow solid, m.p. = 115-116 °C, purified by chromatography (petroleum/ethyl acetate = 5/1),  $R_f$  = 0.4, 110 mg, yield = 7% (6 steps); **<sup>1</sup>H NMR** (400 MHz,  $\text{CDCl}_3$ )  $\delta$  7.47 – 7.42 (m, 2H), 7.34 – 7.29 (m, 3H), 6.96 (s, 3H), 6.64 (s, 1H), 4.27 (s, 3H), 3.85 (s, 3H), 2.34 (s, 6H), 1.58 (s, 3H); **<sup>13</sup>C NMR** (100 MHz,  $\text{CDCl}_3$ )  $\delta$  166.8, 161.7, 148.7, 138.1, 138.0, 136.4, 131.6, 129.7, 128.6, 128.4, 127.5, 126.5, 123.2, 121.4, 95.9, 87.9, 79.8, 60.3, 52.4, 21.4, 12.9; **IR** (KBr,  $\text{cm}^{-1}$ ) 3742, 2952, 1777, 1721, 1659, 1600, 1447, 1383, 1300, 1226, 1117, 989, 912, 824, 761, 697, 521; **HRMS** (ESI) Calcd for  $\text{C}_{26}\text{H}_{24}\text{NaO}_5$  ( $\text{M}+\text{Na}$ )<sup>+</sup> 439.1516, found 439.1525.

**Methyl (Z)-2-(5-(4-chlorophenyl)-3-phenylpent-2-en-4-yn-2-yl)-4-methoxy-5-oxo-2,5-dihydrofuran-3-carboxylate (1ah)**

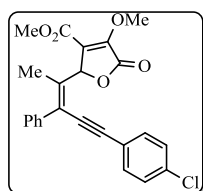

Brown yellow viscous oil, purified by chromatography (petroleum/ethyl acetate = 4/1),  $R_f$  = 0.4, 126 mg, yield = 12% (6 steps); **<sup>1</sup>H NMR** (400 MHz,  $\text{CDCl}_3$ )  $\delta$  7.42 – 7.33 (m, 7H), 7.30 – 7.27 (m, 2H), 6.59 (s, 1H), 4.27 (s, 3H), 3.84 (s, 3H), 1.59 (s, 3H); **<sup>13</sup>C NMR** (100 MHz,  $\text{CDCl}_3$ )  $\delta$  166.7, 161.6, 148.8, 138.0, 137.2, 134.7, 132.8, 128.9, 128.8, 128.5, 128.1, 127.1, 121.5, 121.2, 94.9, 88.7, 79.7, 60.3, 52.4, 13.0; **IR** (KBr,  $\text{cm}^{-1}$ ) 3742, 2953, 1778, 1720, 1658, 1488, 1447, 1387, 1301, 1225, 1115, 989, 828, 766, 703; **HRMS** (ESI) Calcd for  $\text{C}_{24}\text{H}_{19}\text{ClNaO}_5$  ( $\text{M}+\text{Na}$ )<sup>+</sup> 445.0813, found 445.0816.

## 1.4 General procedure for the synthesis of 3

### 1.4.1 General procedure for 3a – 3y

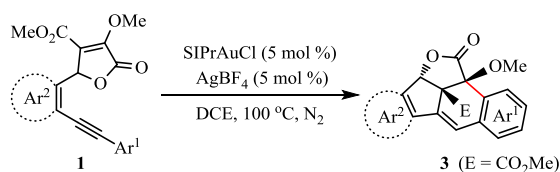

In a Schlenk tube with a magnetic bar under nitrogen atmosphere was added SIPrAuCl (5 mol %) and AgBF<sub>4</sub> (5 mol %) in 1,2-dichloroethane (DCE, 2 mL), and then the substrates **1a** – **1y** (0.2 mmol) were added. The mixture was stirred at 100 °C until the starting materials was completely consumed (monitored by TLC). After that, the mixture was filtered by short silica, the solvent was evaporated by rotary evaporator, and the residue was purified by flash column chromatography on silica gel using petroleum ether and ethyl acetate as elute to afford the pure product **3a** – **3y**.

**Methyl-2a-methoxy-2-oxo-2a,11b-dihydrobenzo[2,3]fluoreno[9,1-bc]furan-2a<sup>1</sup>(2H)-carboxylate (3a)**

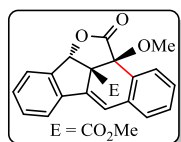

White solid, m.p. = 174 - 175 °C, purified by chromatography (petroleum/ethyl acetate = 6/1),  $R_f$  = 0.4, 49 mg, yield = 70%; **<sup>1</sup>H NMR** (400 MHz,  $\text{CDCl}_3$ )  $\delta$  7.73

(d,  $J = 7.1$  Hz, 1H), 7.67 (d,  $J = 7.5$  Hz, 1H), 7.58 (d,  $J = 7.6$  Hz, 1H), 7.46 (t,  $J = 7.5$  Hz, 1H), 7.40 – 7.32 (m, 3H), 7.25 – 7.23 (m, 1H), 6.93 (s, 1H), 6.32 (s, 1H), 3.78 (s, 3H), 3.55 (s, 3H);  $^{13}\text{C}$  NMR (100 MHz,  $\text{CDCl}_3$ )  $\delta$  172.1, 167.2, 140.2, 139.7, 135.7, 132.7, 132.5, 131.3, 129.5, 129.4, 129.1, 127.9, 127.5, 127.3, 125.2, 121.6, 84.9, 84.8, 63.7, 56.5, 53.1; **IR** (KBr,  $\text{cm}^{-1}$ ) 3856, 3547, 3065, 2953, 2840, 1933, 1782, 1734, 1605, 1483, 1466, 1453, 1435, 1344, 1298, 1261, 1194, 1157, 1082, 1058, 975, 946, 914, 886, 863, 831, 793, 762, 736, 712, 650, 623, 601, 577, 560, 542, 504; **HRMS** (ESI) Calcd for  $\text{C}_{21}\text{H}_{17}\text{O}_5$  ( $\text{M}+\text{H}$ ) $^+$  349.1071, found 349.1071.

**Methyl-2a-methoxy-4-methyl-2-oxo-2a,11b-dihydrobenzo[2,3]fluoreno[9,1-*bc*]furan-2a<sup>1</sup>(2*H*)-carboxylate (3b)**

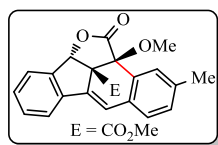

White solid, m.p. = 202 - 203 °C, purified by chromatography (petroleum/ethyl acetate = 6/1),  $R_f = 0.4$ , 54 mg, yield = 75%;  $^1\text{H}$  NMR (400 MHz,  $\text{CDCl}_3$ )  $\delta$  7.67 (d,  $J = 7.5$  Hz, 1H), 7.61 – 7.55 (m, 2H), 7.47 (t,  $J = 7.5$  Hz, 1H), 7.37 (t,  $J = 7.5$  Hz, 1H), 7.18 – 7.14 (m, 2H), 6.93 (s, 1H), 6.32 (s, 1H), 3.79 (s, 3H), 3.58 (s, 3H), 2.42 (s, 3H);  $^{13}\text{C}$  NMR (100 MHz,  $\text{CDCl}_3$ )  $\delta$  172.3, 167.3, 140.0, 139.9, 139.3, 134.6, 132.3, 131.3, 130.1, 130.0, 129.2, 128.3, 127.9, 127.3, 125.2, 121.5, 85.0, 84.9, 63.7, 56.5, 53.1, 21.9; **IR** (KBr,  $\text{cm}^{-1}$ ) 3659, 3030, 2953, 2839, 1780, 1732, 1605, 1571, 1495, 1466, 1435, 1344, 1262, 1191, 1153, 1081, 1058, 1020, 966, 916, 879, 841, 819, 795, 766, 735, 704, 661, 623, 601, 563, 519, 492, 449; **HRMS** (ESI) Calcd for  $\text{C}_{22}\text{H}_{19}\text{O}_5$  ( $\text{M}+\text{H}$ ) $^+$  363.1227, found 363.1229.

**Methyl 4-ethyl-2a-methoxy-2-oxo-2a,11b-dihydrobenzo[2,3]fluoreno[9,1-*bc*]furan-2a<sup>1</sup>(2*H*)-carboxylate (3c)**

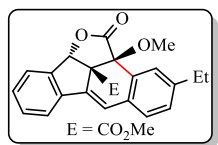

Yellow solid, m.p. = 199 - 200 °C, purified by chromatography (petroleum/ethyl acetate = 6/1),  $R_f = 0.4$ , 54 mg, yield = 72%;  $^1\text{H}$  NMR (400 MHz,  $\text{CDCl}_3$ )  $\delta$  7.67 (d,  $J = 7.5$  Hz, 1H), 7.58 (d,  $J = 7.7$  Hz, 2H), 7.47 (t,  $J = 7.4$  Hz, 1H), 7.37 (t,  $J = 7.4$  Hz, 1H), 7.22 – 7.16 (m, 2H), 6.93 (s, 1H), 6.32 (s, 1H), 3.79 (s, 3H), 3.58 (s, 3H), 2.73 (q,  $J = 7.6$  Hz, 2H), 1.30 (t,  $J = 7.6$  Hz, 3H);  $^{13}\text{C}$  NMR (100 MHz,  $\text{CDCl}_3$ )  $\delta$  172.3, 167.4, 145.4, 140.0, 139.9, 134.7, 132.3, 131.3, 130.2, 129.2, 128.7, 128.0, 127.3, 127.2, 125.2, 121.5, 85.1, 84.8, 63.7, 56.5, 53.1, 29.1, 15.2; **IR** (KBr,  $\text{cm}^{-1}$ ) 3856, 3842, 3753, 3651, 3436, 2965, 2839, 1782, 1733, 1605, 1493, 1465, 1435, 1344, 1298, 1263, 1191, 1154, 1081, 1058, 975, 917, 899, 863, 881, 829, 794, 766, 737, 704, 662, 624, 593, 503; **HRMS** (ESI) Calcd for  $\text{C}_{23}\text{H}_{21}\text{O}_5$  ( $\text{M}+\text{H}$ ) $^+$  377.1384, found 377.1383.

**Methyl 4-(tert-butyl)-2a-methoxy-2-oxo-2a,11b-dihydrobenzo[2,3]fluoreno[9,1-*bc*]furan-2a<sup>1</sup>(2*H*)-carboxylate (3d)**

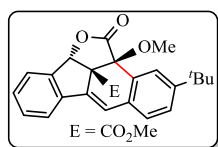

White solid, m.p. = 220 - 221 °C, purified by chromatography (petroleum/ethyl acetate = 6/1),  $R_f = 0.4$ , 57 mg, yield = 71%;  $^1\text{H}$  NMR (400 MHz,  $\text{CDCl}_3$ )  $\delta$  7.74 (d,  $J = 1.4$  Hz, 1H), 7.67 (d,  $J = 7.5$  Hz, 1H), 7.58 (d,  $J = 7.6$  Hz, 1H), 7.47 (t,  $J = 7.5$  Hz, 1H), 7.40 – 7.34 (m, 2H), 7.19 (d,  $J = 7.9$  Hz, 1H), 6.93 (s, 1H), 6.32 (s, 1H), 3.79 (s, 3H), 3.57 (s, 3H), 1.38 (s, 9H);  $^{13}\text{C}$  NMR (100 MHz,  $\text{CDCl}_3$ )  $\delta$  172.2, 167.4, 152.2, 140.0, 139.9, 134.9, 131.9, 131.3, 130.0, 129.2, 127.6, 127.3, 126.3, 125.1, 124.6, 121.5, 85.3, 84.7, 63.7, 56.4, 53.1, 35.1, 31.4; **IR** (KBr,  $\text{cm}^{-1}$ ) 3653, 2962, 2869, 2839, 1782, 1733, 1604, 1563, 1493, 1467, 1434, 1364, 1344, 1265, 1196, 1159, 1114, 1080, 1057, 966, 917, 899, 881, 826, 793, 763,

702, 661, 627, 613, 596, 505, 453; **HRMS** (ESI) Calcd for  $C_{25}H_{25}O_5$  (M+H)<sup>+</sup> 405.1697, found 405.1697.

**Methyl 2a-methoxy-6-methyl-2-oxo-2a,11b-dihydrobenzo[2,3]fluoreno[9,1-bc]furan-2a<sup>1</sup>(2H)-carboxylate (3e)**

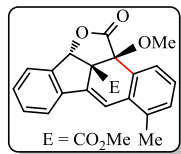

White solid, m.p. = 229 - 230 °C, purified by chromatography (petroleum/ethyl acetate = 6/1),  $R_f$  = 0.4, 51 mg, yield = 71%; **<sup>1</sup>H NMR** (400 MHz,  $CDCl_3$ )  $\delta$  7.64 (d,  $J$  = 7.5 Hz, 1H), 7.60 (d,  $J$  = 7.7 Hz, 1H), 7.55 (d,  $J$  = 7.6 Hz, 1H), 7.44 (t,  $J$  = 7.5 Hz, 1H), 7.34 (t,  $J$  = 7.5 Hz, 1H), 7.23 (d,  $J$  = 8.4 Hz, 1H), 7.16 (d,  $J$  = 7.5 Hz, 1H), 7.10 (s, 1H), 6.29 (s, 1H), 3.73 (s, 3H), 3.53 (s, 3H), 2.42 (s, 3H); **<sup>13</sup>C NMR** (100 MHz,  $CDCl_3$ )  $\delta$  172.3, 167.2, 140.2, 140.1, 135.4, 135.0, 132.7, 131.3, 131.3, 130.9, 129.4, 128.7, 127.3, 125.2, 122.5, 121.6, 85.2, 85.0, 63.2, 56.5, 53.1, 19.5; **IR** (KBr,  $cm^{-1}$ ) 3906, 3856, 3842, 3822, 3807, 3752, 3737, 3713, 3692, 3678, 3651, 3632, 3621, 3040, 2953, 2838, 1978, 1940, 1775, 1732, 1579, 1493, 1468, 1434, 1382, 1344, 1276, 1259, 1199, 1158, 1131, 1099, 1063, 1032, 989, 969, 915, 880, 824, 792, 765, 707, 653, 623, 605, 573, 538, 511, 477, 427; **HRMS** (ESI) Calcd for  $C_{22}H_{19}O_5$  (M+H)<sup>+</sup> 363.1227, found 363.1229.

**Methyl 2a,6-dimethoxy-2-oxo-2a,11b-dihydrobenzo[2,3]fluoreno[9,1-bc]furan-2a<sup>1</sup>(2H)-carboxylate (3f)**

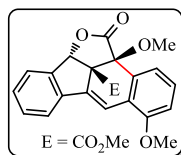

White solid, m.p. = 238 - 239 °C, purified by chromatography (petroleum/ethyl acetate = 5/1),  $R_f$  = 0.3, 48 mg, yield = 63%; **<sup>1</sup>H NMR** (400 MHz,  $CDCl_3$ )  $\delta$  7.66 (d,  $J$  = 7.5 Hz, 1H), 7.63 (d,  $J$  = 7.7 Hz, 1H), 7.47 (t,  $J$  = 7.5 Hz, 1H), 7.39 – 7.32 (m, 4H), 6.96 – 6.91 (m, 1H), 6.32 (s, 1H), 3.90 (s, 3H), 3.78 (s, 3H), 3.57 (s, 3H); **<sup>13</sup>C NMR** (100 MHz,  $CDCl_3$ )  $\delta$  172.2, 167.3, 155.8, 140.2, 140.0, 134.4, 133.8, 131.3, 129.8, 129.2, 127.2, 121.7, 121.6, 120.0, 119.7, 111.7, 85.1, 85.0, 63.2, 56.5, 55.8, 53.0; **IR** (KBr,  $cm^{-1}$ ) 3062, 2949, 2841, 2052, 1927, 1780, 1733, 1642, 1583, 1467, 1335, 1268, 1201, 1157, 1063, 969, 909, 882, 826, 752, 637, 566, 504; **HRMS** (ESI) Calcd for  $C_{22}H_{19}O_6$  (M+H)<sup>+</sup> 379.1176, found 379.1178.

**Methyl 2a-methoxy-3,5-dimethyl-2-oxo-2a,11b-dihydrobenzo[2,3]fluoreno[9,1-bc]furan-2a<sup>1</sup>(2H)-carboxylate (3g)**

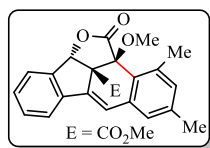

Yellow solid, m.p. = 235 - 236 °C, purified by chromatography (petroleum/ethyl acetate = 5/1),  $R_f$  = 0.4, 50 mg, yield = 67%; **<sup>1</sup>H NMR** (400 MHz,  $CDCl_3$ )  $\delta$  7.66 (d,  $J$  = 7.5 Hz, 1H), 7.57 (d,  $J$  = 7.6 Hz, 1H), 7.46 (t,  $J$  = 7.5 Hz, 1H), 7.36 (t,  $J$  = 7.5 Hz, 1H), 6.95 (s, 1H), 6.89 (s, 1H), 6.83 (s, 1H), 6.33 (s, 1H), 3.67 (s, 3H), 3.61 (s, 3H), 2.56 (s, 3H), 2.30 (s, 3H); **<sup>13</sup>C NMR** (100 MHz,  $CDCl_3$ )  $\delta$  171.9, 167.7, 140.1, 139.8, 139.7, 138.9, 134.4, 134.2, 134.1, 131.3, 129.3, 127.9, 127.6, 127.3, 126.1, 121.4, 87.3, 84.9, 64.7, 55.2, 53.1, 22.2, 20.9; **IR** (KBr,  $cm^{-1}$ ) 3652, 2953, 2838, 1778, 1732, 1606, 1567, 1467, 1435, 1378, 1348, 1297, 1264, 1228, 1195, 1156, 1084, 1057, 980, 910, 875, 843, 796, 759, 747, 737, 707, 625, 603, 586, 570, 550, 496, 437; **HRMS** (ESI) Calcd for  $C_{23}H_{21}O_5$  (M+H)<sup>+</sup> 377.1384, found 377.1383.

**Methyl 2a-methoxy-5-methyl-2-oxo-2a,11b-dihydrobenzo[2,3]fluoreno[9,1-bc]furan-2a<sup>1</sup>(2H)-carboxylate (3h)**

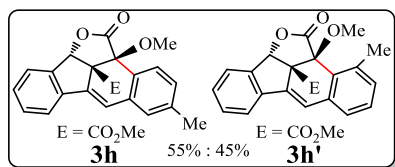

Yellow solid, m.p. = 159 - 160 °C, purified by chromatography (petroleum/ethyl acetate = 5/1),  $R_f$  = 0.4, 62 mg, yield = 85%; <sup>1</sup>H NMR (400 MHz, CDCl<sub>3</sub>)  $\delta$  7.69 – 7.62 (m, 1H), 7.60 – 7.55 (m, 1H), 7.48 – 7.44 (m, 1H), 7.39 – 7.35 (m, 1H), 7.23 – 7.18 (m, 1H), 7.13 (d,  $J$  = 7.4 Hz, 1H), 7.07 (d,  $J$  = 6.5 Hz, 1H), 6.91, 6.87 (s, 1H), 6.36, 6.34 (s, 1H), 3.78, 3.70 (s, 3H), 3.60, 3.57 (s, 3H), 2.62, 2.37 (s, 3H); <sup>13</sup>C NMR (100 MHz, CDCl<sub>3</sub>)  $\delta$  172.4, 171.6, 167.5, 167.2, 140.3, 140.1, 139.8, 139.63, 139.58, 139.2, 135.7, 134.13, 134.09, 133.6, 132.6, 131.29, 131.27, 130.8, 129.7, 129.5, 129.4, 129.3, 129.2, 128.8, 127.30, 127.26, 126.7, 125.9, 125.3, 121.5, 121.4, 87.2, 84.94, 84.91, 84.7, 64.5, 63.7, 56.3, 55.2, 53.1, 53.0, 22.4, 21.2; IR (KBr, cm<sup>-1</sup>) 3678, 2953, 2839, 1778, 1732, 1607, 1587, 1466, 1435, 1378, 1347, 1264, 1220, 1193, 1156, 1097, 1081, 1061, 978, 951, 912, 876, 844, 821, 793, 760, 738, 706, 624, 601, 568, 550, 493, 433; HRMS (ESI) Calcd for C<sub>22</sub>H<sub>19</sub>O<sub>5</sub> (M+H)<sup>+</sup> 363.1227, found 363.1228.

**Methyl 2a,4-dimethoxy-2-oxo-2a,11b-dihydrobenzo[2,3]fluoreno[9,1-bc]furan-2a<sup>1</sup>(2H)-carboxylate (3i)**

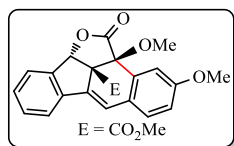

White solid, m.p. = 182 - 183 °C, purified by chromatography (petroleum/ethyl acetate = 5/1),  $R_f$  = 0.3, 59 mg, yield = 78%; <sup>1</sup>H NMR (400 MHz, CDCl<sub>3</sub>)  $\delta$  7.66 (d,  $J$  = 7.5 Hz, 1H), 7.56 (d,  $J$  = 7.6 Hz, 1H), 7.46 (t,  $J$  = 7.5 Hz, 1H), 7.35 (t,  $J$  = 7.5 Hz, 1H), 7.31 (d,  $J$  = 2.5 Hz, 1H), 7.19 (d,  $J$  = 8.3 Hz, 1H), 6.90 (s, 1H), 6.87 (dd,  $J$  = 8.3, 2.6 Hz, 1H), 6.30 (s, 1H), 3.87 (s, 3H), 3.78 (s, 3H), 3.58 (s, 3H); <sup>13</sup>C NMR (100 MHz, CDCl<sub>3</sub>)  $\delta$  172.1, 167.4, 160.5, 140.0, 139.8, 134.3, 133.3, 131.3, 129.1, 129.0, 127.3, 125.6, 124.9, 121.3, 114.2, 114.1, 85.0, 84.9, 63.5, 56.5, 55.5, 53.1; IR (KBr, cm<sup>-1</sup>) 3902, 3856, 3842, 3823, 3807, 3753, 3737, 3714, 3692, 3678, 3652, 3632, 3621, 2954, 2838, 1778, 1733, 1603, 1572, 1495, 1465, 1432, 1342, 1298, 1264, 1226, 1154, 1079, 1058, 1037, 966, 914, 879, 815, 794, 765, 739, 705, 661, 626, 588, 560, 534, 504; HRMS (ESI) Calcd for C<sub>22</sub>H<sub>19</sub>O<sub>6</sub> (M+H)<sup>+</sup> 379.1176, found 379.1177.

**Methyl 4-fluoro-2a-methoxy-2-oxo-2a,11b-dihydrobenzo[2,3]fluoreno[9,1-bc]furan-2a<sup>1</sup>(2H)-carboxylate (3j)**

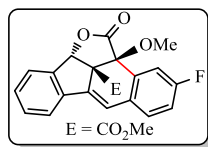

Yellow solid, m.p. = 220 - 221 °C, purified by chromatography (petroleum/ethyl acetate = 5/1),  $R_f$  = 0.4, 39 mg, yield = 53%; <sup>1</sup>H NMR (400 MHz, CDCl<sub>3</sub>)  $\delta$  7.68 (d,  $J$  = 7.5 Hz, 1H), 7.59 (d,  $J$  = 7.6 Hz, 1H), 7.50 – 7.45 (m, 2H), 7.39 (t,  $J$  = 7.5 Hz, 1H), 7.25 – 7.21 (m, 1H), 7.07 – 7.02 (m, 1H), 6.91 (s, 1H), 6.32 (s, 1H), 3.78 (s, 3H), 3.58 (s, 3H); <sup>13</sup>C NMR (100 MHz, CDCl<sub>3</sub>)  $\delta$  171.6, 167.0, 163.2 (d,  $J$  = 248.7 Hz), 139.9, 139.6, 135.4 (d,  $J$  = 2.9 Hz), 135.1 (d,  $J$  = 7.9 Hz), 131.4, 129.6, 129.2 (d,  $J$  = 8.2 Hz), 128.9 (d,  $J$  = 3.3 Hz), 127.4, 124.1, 121.6, 116.1 (d,  $J$  = 21.9 Hz), 115.6 (d,  $J$  = 24.8 Hz), 84.9, 84.7 (d,  $J$  = 1.5 Hz), 63.4, 56.5, 53.1; <sup>19</sup>F NMR (376 MHz, CDCl<sub>3</sub>)  $\delta$  -110.9; IR (KBr, cm<sup>-1</sup>) 3856, 3753, 3737, 3714, 3693, 3678, 3652, 3632, 2954, 2841, 1781, 1735, 1606, 1587, 1492, 1466, 1434, 1344, 1265, 1239, 1205, 1156, 1100, 1076, 1059, 970, 915, 879, 844, 821, 791, 781, 765, 739, 705, 660, 624, 578, 516; HRMS (ESI) Calcd for C<sub>21</sub>H<sub>16</sub>O<sub>5</sub>F (M+H)<sup>+</sup> 367.0976, found 367.0980.

**Methyl 4-chloro-2a-methoxy-2-oxo-2a,11b-dihydrobenzo[2,3]fluoreno[9,1-*bc*]furan-2a<sup>1</sup>(2*H*)-carboxylate (3k)**

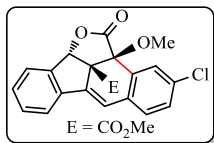

White solid, m.p. = 214 - 215 °C, purified by chromatography (petroleum/ethyl acetate = 5/1),  $R_f$  = 0.4, 42 mg, yield = 55%;  $^1\text{H NMR}$  (400 MHz,  $\text{CDCl}_3$ )  $\delta$  7.72 (d,  $J$  = 1.5 Hz, 1H), 7.68 (d,  $J$  = 7.5 Hz, 1H), 7.59 (d,  $J$  = 7.6 Hz, 1H), 7.49 (t,  $J$  = 7.5 Hz, 1H), 7.40 (t,  $J$  = 7.5 Hz, 1H), 7.33 (dd,  $J$  = 8.0, 1.5 Hz, 1H), 7.18 (d,  $J$  = 8.1 Hz, 1H), 6.90 (s, 1H), 6.33 (s, 1H), 3.78 (s, 3H), 3.58 (s, 3H);  $^{13}\text{C NMR}$  (100 MHz,  $\text{CDCl}_3$ )  $\delta$  171.4, 166.7, 140.0, 139.4, 136.2, 134.7, 134.1, 131.4, 131.1, 129.6, 129.4, 128.7, 128.0, 127.3, 123.9, 121.6, 84.8, 84.5, 63.5, 56.4, 53.1; **IR** (KBr,  $\text{cm}^{-1}$ ) 3856, 3842, 3823, 3807, 3752, 3737, 3713, 3692, 3678, 3652, 3632, 3066, 2953, 2840, 1780, 1735, 1592, 1562, 1480, 1435, 1409, 1345, 1264, 1194, 1157, 1093, 1077, 1058, 975, 959, 914, 879, 821, 794, 762, 745, 688, 657, 626, 563, 506, 452; **HRMS** (ESI) Calcd for  $\text{C}_{21}\text{H}_{16}\text{O}_5\text{Cl}$  ( $\text{M}+\text{H}$ )<sup>+</sup> 383.0681, found 383.0684.

**Methyl 4-bromo-2a-methoxy-2-oxo-2a,11b-dihydrobenzo[2,3]fluoreno[9,1-*bc*]furan-2a<sup>1</sup>(2*H*)-carboxylate (3l)**

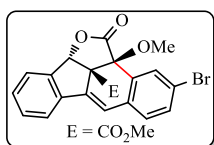

Yellow solid, m.p. = 232 - 233 °C, purified by chromatography (petroleum/ethyl acetate = 5/1),  $R_f$  = 0.4, 44 mg, yield = 52%;  $^1\text{H NMR}$  (400 MHz,  $\text{CDCl}_3$ )  $\delta$  7.86 (d,  $J$  = 1.8 Hz, 1H), 7.68 (d,  $J$  = 7.5 Hz, 1H), 7.59 (d,  $J$  = 7.6 Hz, 1H), 7.52 - 7.46 (m, 2H), 7.40 (t,  $J$  = 7.4 Hz, 1H), 7.11 (d,  $J$  = 8.1 Hz, 1H), 6.89 (s, 1H), 6.32 (s, 1H), 3.78 (s, 3H), 3.58 (s, 3H);  $^{13}\text{C NMR}$  (100 MHz,  $\text{CDCl}_3$ )  $\delta$  171.6, 166.8, 140.1, 139.5, 136.4, 134.4, 132.6, 131.7, 131.5, 130.9, 129.8, 129.0, 127.4, 124.1, 122.9, 121.7, 84.9, 84.5, 63.6, 56.5, 53.2; **IR** (KBr,  $\text{cm}^{-1}$ ) 3855, 3752, 3713, 3692, 3678, 2953, 2846, 1781, 1735, 1588, 1561, 1477, 1435, 1403, 1345, 1272, 1195, 1157, 1086, 1059, 974, 953, 914, 879, 820, 794, 762, 745, 718, 675, 624, 557, 506; **HRMS** (ESI) Calcd for  $\text{C}_{21}\text{H}_{16}\text{O}_5\text{Br}$  ( $\text{M}+\text{H}$ )<sup>+</sup> 427.0176, found 427.0178.

**Methyl 6-chloro-2a-methoxy-2-oxo-2a,11b-dihydrobenzo[2,3]fluoreno[9,1-*bc*]furan-2a<sup>1</sup>(2*H*)-carboxylate (3m)**

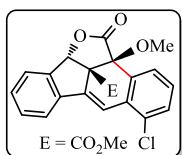

White solid, m.p. = 243 - 244 °C, purified by chromatography (petroleum/ethyl acetate = 6/1),  $R_f$  = 0.4, 46 mg, yield = 60%;  $^1\text{H NMR}$  (400 MHz,  $\text{CDCl}_3$ )  $\delta$  7.70 - 7.65 (m, 3H), 7.51 (t,  $J$  = 7.6 Hz, 1H), 7.44 - 7.39 (m, 2H), 7.34 - 7.29 (m, 2H), 6.34 (s, 1H), 3.77 (s, 3H), 3.58 (s, 3H);  $^{13}\text{C NMR}$  (100 MHz,  $\text{CDCl}_3$ )  $\delta$  171.6, 166.8, 140.3, 139.6, 137.3, 134.8, 132.6, 131.5, 130.7, 130.4, 129.9, 129.5, 127.3, 126.1, 122.0, 121.4, 85.0, 84.9, 63.3, 56.5, 53.2; **IR** (KBr,  $\text{cm}^{-1}$ ) 3056, 2953, 2840, 1937, 1783, 1735, 1563, 1467, 1451, 1439, 1347, 1272, 1200, 1155, 1090, 1060, 981, 956, 916, 876, 856, 832, 794, 766, 736, 705, 652, 624, 593, 570, 534, 495, 434; **HRMS** (ESI) Calcd for  $\text{C}_{21}\text{H}_{16}\text{O}_5\text{Cl}$  ( $\text{M}+\text{H}$ )<sup>+</sup> 383.0681, found 383.0686.

**Methyl 2a-methoxy-9-methyl-2-oxo-2a,11b-dihydrobenzo[2,3]fluoreno[9,1-*bc*]furan-2a<sup>1</sup>(2*H*)-carboxylate (3q)**

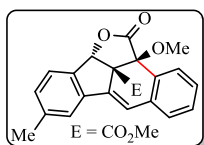

Yellow solid, m.p. = 219 - 220 °C, purified by chromatography (petroleum/ethyl acetate = 5/1),  $R_f$  = 0.4, 51 mg, yield = 70%;  $^1\text{H NMR}$  (400 MHz,  $\text{CDCl}_3$ )  $\delta$  7.77 - 7.71 (m, 1H), 7.56 (d,  $J$  = 7.7 Hz, 1H), 7.41 - 7.93 (m, 1H), 7.40 - 7.33 (m, 2H), 7.26 - 7.23 (m, 1H), 7.20 (d,  $J$  = 7.7 Hz, 1H), 6.92 (s, 1H), 6.30 (s, 1H), 3.78 (s, 3H), 3.57 (s, 3H), 2.43 (s, 3H);  $^{13}\text{C NMR}$  (100 MHz,  $\text{CDCl}_3$ )  $\delta$  172.2, 167.3, 141.7, 139.9,

137.6, 135.9, 132.8, 132.5, 130.5, 129.4, 129.0, 127.9, 127.5, 127.0, 124.8, 122.0, 85.0, 84.8, 63.9, 56.4, 53.1, 21.8; **IR** (KBr,  $\text{cm}^{-1}$ ) 3850, 3646, 3543, 22953, 2839, 1783, 1733, 1614, 1483, 1454, 1435, 1379, 1343, 1306, 1262, 1198, 1161, 1115, 1082, 1058, 975, 907, 864, 817, 796, 784, 763, 736, 711, 649, 614, 573, 543, 503; **HRMS** (ESI) Calcd for  $\text{C}_{22}\text{H}_{18}\text{O}_5\text{Na}$  ( $\text{M}+\text{Na}$ )<sup>+</sup> 385.1046, found 385.1048.

**Methyl 2a,10-dimethoxy-2-oxo-2a,11b-dihydrobenzo[2,3]fluoreno[9,1-*bc*]furan-2a<sup>1</sup>(2*H*)-carboxylate (3r)**

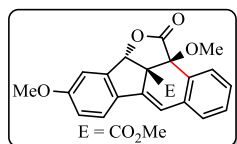

Yellow solid, m.p. = 192 - 193 °C, purified by chromatography (petroleum/ethyl acetate = 4/1),  $R_f$  = 0.4, 69 mg, yield = 91%; **<sup>1</sup>H NMR** (400 MHz,  $\text{CDCl}_3$ )  $\delta$  7.76 – 7.70 (m, 1H), 7.49 (d,  $J$  = 8.5 Hz, 1H), 7.37 – 7.31 (m, 2H), 7.24 – 7.19 (m, 2H), 7.02 (dd,  $J$  = 8.5, 1.9 Hz, 1H), 6.81 (s, 1H), 6.29 (s, 1H), 3.84 (s, 3H), 3.78 (s, 3H), 3.56 (s, 3H); **<sup>13</sup>C NMR** (100 MHz,  $\text{CDCl}_3$ )  $\delta$  172.2, 167.3, 161.0, 141.9, 135.3, 133.1, 132.2, 131.9, 129.3, 128.5, 127.6, 127.3, 122.9, 122.7, 118.4, 111.5, 84.8, 84.7, 64.1, 56.4, 55.7, 53.0; **IR** (KBr,  $\text{cm}^{-1}$ ) 3855, 3752, 3652, 3548, 3064, 3001, 2954, 2839, 2540, 2046, 1958, 1784, 1736, 1657, 1610, 1582, 1491, 1459, 1438, 1342, 1256, 1215, 1194, 1154, 1133, 1099, 1081, 1059, 1027, 975, 948, 929, 909, 860, 828, 789, 757, 736, 702, 679, 645, 623, 603, 586, 540, 505, 446; **HRMS** (ESI) Calcd for  $\text{C}_{22}\text{H}_{18}\text{O}_6\text{Na}$  ( $\text{M}+\text{Na}$ )<sup>+</sup> 401.0996, found 401.0999.

**Methyl 2a,9,10-trimethoxy-2-oxo-2a,11b-dihydrobenzo[2,3]fluoreno[9,1-*bc*]furan-2a<sup>1</sup>(2*H*)-carboxylate (3s)**

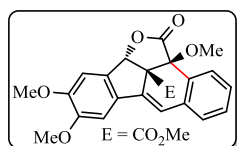

Yellow solid, m.p. = 197 - 198 °C, purified by chromatography (petroleum/ethyl acetate = 2/1),  $R_f$  = 0.3, 57 mg, yield = 70%; **<sup>1</sup>H NMR** (400 MHz,  $\text{CDCl}_3$ )  $\delta$  7.75 – 7.69 (m, 1H), 7.37 – 7.32 (m, 2H), 7.24 – 7.20 (m, 1H), 7.16 (s, 1H), 7.04 (s, 1H), 6.81 (s, 1H), 6.28 (s, 1H), 3.94 (s, 6H), 3.77 (s, 3H), 3.57 (s, 3H); **<sup>13</sup>C NMR** (100 MHz,  $\text{CDCl}_3$ )  $\delta$  172.3, 167.4, 152.3, 150.9, 136.0, 133.1, 133.0, 132.9, 132.2, 129.4, 128.6, 127.6, 127.4, 122.7, 109.1, 103.5, 85.2, 84.9, 64.1, 56.5, 56.3, 56.2, 53.1; **IR** (KBr,  $\text{cm}^{-1}$ ) 3064, 2950, 2839, 1778, 1732, 1602, 1499, 1462, 1329, 1264, 1150, 1087, 1000, 956, 902, 857, 749, 631, 582, 545, 501; **HRMS** (ESI) Calcd for  $\text{C}_{23}\text{H}_{21}\text{O}_7$  ( $\text{M}+\text{H}$ )<sup>+</sup> 409.1282, found 409.1285.

**Methyl 2a-methoxy-2-oxo-2a,12b-dihydrobenzo[6,7]furo[4',3',2':8,9]fluoreno[2,3-*d*][1,3]dioxole-2a<sup>1</sup>(2*H*)-carboxylate (3t)**

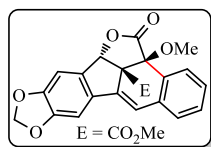

White solid, m.p. = 208 - 209 °C, purified by chromatography (petroleum/ethyl acetate = 3/1),  $R_f$  = 0.4, 56 mg, yield = 72%; **<sup>1</sup>H NMR** (400 MHz,  $\text{CDCl}_3$ )  $\delta$  7.76 – 7.68 (m, 1H), 7.38 – 7.31 (m, 2H), 7.24 – 7.20 (m, 1H), 7.09 (s, 1H), 6.98 (s, 1H), 6.77 (s, 1H), 6.23 (s, 1H), 6.04 (d,  $J$  = 7.3 Hz, 2H), 3.76 (s, 3H), 3.57 (s, 3H); **<sup>13</sup>C NMR** (100 MHz,  $\text{CDCl}_3$ )  $\delta$  172.2, 167.3, 150.9, 149.4, 135.5, 134.7, 134.6, 132.8, 132.2, 129.4, 128.7, 127.7, 127.4, 123.1, 107.2, 102.2, 101.6, 84.9, 84.8, 64.2, 56.5, 53.1; **IR** (KBr,  $\text{cm}^{-1}$ ) 3669, 3065, 2959, 2840, 2354, 1782, 1733, 1656, 1602, 1502, 1475, 1368, 1333, 1306, 1272, 1253, 1197, 1158, 1081, 1037, 987, 965, 942, 908, 865, 804, 791, 777, 761, 736, 701, 642, 602, 537, 506, 433; **HRMS** (ESI) Calcd for  $\text{C}_{22}\text{H}_{17}\text{O}_7$  ( $\text{M}+\text{H}$ )<sup>+</sup> 393.0969, found 393.0971.

**Methyl 9-fluoro-2a-methoxy-2-oxo-2a,11b-dihydrobenzo[2,3]fluoreno[9,1-*bc*]furan-2a<sup>1</sup>(2*H*)-carboxylate (3u)**

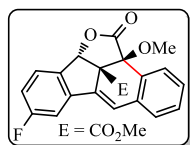

Yellow solid, m.p. = 184 - 185 °C, purified by chromatography (petroleum/ethyl acetate = 5/1),  $R_f$  = 0.4, 33 mg, yield = 45%;  $^1\text{H NMR}$  (400 MHz,  $\text{CDCl}_3$ )  $\delta$  7.76 (d,  $J$  = 7.3 Hz, 1H), 7.67 (dd,  $J$  = 8.3, 4.9 Hz, 1H), 7.45 – 7.38 (m, 2H), 7.30 – 7.26 (m, 2H), 7.12 – 7.07 (m, 1H), 6.97 (s, 1H), 6.31 (s, 1H), 3.80 (s, 3H), 3.60 (s, 3H);  $^{13}\text{C NMR}$  (100 MHz,  $\text{CDCl}_3$ )  $\delta$  171.9, 167.0, 165.0 (d,  $J$  = 250.6 Hz), 142.1 (d,  $J$  = 9.7 Hz), 136.0 (d,  $J$  = 2.5 Hz), 134.9 (d,  $J$  = 3.5 Hz), 132.5, 132.3, 129.5 (d,  $J$  = 2.8 Hz), 129.0, 128.9, 128.2, 127.6, 126.4, 116.8 (d,  $J$  = 23.6 Hz), 108.6 (d,  $J$  = 23.7 Hz), 84.9, 84.1, 64.3, 56.5, 53.2;  $^{19}\text{F NMR}$  (376 MHz,  $\text{CDCl}_3$ )  $\delta$  -108.7; **IR** (KBr,  $\text{cm}^{-1}$ ) 3856, 3737, 3692, 3678, 3066, 2954, 2840, 1782, 1734, 1611, 1590, 1479, 1437, 1347, 1282, 1261, 1215, 1197, 1158, 1081, 1056, 974, 941, 909, 864, 821, 798, 785, 762, 709, 649, 624, 573, 539, 505; **HRMS** (ESI) Calcd for  $\text{C}_{21}\text{H}_{16}\text{O}_5\text{F}$  ( $\text{M}+\text{H}$ )<sup>+</sup> 367.0976, found 367.0977.

**Methyl 10-fluoro-2a-methoxy-2-oxo-2a,11b-dihydrobenzo[2,3]fluoreno[9,1-*bc*]furan-2a<sup>1</sup>(2*H*)-carboxylate (3v)**

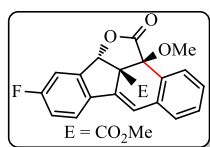

Yellow solid, m.p. = 190 - 191 °C, purified by chromatography (petroleum/ethyl acetate = 5/1),  $R_f$  = 0.4, 39 mg, yield = 53%;  $^1\text{H NMR}$  (400 MHz,  $\text{CDCl}_3$ )  $\delta$  7.75 – 7.69 (m, 1H), 7.56 (dd,  $J$  = 8.4, 4.9 Hz, 1H), 7.41 – 7.34 (m, 3H), 7.24 (d,  $J$  = 2.2 Hz, 1H), 7.21 – 7.16 (m, 1H), 6.89 (s, 1H), 6.27 (s, 1H), 3.77 (s, 3H), 3.58 (s, 3H);  $^{13}\text{C NMR}$  (100 MHz,  $\text{CDCl}_3$ )  $\delta$  172.0, 167.0, 163.2 (d,  $J$  = 250.7 Hz), 142.1 (d,  $J$  = 8.5 Hz), 135.8 (d,  $J$  = 2.8 Hz), 134.5, 132.6, 132.1, 129.5, 129.1, 127.9, 127.4, 124.8, 123.1 (d,  $J$  = 8.9 Hz), 118.9 (d,  $J$  = 23.4 Hz), 114.5 (d,  $J$  = 23.2 Hz), 84.8, 84.1 (d,  $J$  = 2.1 Hz), 64.2, 56.5, 53.1;  $^{19}\text{F NMR}$  (376 MHz,  $\text{CDCl}_3$ )  $\delta$  -110.3; **IR** (KBr,  $\text{cm}^{-1}$ ) 3651, 3067, 2954, 2840, 1785, 1733, 1658, 1613, 1596, 1485, 1454, 1437, 1341, 1294, 1266, 1250, 1185, 1159, 1133, 1082, 1059, 980, 952, 911, 876, 828, 807, 790, 764, 736, 643, 622, 583, 549, 521, 505, 445; **HRMS** (ESI) Calcd for  $\text{C}_{21}\text{H}_{16}\text{O}_5\text{F}$  ( $\text{M}+\text{H}$ )<sup>+</sup> 367.0976, found 367.0979.

**Methyl 9-chloro-2a-methoxy-2-oxo-2a,11b-dihydrobenzo[2,3]fluoreno[9,1-*bc*]furan-2a<sup>1</sup>(2*H*)-carboxylate (3w)**

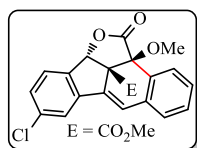

White solid, m.p. = 205 - 206 °C, purified by chromatography (petroleum/ethyl acetate = 6/1),  $R_f$  = 0.4, 47 mg, yield = 61%;  $^1\text{H NMR}$  (400 MHz,  $\text{CDCl}_3$ )  $\delta$  7.76 (d,  $J$  = 7.3 Hz, 1H), 7.62 (d,  $J$  = 8.1 Hz, 1H), 7.59 (d,  $J$  = 1.4 Hz, 1H), 7.44 – 7.36 (m, 3H), 7.28 (d,  $J$  = 5.6 Hz, 1H), 6.98 (s, 1H), 6.30 (s, 1H), 3.80 (s, 3H), 3.60 (s, 3H);  $^{13}\text{C NMR}$  (100 MHz,  $\text{CDCl}_3$ )  $\delta$  171.9, 166.9, 141.5, 138.5, 137.7, 134.5, 132.4, 132.2, 129.6, 129.5, 128.4, 128.2, 127.5, 126.4, 121.9, 84.8, 84.0, 63.9, 56.5, 53.2; **IR** (KBr,  $\text{cm}^{-1}$ ) 2953, 2840, 1782, 1734, 1605, 1568, 1463, 1340, 1268, 1199, 1157, 1079, 979, 911, 870, 752, 651, 611, 504, 467; **HRMS** (ESI) Calcd for  $\text{C}_{21}\text{H}_{15}\text{O}_5\text{FNa}$  ( $\text{M}+\text{Na}$ )<sup>+</sup> 405.0500, found 405.0504.

**Methyl 10-chloro-2a-methoxy-2-oxo-2a,11b-dihydrobenzo[2,3]fluoreno[9,1-*bc*]furan-2a<sup>1</sup>(2*H*)-carboxylate (3x)**

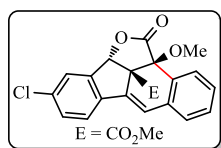

Pale yellow solid, m.p. = 228 - 229 °C, purified by chromatography (petroleum/ethyl acetate = 6/1),  $R_f$  = 0.4, 50 mg, yield = 65%;  $^1\text{H NMR}$  (400 MHz,  $\text{CDCl}_3$ )  $\delta$  7.73 (d,  $J$  = 7.1 Hz, 1H), 7.66 (d,  $J$  = 1.6 Hz, 1H), 7.51 (d,  $J$  = 8.2 Hz, 1H), 7.44 (dd,  $J$  = 8.2, 1.8 Hz, 1H), 7.41 – 7.33 (m, 2H), 7.26 – 7.21 (m,

1H), 6.92 (s, 1H), 6.27 (s, 1H), 3.77 (s, 3H), 3.57 (s, 3H); <sup>13</sup>C NMR (100 MHz, CDCl<sub>3</sub>) δ 171.9, 166.9, 141.7, 138.1, 135.1, 134.5, 132.4, 132.2, 131.7, 129.5, 129.3, 128.1, 127.6, 127.4, 125.7, 122.7, 84.7, 84.0, 63.9, 56.5, 53.2; IR (KBr, cm<sup>-1</sup>) 2951, 2844, 1783, 1734, 1464, 1264, 1158, 1075, 978, 886, 827, 753, 642, 507, 444; HRMS (ESI) Calcd for C<sub>21</sub>H<sub>15</sub>O<sub>5</sub>FNa (M+Na)<sup>+</sup> 405.0500, found 405.0501.

#### 1.4.2 General procedure for 3aa – 3ah

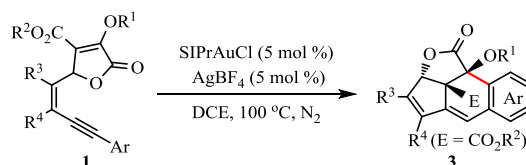

In a Schlenk tube with a magnetic bar under nitrogen atmosphere was added SIPrAuCl (5 mol %) and AgBF<sub>4</sub> (5 mol %) in 1,2-dichloroethane (DCE, 2 mL), and then the substrates **1aa** – **1ah** (0.2 mmol) were added. The mixture was stirred at 100 °C until the starting materials was completely consumed (monitored by TLC). After that, the mixture was filtered by short silica, the solvent was evaporated by rotary evaporator, and the residue was purified by flash column chromatography on silica gel using petroleum ether and ethyl acetate as elute to afford the pure product **3aa** – **3ah**.

#### Methyl-9b-methoxy-3-methyl-1-oxo-4-phenyl-2a,9b-dihydrobenzo[5,6]indeno[1,7-bc]furan-2a<sup>1</sup>(1H)-carboxylate (**3aa**)

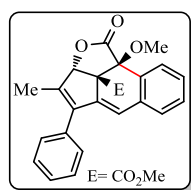

Yellow solid, m.p. = 145-146 °C, purified by chromatography (petroleum/ethyl acetate = 6/1), R<sub>f</sub> = 0.4, 37 mg, yield = 63%; <sup>1</sup>H NMR (400 MHz, CDCl<sub>3</sub>) δ 7.74 – 7.69 (m, 1H), 7.49 – 7.38 (m, 3H), 7.37 – 7.27 (m, 4H), 7.11 – 7.07 (m, 1H), 6.38 (s, 1H), 5.83 (s, 1H), 3.73 (s, 3H), 3.66 (s, 3H), 2.16 (s, 3H); <sup>13</sup>C NMR (100 MHz, CDCl<sub>3</sub>) δ 172.8, 167.5, 144.2, 140.6, 139.8, 133.0, 132.7, 132.3, 129.5, 129.3, 128.8, 128.8, 128.6, 127.9, 127.5, 123.1, 89.8, 84.6, 61.0, 56.4, 53.1, 14.8; IR (KBr, cm<sup>-1</sup>) 2974, 2954, 2928, 2849, 1782, 1733, 1626, 1597, 1547, 1482, 1436, 1385, 1360, 1305, 1262, 1195, 1158, 1139, 1082, 1056, 1008, 984, 960, 930, 905, 883, 864, 852, 805, 779, 750, 702, 654, 617, 546, 517, 472, 453; HRMS (ESI) Calcd for C<sub>24</sub>H<sub>20</sub>NaO<sub>5</sub> (M+Na)<sup>+</sup> 411.1203, found 411.1206.

#### Ethyl-9b-ethoxy-3-methyl-1-oxo-4-phenyl-2a,9b-dihydrobenzo[5,6]indeno[1,7-bc]furan-2a<sup>1</sup>(1H)-carboxylate (**3ab**)

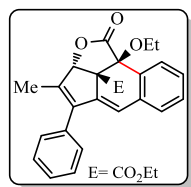

Pale yellow solid, m.p. = 148-149 °C, purified by chromatography (petroleum/ethyl acetate = 6/1), R<sub>f</sub> = 0.4, 43 mg, yield = 70%; <sup>1</sup>H NMR (400 MHz, CDCl<sub>3</sub>) δ 7.72 (d, *J* = 7.3 Hz, 1H), 7.49 – 7.39 (m, 3H), 7.38 – 7.27 (m, 4H), 7.11 – 7.05 (m, 1H), 6.38 (s, 1H), 5.80 (s, 1H), 4.19 – 4.06 (m, 2H), 3.99 – 3.84 (m, 2H), 2.15 (s, 3H), 1.35 (t, *J* = 6.9 Hz, 3H), 1.08 (t, *J* = 7.1 Hz, 3H); <sup>13</sup>C NMR (100 MHz, CDCl<sub>3</sub>) δ 173.2, 166.9, 144.3, 140.8, 139.8, 133.2, 133.1, 132.5, 129.9, 129.4, 129.1, 128.7, 128.5, 127.6, 127.5, 123.0, 89.8, 84.1, 64.1, 61.8, 61.3, 15.7, 14.8, 14.0; IR (KBr, cm<sup>-1</sup>) 3741, 2980, 1781, 1731, 1447, 1370, 1259, 1165, 1073, 1016, 930, 856, 745, 704, 653, 507; HRMS (ESI) Calcd for C<sub>26</sub>H<sub>25</sub>O<sub>5</sub> (M+H)<sup>+</sup> 417.1697, found 417.1699.

**Methyl-9b-methoxy-3-methyl-1-oxo-4-(p-tolyl)-2a,9b-dihydrobenzo[5,6]indeno[1,7-*bc*]furan-2a<sup>1</sup>(1*H*)-carboxylate (3ac)**

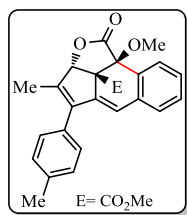

Yellow solid, m.p. = 152-153 °C, purified by chromatography (petroleum/ethyl acetate = 5/1),  $R_f$  = 0.4, 38 mg, yield = 65%; <sup>1</sup>H NMR (400 MHz, CDCl<sub>3</sub>)  $\delta$  7.71 (d,  $J$  = 7.3 Hz, 1H), 7.35 – 7.27 (m, 3H), 7.25 – 7.23 (m, 3H), 7.09 (d,  $J$  = 7.0 Hz, 1H), 6.38 (s, 1H), 5.81 (s, 1H), 3.73 (s, 3H), 3.66 (s, 3H), 2.41 (s, 3H), 2.15 (s, 3H); <sup>13</sup>C NMR (100 MHz, CDCl<sub>3</sub>)  $\delta$  172.8, 167.5, 144.2, 140.8, 139.3, 138.8, 133.1, 132.8, 129.5, 129.4, 129.3, 129.3, 128.6, 127.8, 127.5, 123.0, 90.0, 84.7, 61.0, 56.4, 53.1, 21.5, 14.8; IR (KBr, cm<sup>-1</sup>) 3852, 3742, 2922, 1779, 1733, 1514, 1446, 1263, 1155, 1077, 955, 755, 509; HRMS (ESI) Calcd for C<sub>25</sub>H<sub>23</sub>O<sub>5</sub> (M+H)<sup>+</sup> 403.1540, found 403.1545.

**Methyl-4-(4-(tert-butyl)phenyl)-9b-methoxy-3-methyl-1-oxo-2a,9b-dihydrobenzo[5,6]indeno[1,7-*bc*]furan-2a<sup>1</sup>(1*H*)-carboxylate (3ad)**

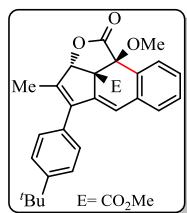

Yellow solid, m.p. = 148-149 °C, purified by chromatography (petroleum/ethyl acetate = 5/1),  $R_f$  = 0.4, 40 mg, yield = 62%; <sup>1</sup>H NMR (400 MHz, CDCl<sub>3</sub>)  $\delta$  7.71 (d,  $J$  = 7.5 Hz, 1H), 7.46 (d,  $J$  = 8.2 Hz, 2H), 7.35 – 7.27 (m, 4H), 7.11 (d,  $J$  = 6.8 Hz, 1H), 6.43 (s, 1H), 5.81 (s, 1H), 3.73 (s, 3H), 3.65 (s, 3H), 2.17 (s, 3H), 1.36 (s, 9H); <sup>13</sup>C NMR (100 MHz, CDCl<sub>3</sub>)  $\delta$  172.9, 167.5, 151.9, 144.1, 140.7, 139.3, 133.1, 132.7, 129.3, 129.2, 129.1, 128.6, 127.8, 127.5, 125.6, 123.1, 90.1, 84.6, 61.0, 56.4, 53.1, 34.9, 31.4, 14.9; IR (KBr, cm<sup>-1</sup>) 3853, 3742, 3617, 2959, 1781, 1733, 1513, 1447, 1264, 1157, 1080, 957, 842, 751; HRMS (ESI) Calcd for C<sub>28</sub>H<sub>29</sub>O<sub>5</sub> (M+H)<sup>+</sup> 445.2010, found 445.2016.

**Methyl-9b-methoxy-4-(4-methoxyphenyl)-3-methyl-1-oxo-2a,9b-dihydrobenzo[5,6]indeno[1,7-*bc*]furan-2a<sup>1</sup>(1*H*)-carboxylate (3ae)**

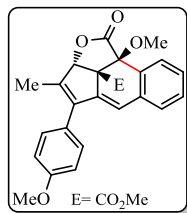

Yellow solid, m.p. = 154-155 °C, purified by chromatography (petroleum/ethyl acetate = 4/1),  $R_f$  = 0.3, 34 mg, yield = 55%; <sup>1</sup>H NMR (400 MHz, CDCl<sub>3</sub>)  $\delta$  7.75 – 7.67 (m, 1H), 7.35 – 7.27 (m, 4H), 7.13 – 7.07 (m, 1H), 7.00 – 6.96 (m, 2H), 6.39 (s, 1H), 5.81 (s, 1H), 3.86 (s, 3H), 3.72 (s, 3H), 3.65 (s, 3H), 2.16 (s, 3H); <sup>13</sup>C NMR (100 MHz, CDCl<sub>3</sub>)  $\delta$  172.9, 167.5, 160.0, 143.8, 140.9, 138.7, 133.1, 132.8, 130.9, 129.3, 128.6, 127.8, 127.5, 124.5, 123.1, 114.2, 90.1, 84.7, 61.0, 56.4, 55.5, 53.1, 14.9; IR (KBr, cm<sup>-1</sup>) 3835, 3741, 3680, 2926, 2846, 1778, 1733, 1609, 1512, 1448, 1254, 1162, 1079, 954, 839, 753; HRMS (ESI) Calcd for C<sub>25</sub>H<sub>23</sub>O<sub>6</sub> (M+H)<sup>+</sup> 419.1489, found 419.1494.

**Methyl-4-(4-chlorophenyl)-9b-methoxy-3-methyl-1-oxo-2a,9b-dihydrobenzo[5,6]indeno[1,7-*bc*]furan-2a<sup>1</sup>(1*H*)-carboxylate (3af)**

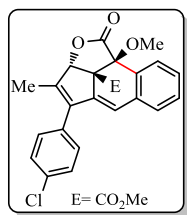

Yellow solid, m.p. = 151-152 °C, purified by chromatography (petroleum/ethyl acetate = 5/1),  $R_f$  = 0.4, 36 mg, yield = 57%; <sup>1</sup>H NMR (400 MHz, CDCl<sub>3</sub>)  $\delta$  7.71 (d,  $J$  = 7.4 Hz, 1H), 7.44 (d,  $J$  = 8.4 Hz, 2H), 7.35 – 7.27 (m, 4H), 7.10 (d,  $J$  = 7.0 Hz, 1H), 6.35 (s, 1H), 5.81 (s, 1H), 3.72 (s, 3H), 3.66 (s, 3H), 2.14 (s, 3H); <sup>13</sup>C NMR (100 MHz, CDCl<sub>3</sub>)  $\delta$  172.7, 167.4, 143.0, 140.3, 140.3, 134.8, 132.8, 132.7, 130.8, 130.7, 129.4, 129.1, 128.8, 127.9, 127.6, 123.3, 89.6, 84.6, 61.1, 56.4, 53.2, 14.8; IR (KBr, cm<sup>-1</sup>) 3741, 2948, 1780, 1733, 1489, 1447, 1389, 1265, 1159, 1085, 957, 837, 751; HRMS (ESI) Calcd for C<sub>24</sub>H<sub>20</sub>ClO<sub>5</sub> (M+H)<sup>+</sup> 423.0994, found 423.0995.

**Methyl-4-(3,5-dimethylphenyl)-9b-methoxy-3-methyl-1-oxo-2a,9b-dihydrobenzo[5,6]indeno[1,7-*b*c]furan-2a<sup>1</sup>(1*H*)-carboxylate (3ag)**

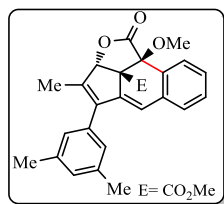

Yellow solid, m.p. = 150-151 °C, purified by chromatography (petroleum/ethyl acetate = 5/1),  $R_f$  = 0.4, 38 mg, yield = 61%;  $^1\text{H NMR}$  (400 MHz,  $\text{CDCl}_3$ )  $\delta$  7.73 – 7.69 (m, 1H), 7.35 – 7.27 (m, 2H), 7.12 – 7.09 (m, 1H), 7.04 (s, 1H), 6.93 (s, 2H), 6.38 (s, 1H), 5.81 (s, 1H), 3.73 (s, 3H), 3.67 (s, 3H), 2.37 (s, 6H), 2.14 (s, 3H);  $^{13}\text{C NMR}$  (100 MHz,  $\text{CDCl}_3$ )  $\delta$  172.8, 167.5, 144.5, 140.8, 139.5, 138.3, 133.1, 132.7, 132.2, 130.5, 129.3, 128.6, 127.8, 127.5, 127.1, 123.0, 89.9, 84.7, 60.9, 56.4, 53.2, 21.4, 14.8; **IR** (KBr,  $\text{cm}^{-1}$ ) 3852, 3741, 2923, 1781, 1733, 1602, 1447, 1376, 1266, 1158, 1077, 958, 857, 750; **HRMS** (ESI) Calcd for  $\text{C}_{26}\text{H}_{25}\text{O}_5$  ( $\text{M}+\text{H}$ )<sup>+</sup> 417.1697, found 417.1702.

**Methyl-8-chloro-9b-methoxy-3-methyl-1-oxo-4-phenyl-2a,9b-dihydrobenzo[5,6]indeno[1,7-*b*c]furan-2a<sup>1</sup>(1*H*)-carboxylate (3ah)**

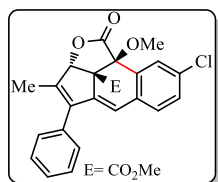

Yellow solid, m.p. = 146-147 °C, purified by chromatography (petroleum/ethyl acetate = 5/1),  $R_f$  = 0.5, 27 mg, yield = 46%;  $^1\text{H NMR}$  (400 MHz,  $\text{CDCl}_3$ )  $\delta$  7.69 (d,  $J$  = 2.0 Hz, 1H), 7.49 – 7.39 (m, 3H), 7.35 – 7.31 (m, 2H), 7.28 – 7.25 (m, 1H), 7.02 (d,  $J$  = 8.1 Hz, 1H), 6.34 (s, 1H), 5.82 (s, 1H), 3.72 (s, 3H), 3.67 (s, 3H), 2.16 (s, 3H);  $^{13}\text{C NMR}$  (100 MHz,  $\text{CDCl}_3$ )  $\delta$  172.2, 167.2, 144.2, 141.2, 140.2, 134.5, 134.3, 132.1, 131.6, 129.5, 129.4, 128.9, 128.8, 128.7, 128.2, 122.1, 89.9, 84.3, 60.9, 56.5, 53.3, 14.9; **IR** (KBr,  $\text{cm}^{-1}$ ) 3852, 3742, 3682, 2924, 1780, 1734, 1464, 1265, 1157, 1088, 955, 890, 703; **HRMS** (ESI) Calcd for  $\text{C}_{24}\text{H}_{19}\text{ClNaO}_5$  ( $\text{M}+\text{Na}$ )<sup>+</sup> 445.0813, found 445.0816.

## 1.5 Gram-scale reaction

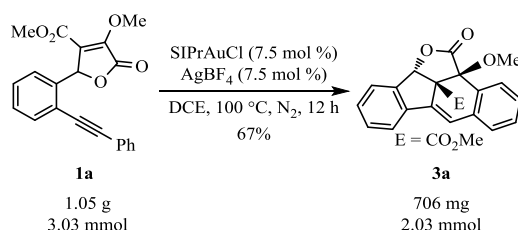

## 1.6 General procedure for derivatization reaction of 3a

### 1.6.1 Procedure for the synthesis of 4.

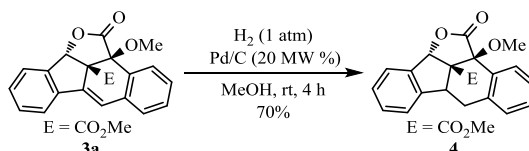

In a 25 mL Schlenk tube with a magnetic bar was added MeOH (2 mL), then the **3a** (0.2 mmol) and Pd/C (watted with ca. 55 % water) (20 MW %) were added respectively. The mixture was stirred at room temperature under 1 atm of  $\text{H}_2$  until the starting materials was completely consumed (monitored by TLC). After the reaction was finished, the mixture was filtered by short silica, then the solvent was evaporated under reduced pressure and the residue was purified by flash chromatography on silica gel

using petroleum ether and ethyl acetate (PE/EA = 5/1) as the eluent to obtain the desired product **4**.

**Methyl-2a-methoxy-2-oxo-2a,7,7a,11b-tetrahydrobenzo[2,3]fluoreno[9,1-*bc*]furan-2a<sup>1</sup>(2*H*)-carboxylate (**4**)**

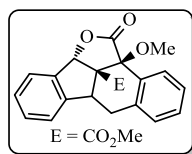

White solid, m.p. = 144 - 145 °C, purified by chromatography (petroleum/ethyl acetate = 5/1),  $R_f$  = 0.5, 49 mg, yield = 70%;  $^1\text{H NMR}$  (400 MHz,  $\text{CDCl}_3$ )  $\delta$  7.51 (d,  $J$  = 7.2 Hz, 1H), 7.37 (d,  $J$  = 7.5 Hz, 1H), 7.27 – 7.14 (m, 6H), 6.16 (s, 1H), 4.11 (dd,  $J$  = 5.9, 5.4 Hz, 1H), 3.78 (s, 3H), 3.44 – 3.36 (m, 4H), 2.90 (dd,  $J$  = 15.0, 6.8 Hz, 1H);  $^{13}\text{C NMR}$  (100 MHz,  $\text{CDCl}_3$ )  $\delta$  173.3, 171.2, 144.1, 137.6, 136.6, 131.1, 130.4, 129.4, 129.0, 128.1, 127.5, 126.8, 125.7, 124.1, 85.8, 81.2, 65.8, 54.0, 52.8, 45.8, 33.5; **IR** (KBr,  $\text{cm}^{-1}$ ) 2946, 2842, 1777, 1737, 1448, 1341, 1298, 1253, 1169, 1093, 988, 754, 658, 536; **HRMS** (ESI) Calcd for  $\text{C}_{21}\text{H}_{18}\text{O}_5\text{Na}$  ( $\text{M}+\text{Na}$ )<sup>+</sup> 373.1046, found 373.1049.

**1.6.2 Procedure for the synthesis of **5**.**

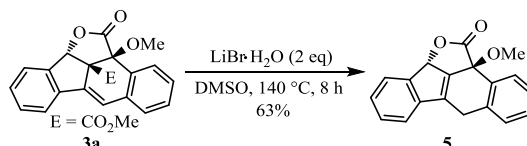

In a 25 mL Schlenk tube with a magnetic bar under nitrogen atmosphere was added DMSO (2 mL), and then the **3a** (0.2 mmol) and Lithium bromide hydrate (0.4 mmol) were added respectively. The mixture was stirred at 140 °C until the starting materials was completely consumed (monitored by TLC). The solution was cooled to room temperature, taken up in  $\text{H}_2\text{O}$  (5 mL) and extracted with ethyl acetate (1 X 1 mL and 3 X 1 mL). The combined organic extracts were washed with water and brine, dried over  $\text{Na}_2\text{SO}_4$ , and evaporated to dryness. The residue was purified by flash chromatography on silica gel using petroleum ether and ethyl acetate (PE/EA = 5/1) as the eluent to afford the products **5**.

**2a-methoxy-7,11b-dihydrobenzo[2,3]fluoreno[9,1-*bc*]furan-2(2a*H*)-one (**5**)**

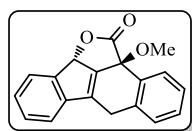

Pale yellow viscous oil, purified by chromatography (petroleum/ethyl acetate = 5/1),  $R_f$  = 0.7, 37 mg, yield = 63%;  $^1\text{H NMR}$  (400 MHz,  $\text{CDCl}_3$ )  $\delta$  8.25 – 8.21 (m, 1H), 7.99 (s, 1H), 7.94 – 7.91 (m, 2H), 7.59 (d,  $J$  = 7.3 Hz, 1H), 7.53 – 7.48 (m, 2H), 7.45 – 7.35 (m, 2H), 4.18 (s, 2H), 4.15 (s, 3H);  $^{13}\text{C NMR}$  (100 MHz,  $\text{CDCl}_3$ )  $\delta$  152.0, 143.5, 142.0, 141.2, 135.1, 128.7, 128.3, 127.8, 127.4, 127.1, 126.0, 125.4, 125.3, 122.1, 120.7, 113.9, 60.6, 60.5, 34.9; **IR** (KBr,  $\text{cm}^{-1}$ ) 3056, 2931, 2846, 1937, 1826, 1730, 1636, 1575, 1501, 1455, 1409, 1332, 1278, 1195, 1140, 1093, 995, 945, 849, 761, 730, 671, 577, 541, 452; **HRMS** (ESI) Calcd for  $\text{C}_{19}\text{H}_{15}\text{O}_3$  ( $\text{M}+\text{H}$ )<sup>+</sup> 291.1016, found 291.0860.

## 2. References:

- [1] K. Luo, T. Cao, H. Jiang, L. Chen and S. Zhu, *Org. Lett.*, 2017, **19**, 5856-5859.
- [2] S. Zhu, X. Huang, T. Zhao, T. Ma and H. Jiang, *Org. Biomol. Chem.*, 2015, **13**, 1225-1233.

### 3. X-ray diffraction analysis

#### 3.1 Crystal data and structure refinement for **3a**

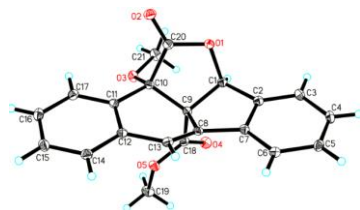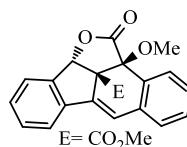

|                                   |                                                               |                  |
|-----------------------------------|---------------------------------------------------------------|------------------|
| CCDC number                       | 1586574                                                       |                  |
| Identification code               | <b>3a</b>                                                     |                  |
| Empirical formula                 | C <sub>21</sub> H <sub>16</sub> O <sub>5</sub>                |                  |
| Formula weight                    | 348.34                                                        |                  |
| Temperature                       | 100.00(10) K                                                  |                  |
| Crystal system                    | monoclinic                                                    |                  |
| Space group                       | P2 <sub>1</sub> /n                                            |                  |
| Unit cell dimensions              | a = 12.2774(7) Å                                              | α = 90 °         |
|                                   | b = 10.4052(7) Å                                              | β = 101.928(5) ° |
|                                   | c = 13.0395(7) Å                                              | γ = 90 °         |
| Volume                            | 1629.82(17) Å <sup>3</sup>                                    |                  |
| Z                                 | 4                                                             |                  |
| ρ <sub>calc</sub>                 | 1.420 g/cm <sup>3</sup>                                       |                  |
| μ                                 | 0.102 mm <sup>-1</sup>                                        |                  |
| F(000)                            | 728.0                                                         |                  |
| Crystal size                      | 0.17 × 0.12 × 0.1 mm <sup>3</sup>                             |                  |
| Radiation                         | MoKα (λ = 0.71073)                                            |                  |
| 2θ range for data collection      | 6.444 to 59.096 °                                             |                  |
| Index ranges                      | -15 ≤ h ≤ 12, -7 ≤ k ≤ 13, -16 ≤ l ≤ 17                       |                  |
| Reflections collected             | 8320                                                          |                  |
| Independent reflections           | 3801 [R <sub>int</sub> = 0.0369, R <sub>sigma</sub> = 0.0566] |                  |
| Data / restraints / parameters    | 3801/0/237                                                    |                  |
| Goodness-of-fit on F <sup>2</sup> | 1.043                                                         |                  |
| Final R indexes [I >= 2σ (I)]     | R <sub>1</sub> = 0.0510, wR <sub>2</sub> = 0.1123             |                  |
| Final R indexes [all data]        | R <sub>1</sub> = 0.0685, wR <sub>2</sub> = 0.1237             |                  |
| Largest diff. peak/hole           | 0.34/-0.25 e.Å <sup>-3</sup>                                  |                  |

### 3.2 Crystal data and structure refinement for 3l

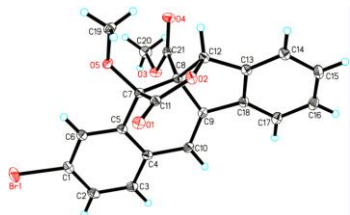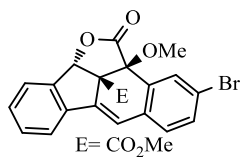

|                                         |                                                                   |                            |
|-----------------------------------------|-------------------------------------------------------------------|----------------------------|
| CCDC number                             | 1586587                                                           |                            |
| Identification code                     | <b>3l</b>                                                         |                            |
| Empirical formula                       | $C_{21}H_{15}BrO_5$                                               |                            |
| Formula weight                          | 427.24                                                            |                            |
| Temperature                             | 150.00(10) K                                                      |                            |
| Crystal system                          | triclinic                                                         |                            |
| Space group                             | P-1                                                               |                            |
| Unit cell dimensions                    | $a = 8.0941(2) \text{ \AA}$                                       | $\alpha = 70.653(2)^\circ$ |
|                                         | $b = 9.6765(2) \text{ \AA}$                                       | $\beta = 81.146(2)^\circ$  |
|                                         | $c = 11.9451(3) \text{ \AA}$                                      | $\gamma = 88.316(2)^\circ$ |
| Volume                                  | $871.99(4) \text{ \AA}^3$                                         |                            |
| Z                                       | 2                                                                 |                            |
| $\rho_{\text{calc}}$                    | $1.627 \text{ g/cm}^3$                                            |                            |
| $\mu$                                   | $3.490 \text{ mm}^{-1}$                                           |                            |
| F(000)                                  | 432.0                                                             |                            |
| Crystal size                            | $0.18 \times 0.15 \times 0.11 \text{ mm}^3$                       |                            |
| Radiation                               | $\text{CuK}\alpha$ ( $\lambda = 1.54184$ )                        |                            |
| $2\theta$ range for data collection     | $7.938$ to $148.924^\circ$                                        |                            |
| Index ranges                            | $-10 \leq h \leq 6$ , $-12 \leq k \leq 11$ , $-14 \leq l \leq 14$ |                            |
| Reflections collected                   | 8346                                                              |                            |
| Independent reflections                 | 3413 [ $R_{\text{int}} = 0.0245$ , $R_{\text{sigma}} = 0.0234$ ]  |                            |
| Data / restraints / parameters          | 3413/0/246                                                        |                            |
| Goodness-of-fit on $F^2$                | 1.078                                                             |                            |
| Final R indexes [ $I \geq 2\sigma(I)$ ] | $R_1 = 0.0319$ , $wR_2 = 0.0867$                                  |                            |
| Final R indexes [all data]              | $R_1 = 0.0331$ , $wR_2 = 0.0874$                                  |                            |
| Largest diff. peak/hole                 | $0.33/-0.64 \text{ e.\AA}^{-3}$                                   |                            |

### 3.3 Crystal data and structure refinement for 3aa

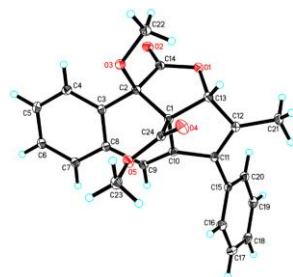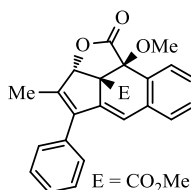

|                                   |                                                               |            |
|-----------------------------------|---------------------------------------------------------------|------------|
| CCDC number                       | 1526307                                                       |            |
| Identification code               | <b>3aa</b>                                                    |            |
| Empirical formula                 | C <sub>24</sub> H <sub>20</sub> O <sub>5</sub>                |            |
| Formula weight                    | 388.40                                                        |            |
| Temperature                       | 100.00(10) K                                                  |            |
| Crystal system                    | orthorhombic                                                  |            |
| Space group                       | Pbca                                                          |            |
| Unit cell dimensions              | a = 9.52631(13) Å                                             | α = 90.0 ° |
|                                   | b = 14.5795(3) Å                                              | β = 90.0 ° |
|                                   | c = 26.9344(4) Å                                              | γ = 90.0 ° |
| Volume                            | 3740.88(10) Å <sup>3</sup>                                    |            |
| Z                                 | 8                                                             |            |
| ρ <sub>calc</sub>                 | 1.379 g/cm <sup>3</sup>                                       |            |
| μ                                 | 0.789 mm <sup>-1</sup>                                        |            |
| F(000)                            | 1632.0                                                        |            |
| Crystal size                      | 0.28 x 0.24 x 0.18 mm <sup>3</sup>                            |            |
| Radiation                         | Cu Kα (λ = 1.54184)                                           |            |
| 2θ range for data collection      | 11.572 to 147.016 °                                           |            |
| Index ranges                      | -8 ≤ h ≤ 11, -17 ≤ k ≤ 14, -33 ≤ l ≤ 32                       |            |
| Reflections collected             | 18297                                                         |            |
| Independent reflections           | 3625 [R <sub>int</sub> = 0.0226, R <sub>sigma</sub> = 0.0135] |            |
| Data / restraints / parameters    | 3625 / 0 / 265                                                |            |
| Goodness-of-fit on F <sup>2</sup> | 1.071                                                         |            |
| Final R indexes [I ≥ 2σ (I)]      | R1 = 0.0424, wR2 = 0.1071                                     |            |
| Final R indexes [all data]        | R1 = 0.0437, wR2 = 0.1081                                     |            |
| Largest diff. peak/hole           | 0.25/-0.29 e.Å <sup>-3</sup>                                  |            |

#### 4. Copies of NMR spectra

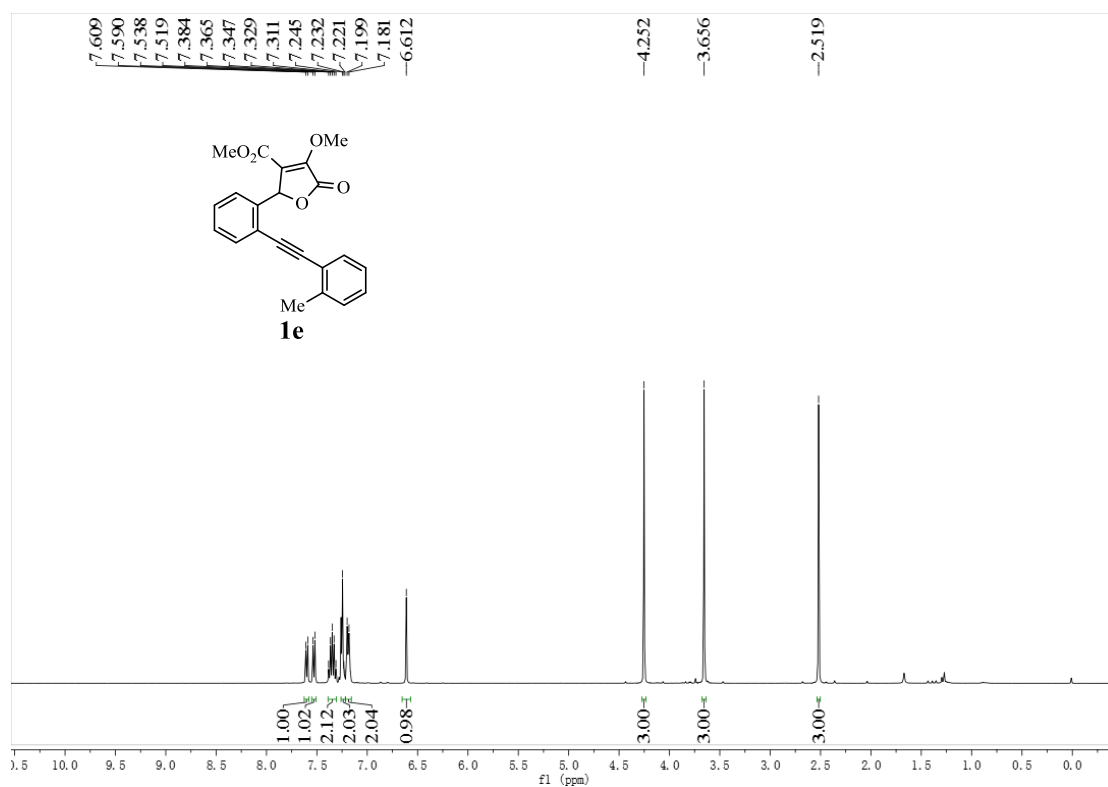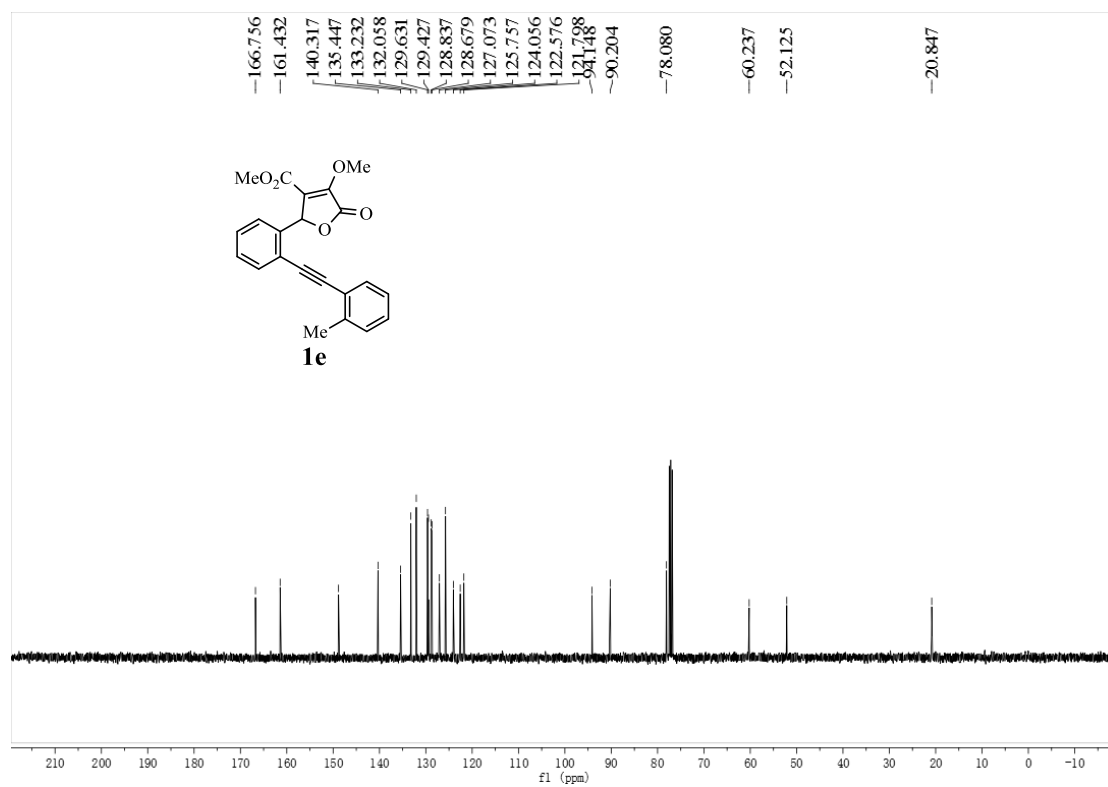

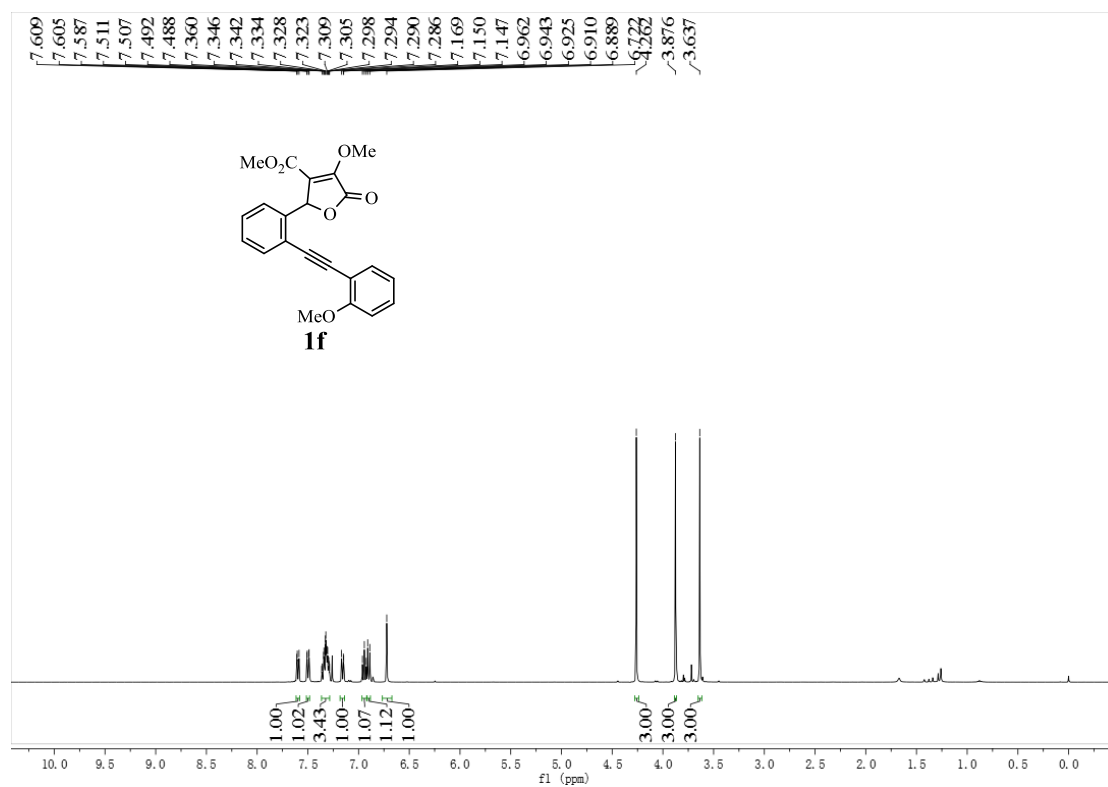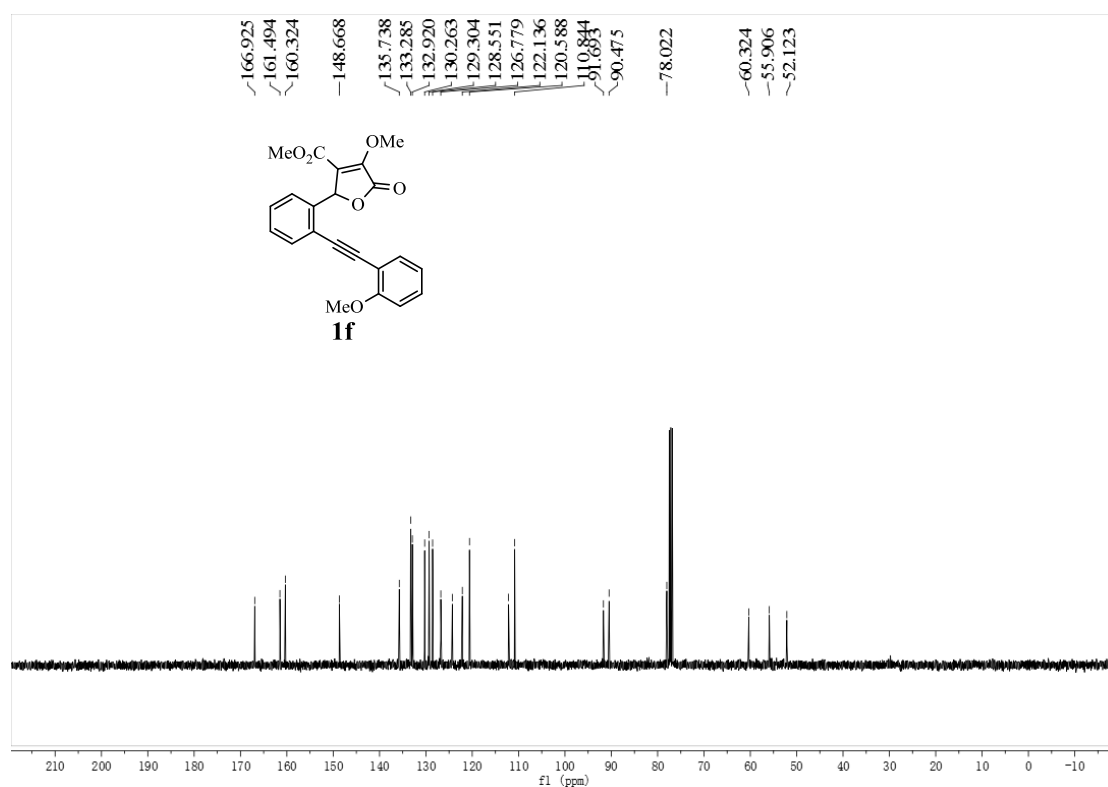

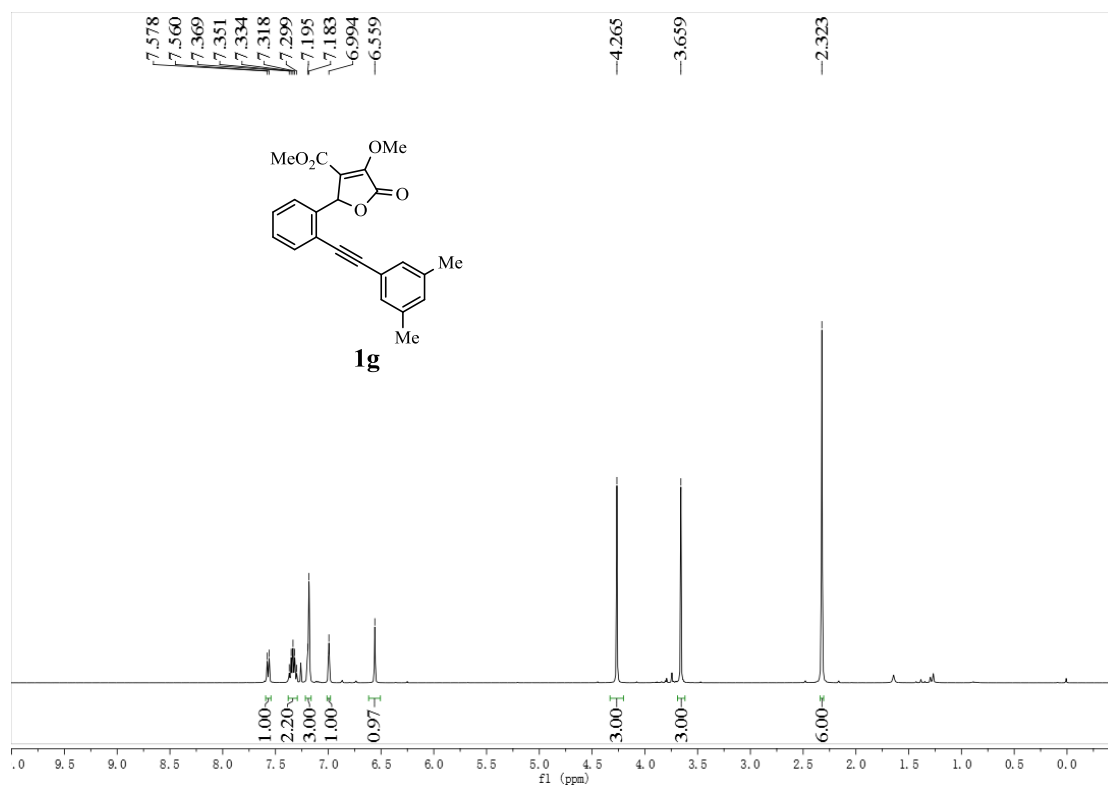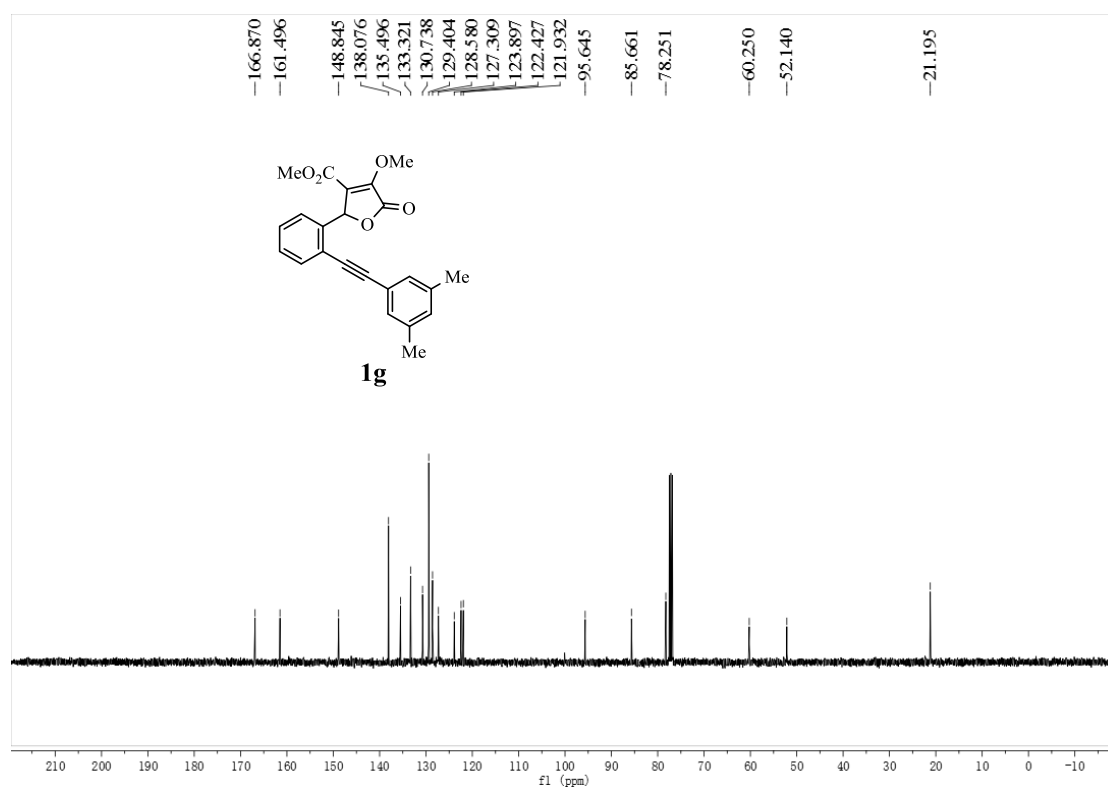

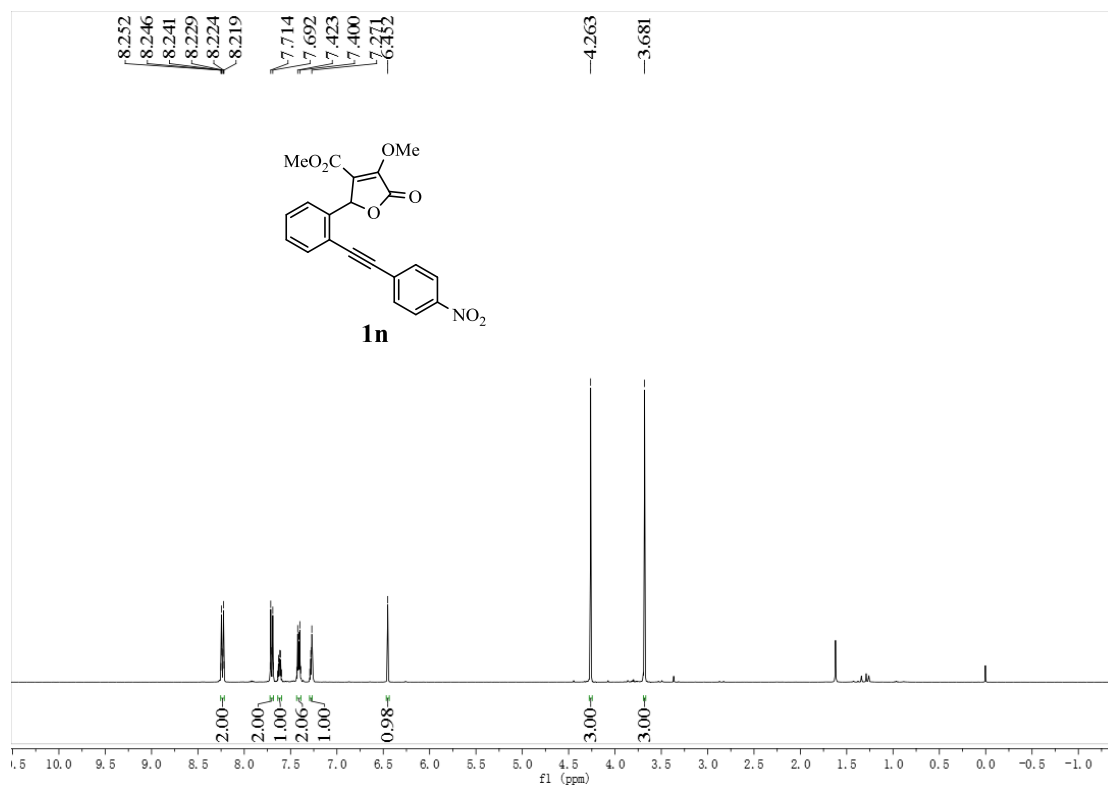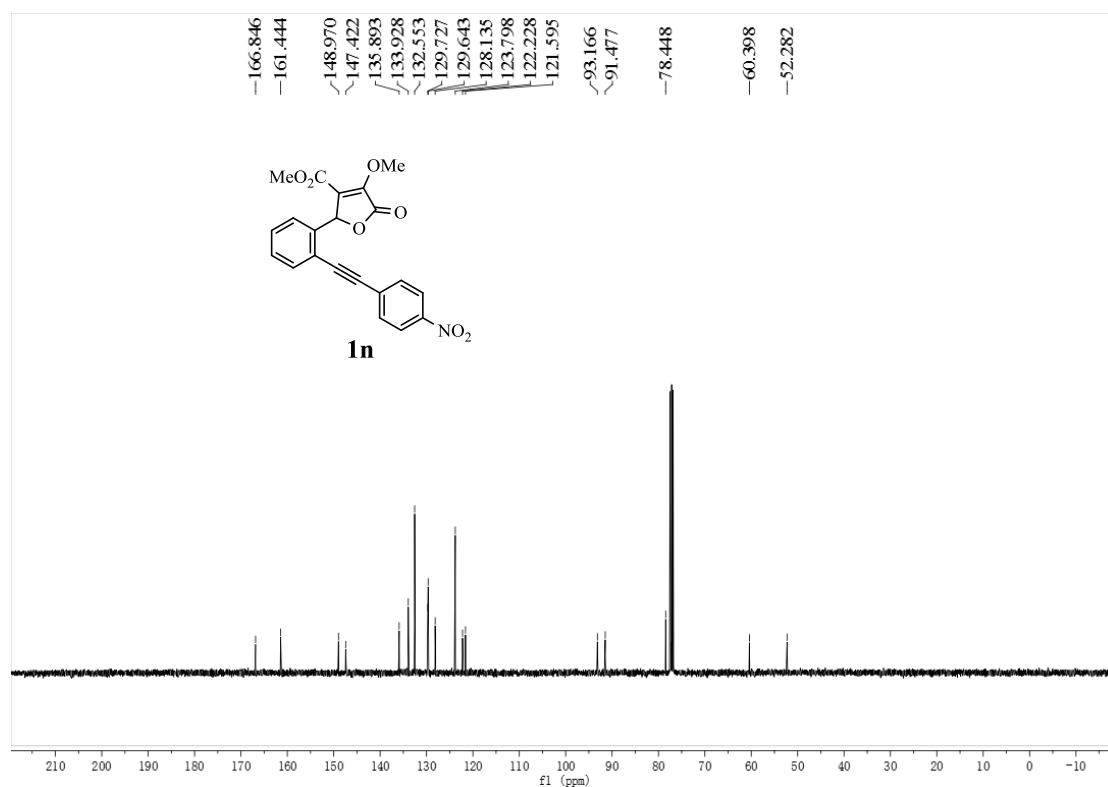

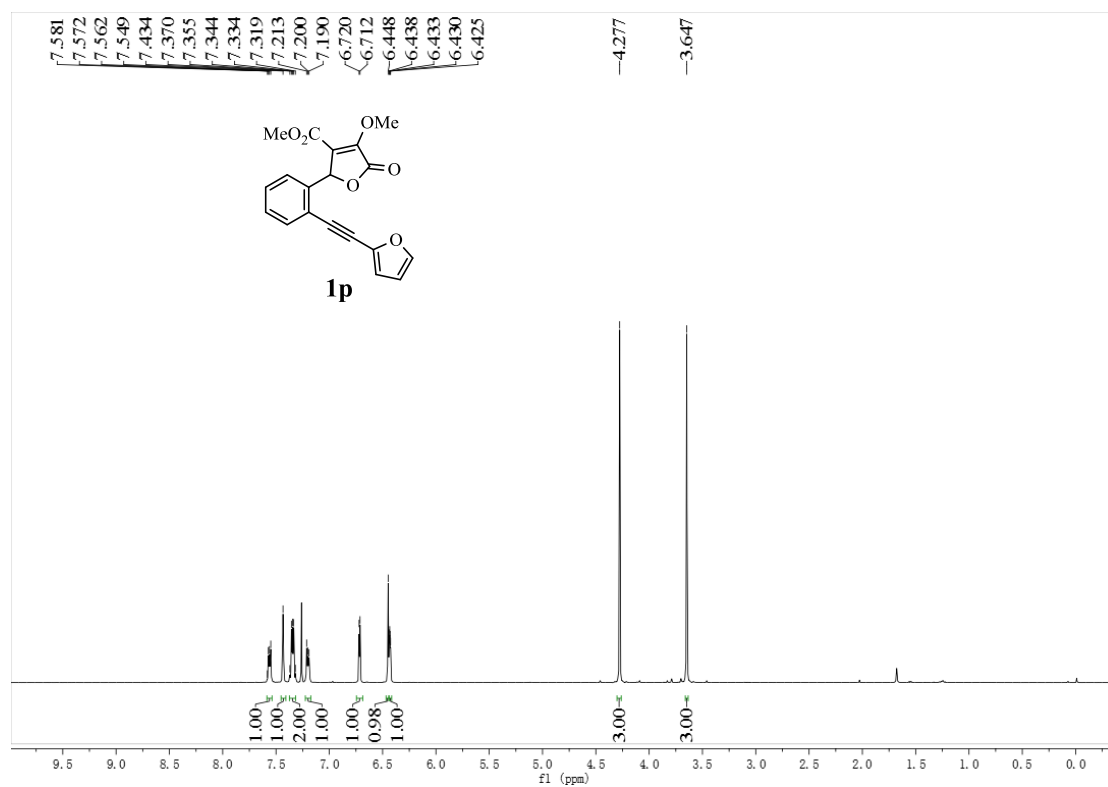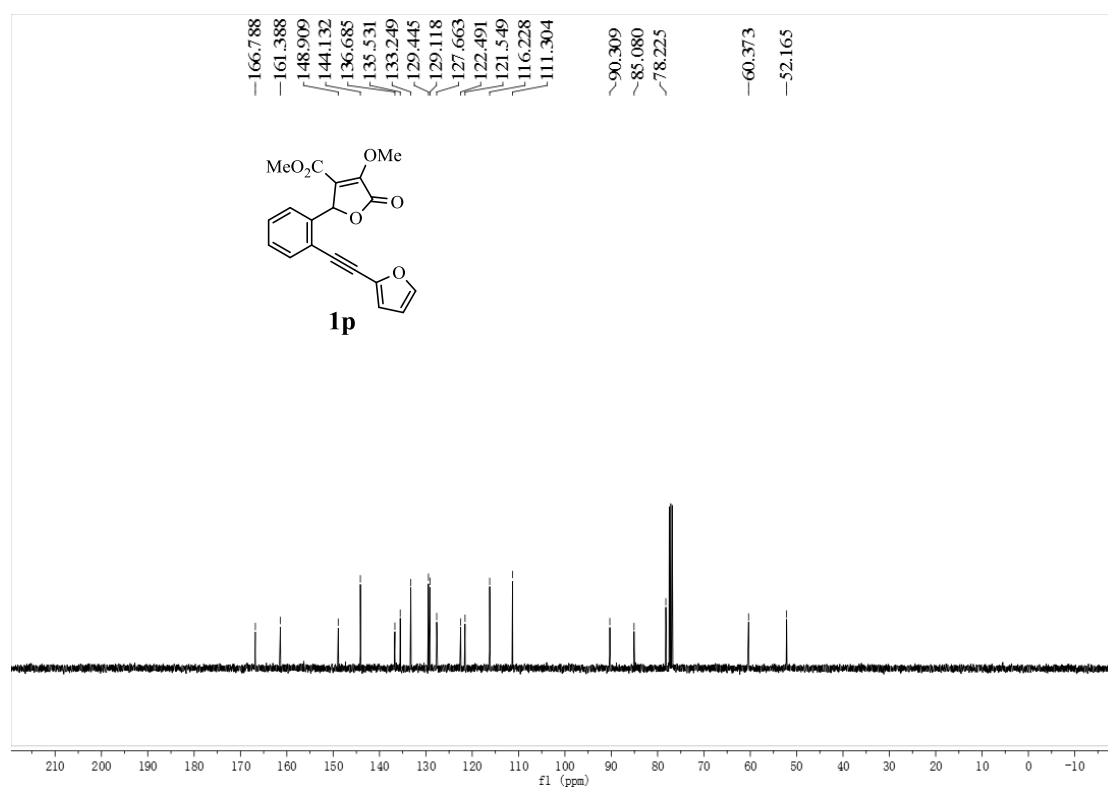

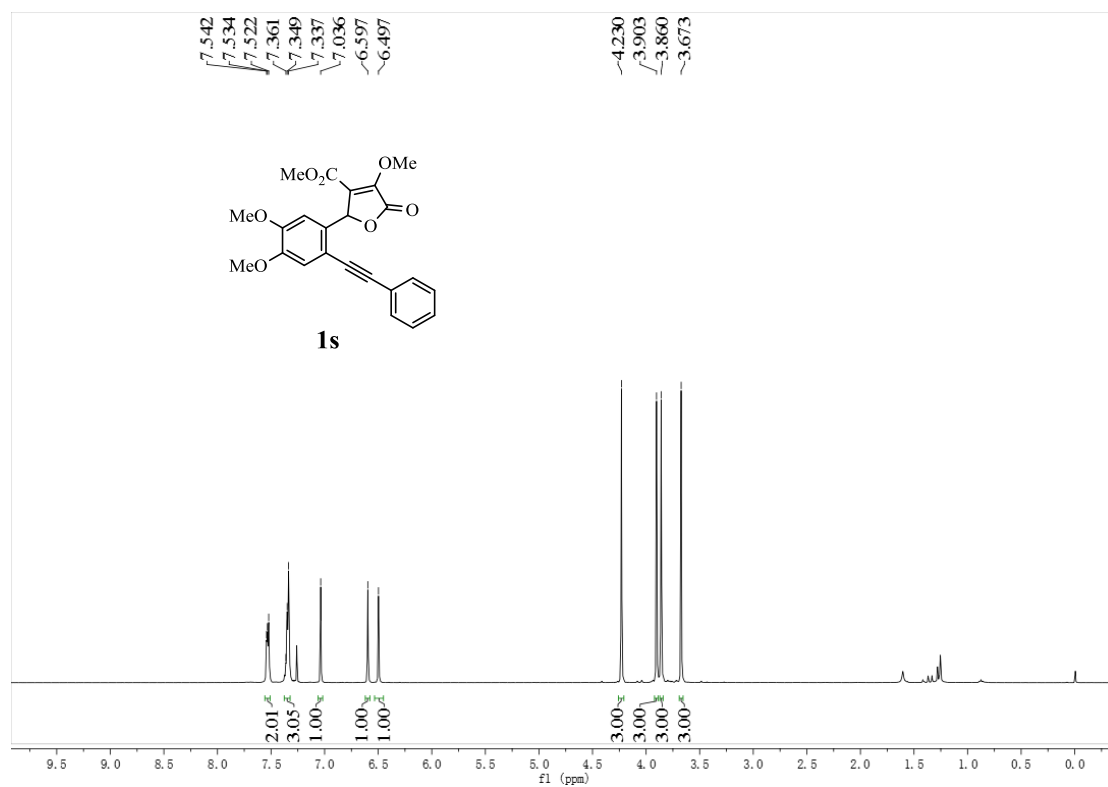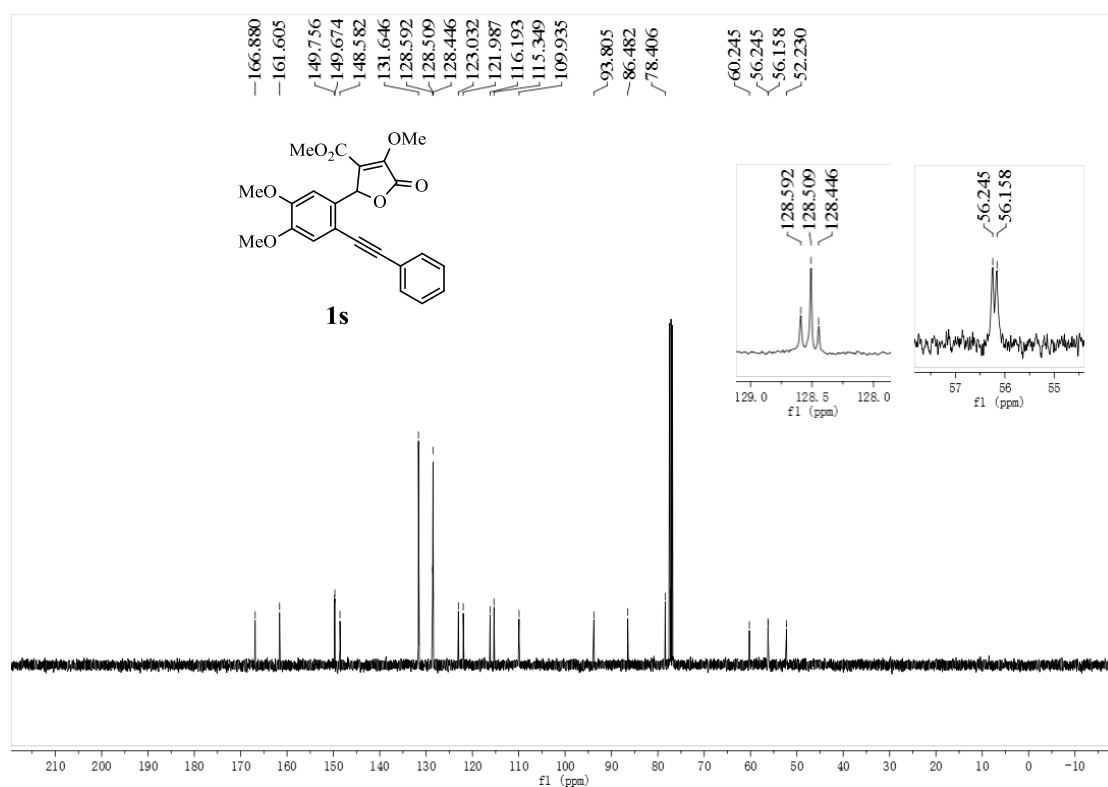

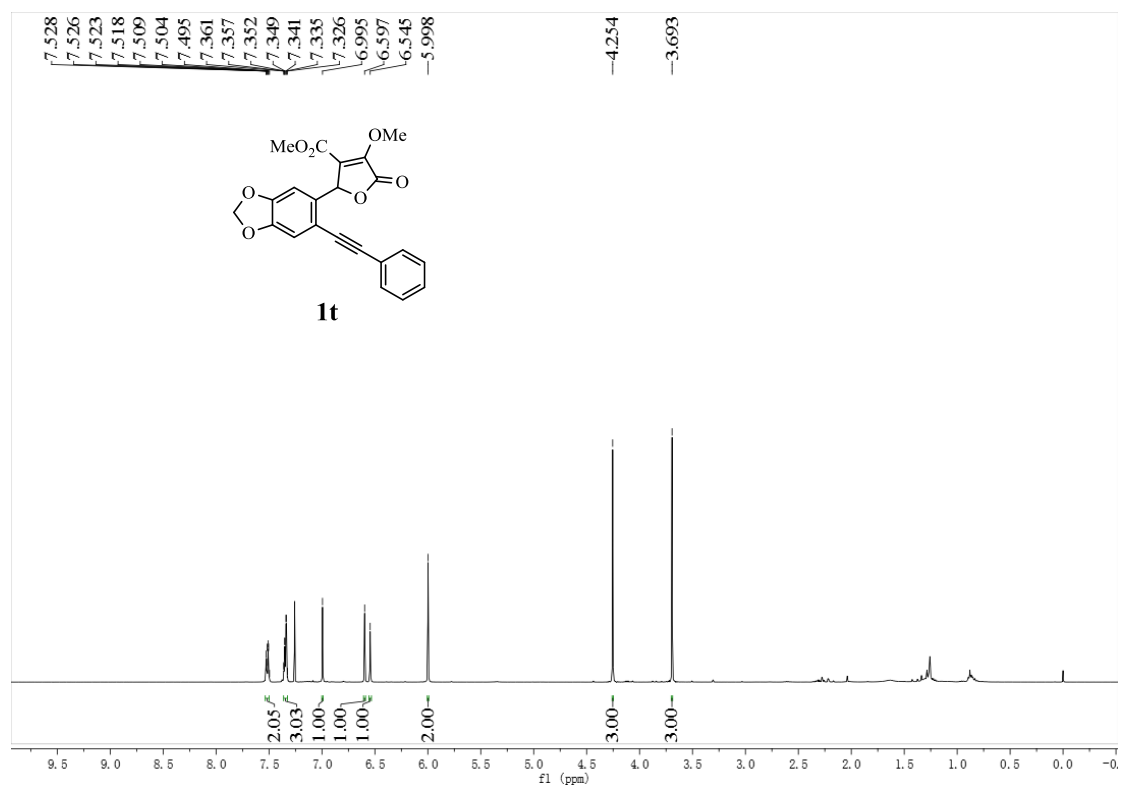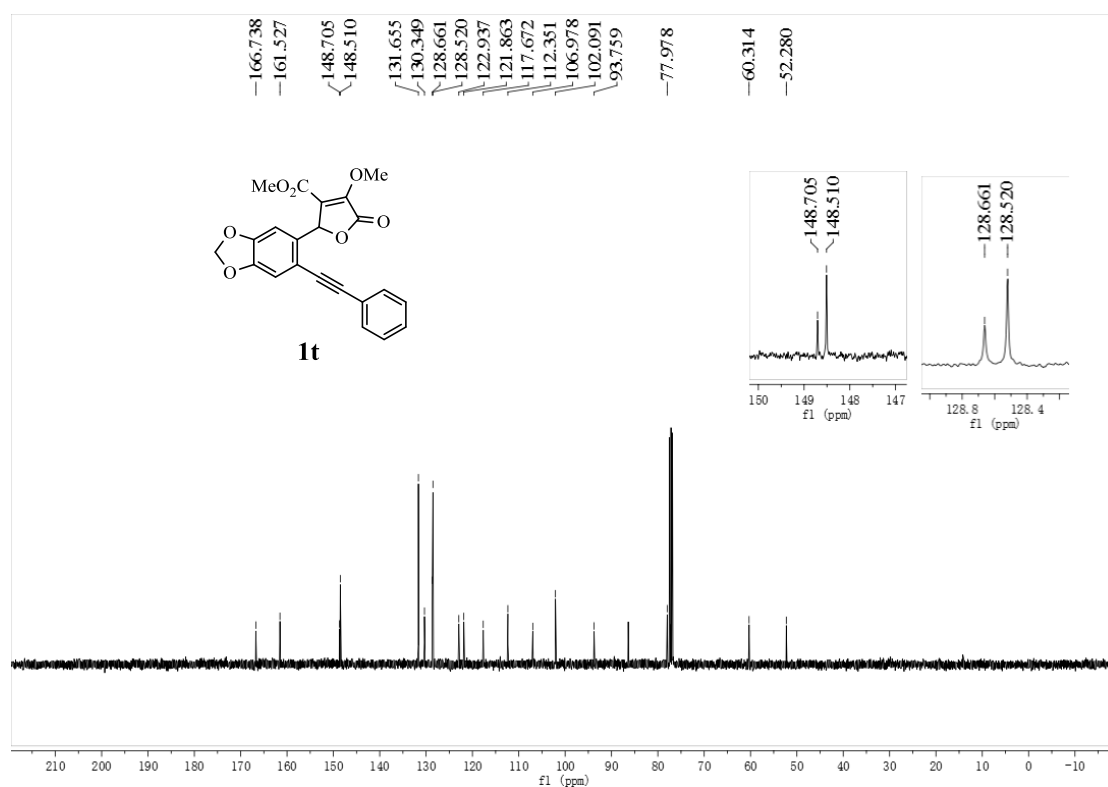

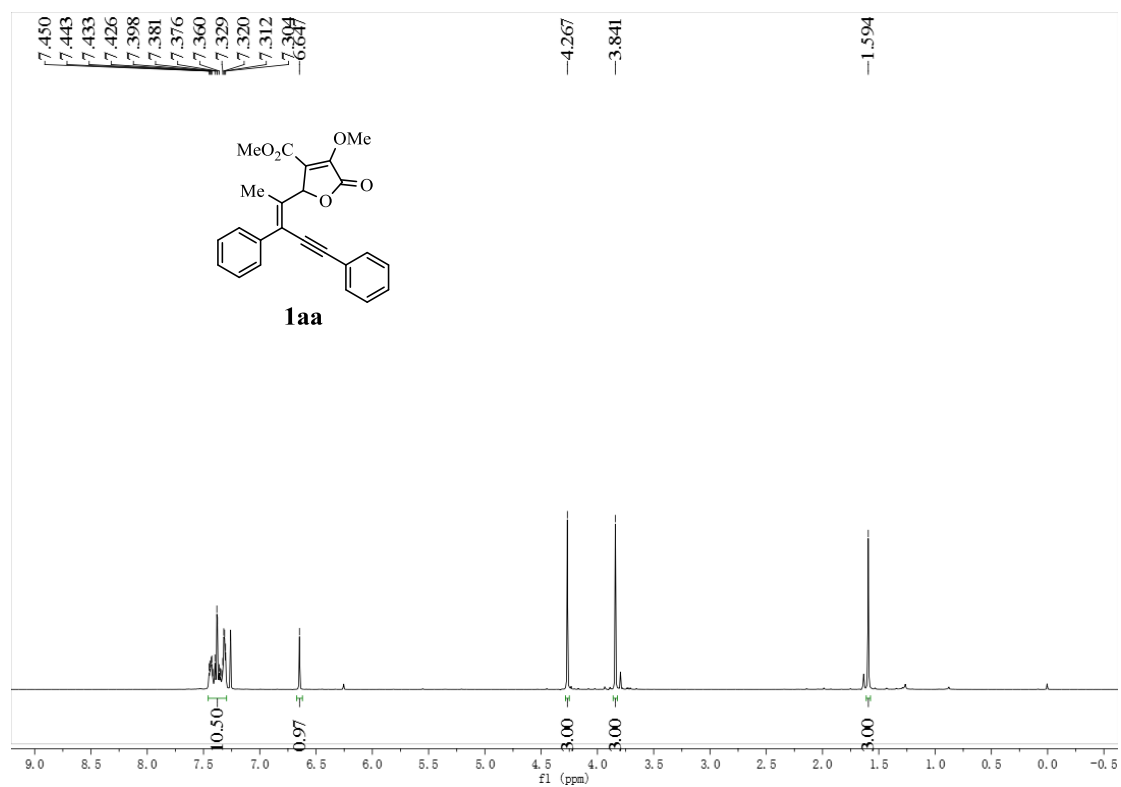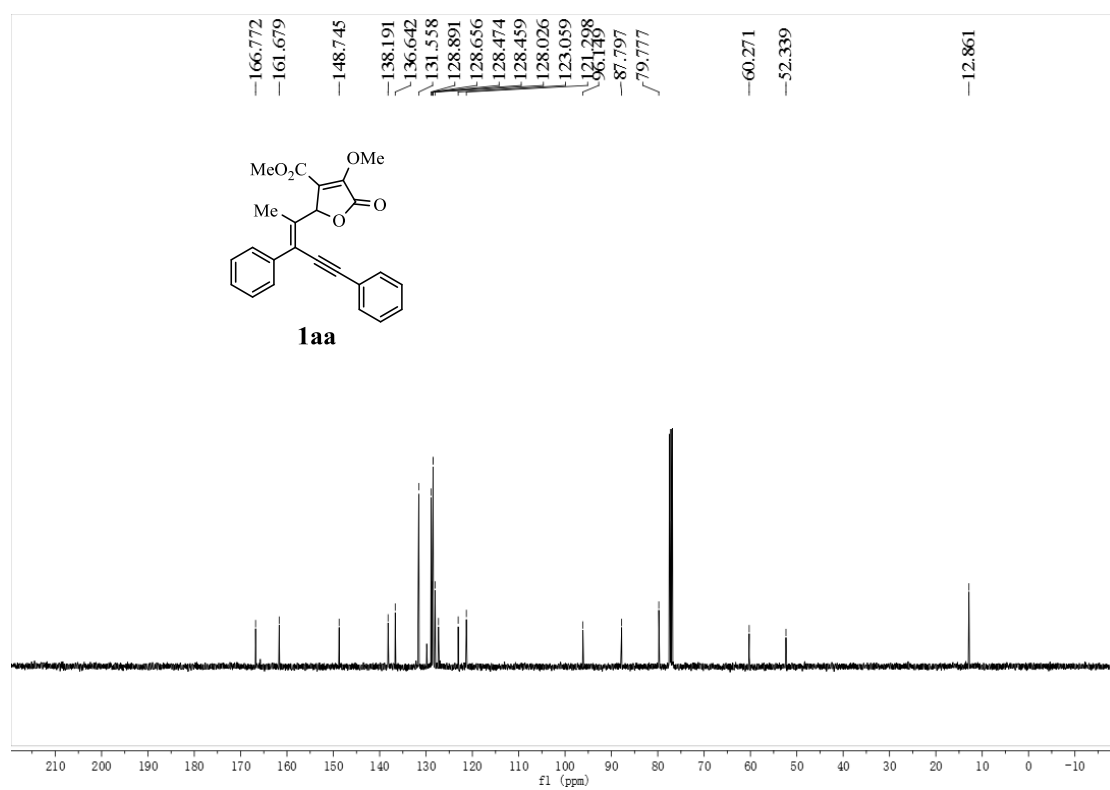

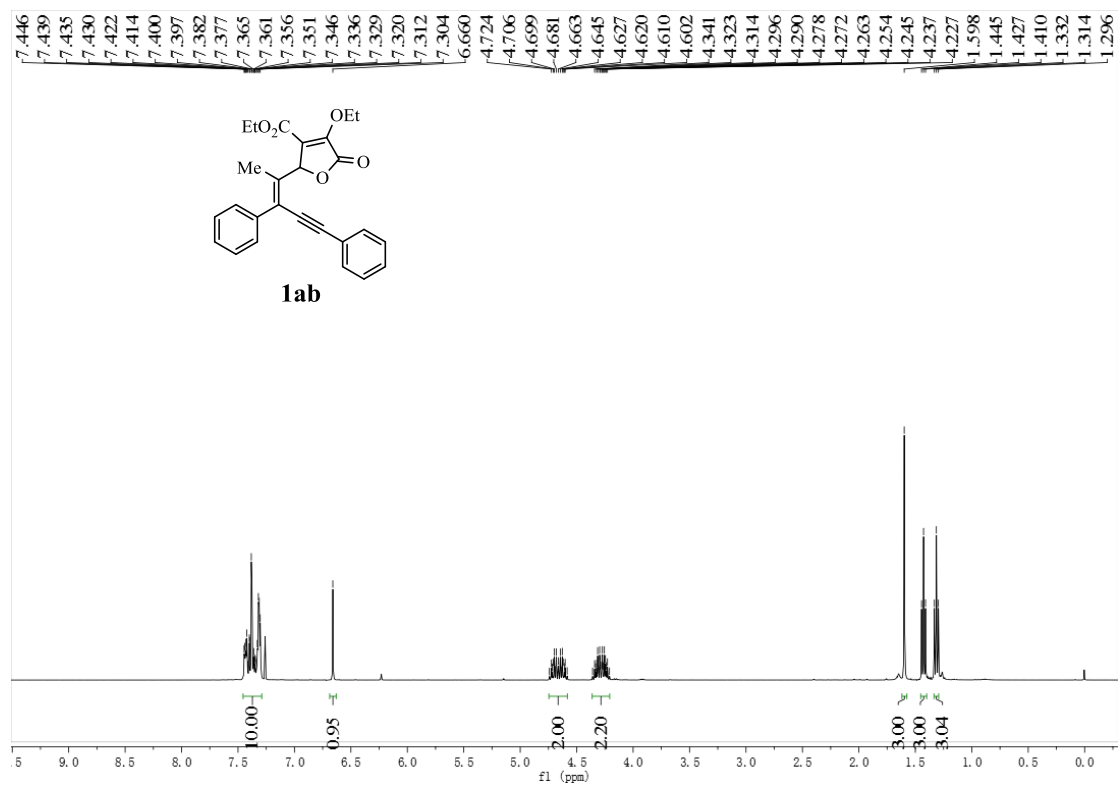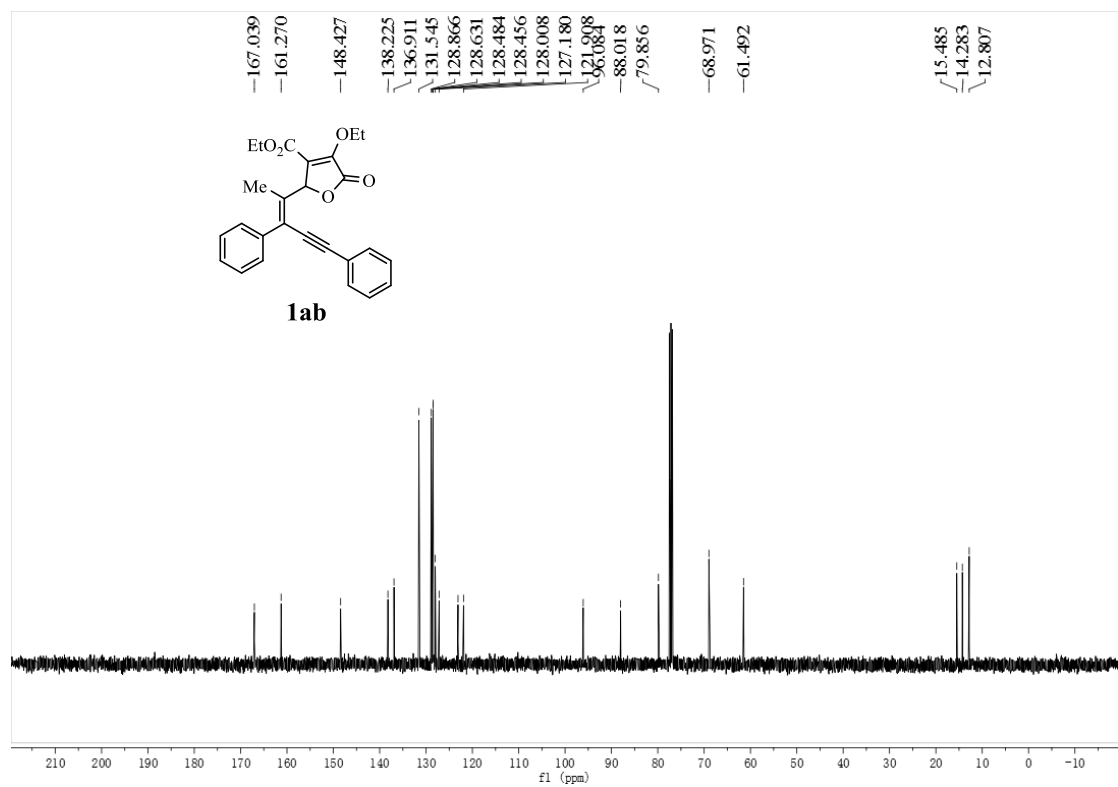

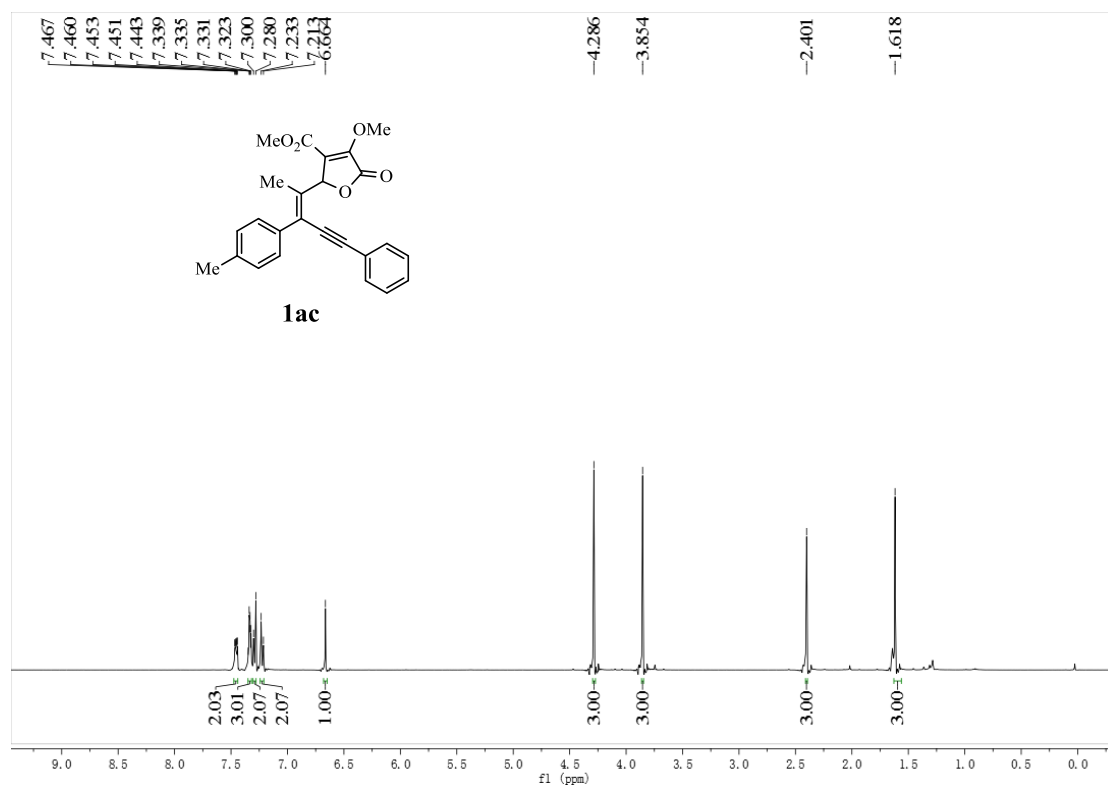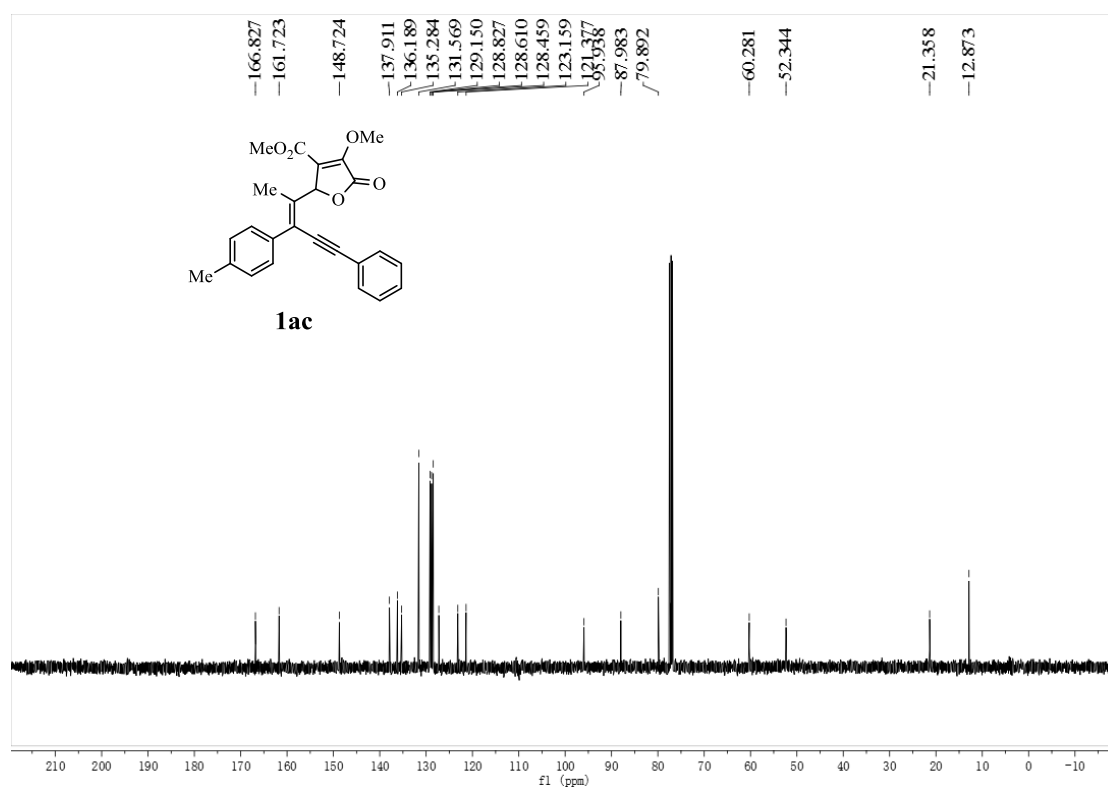

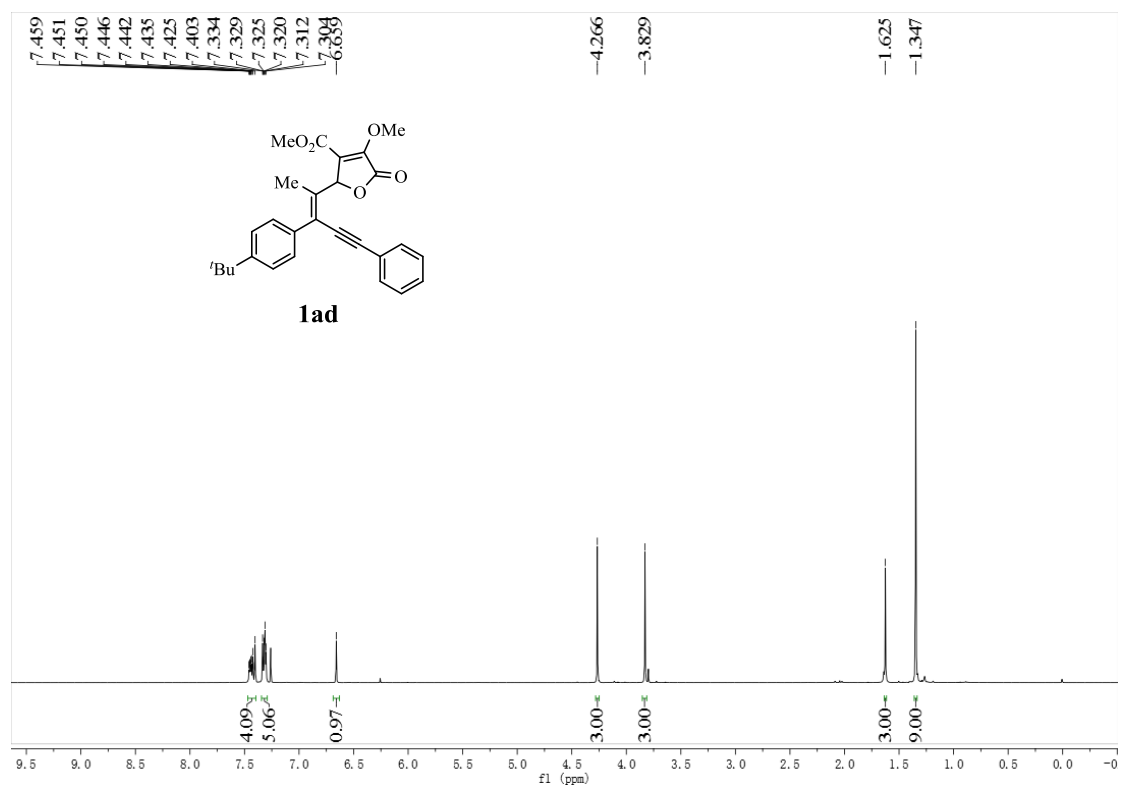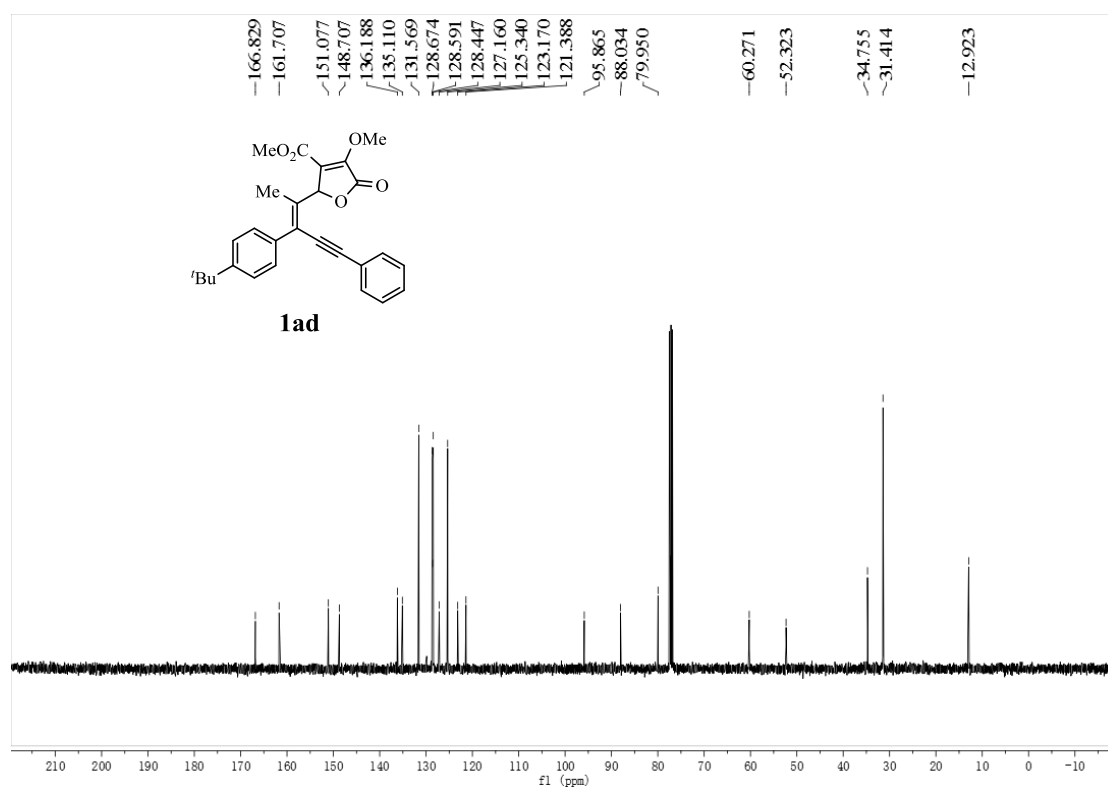

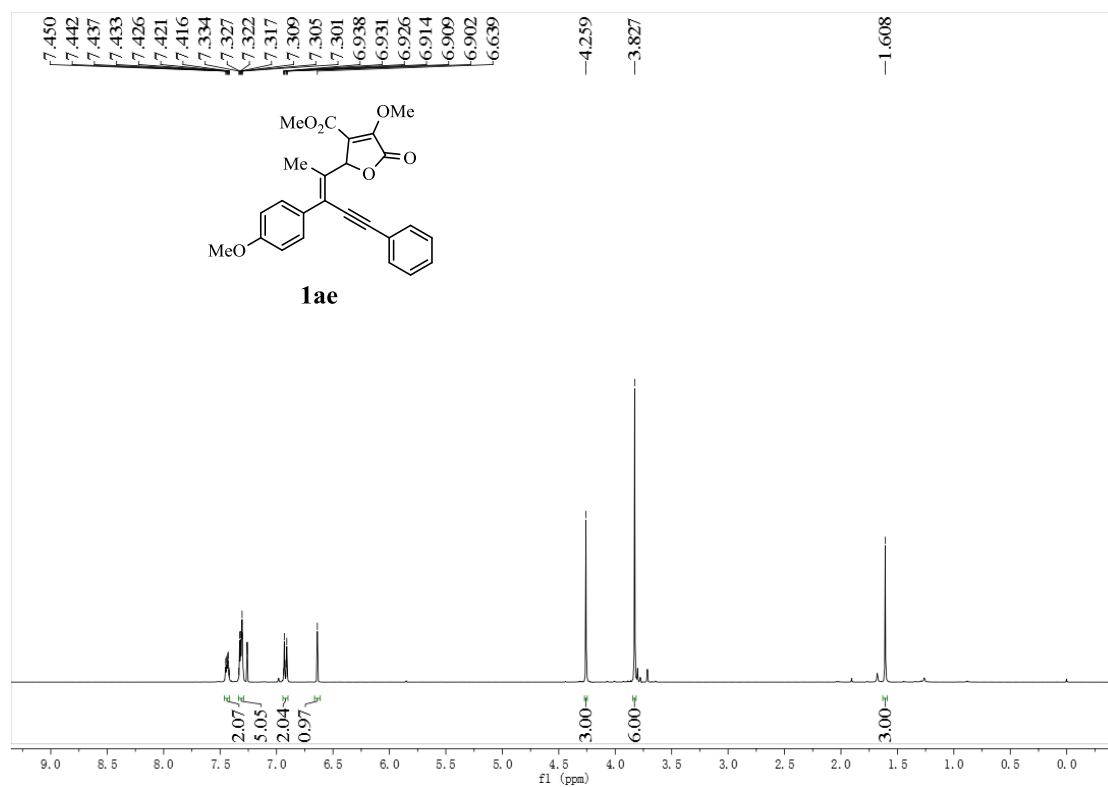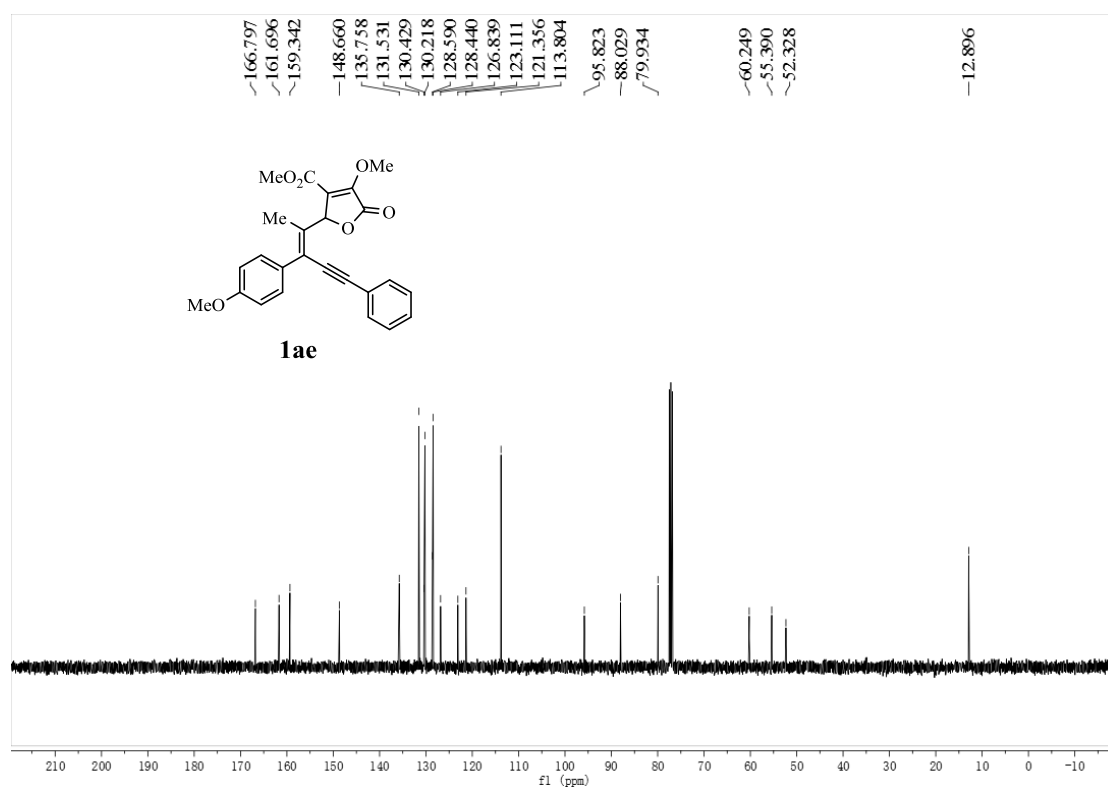

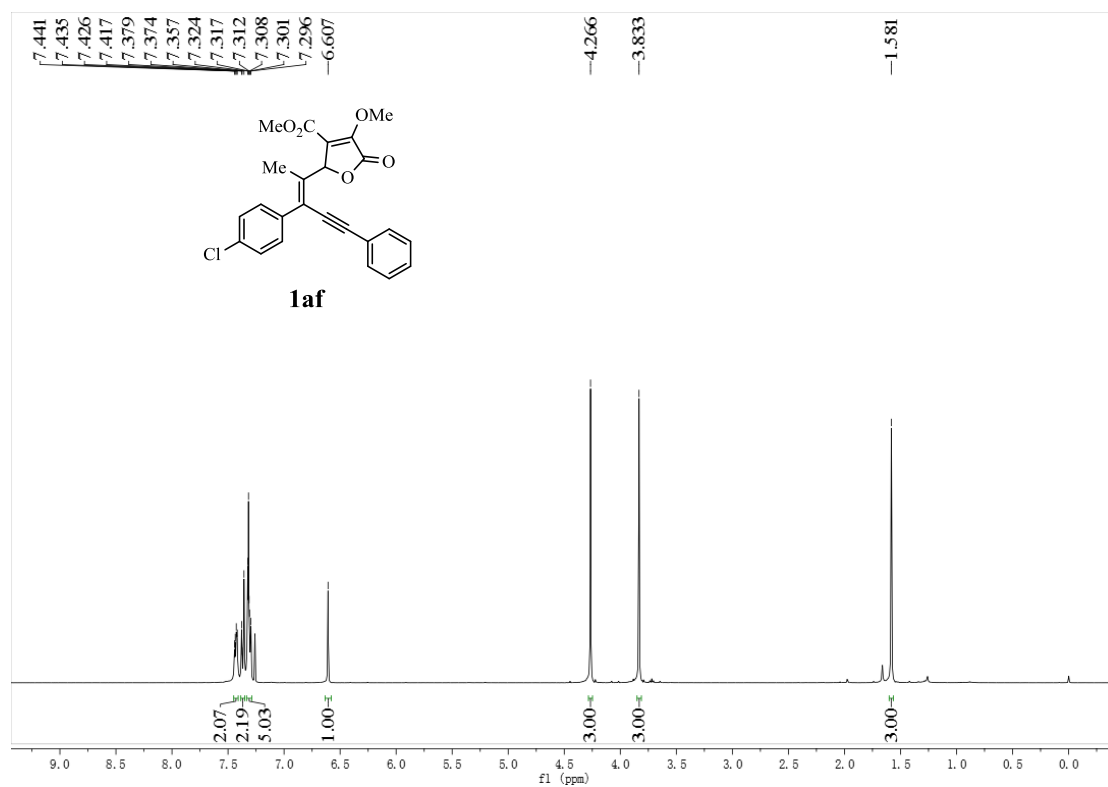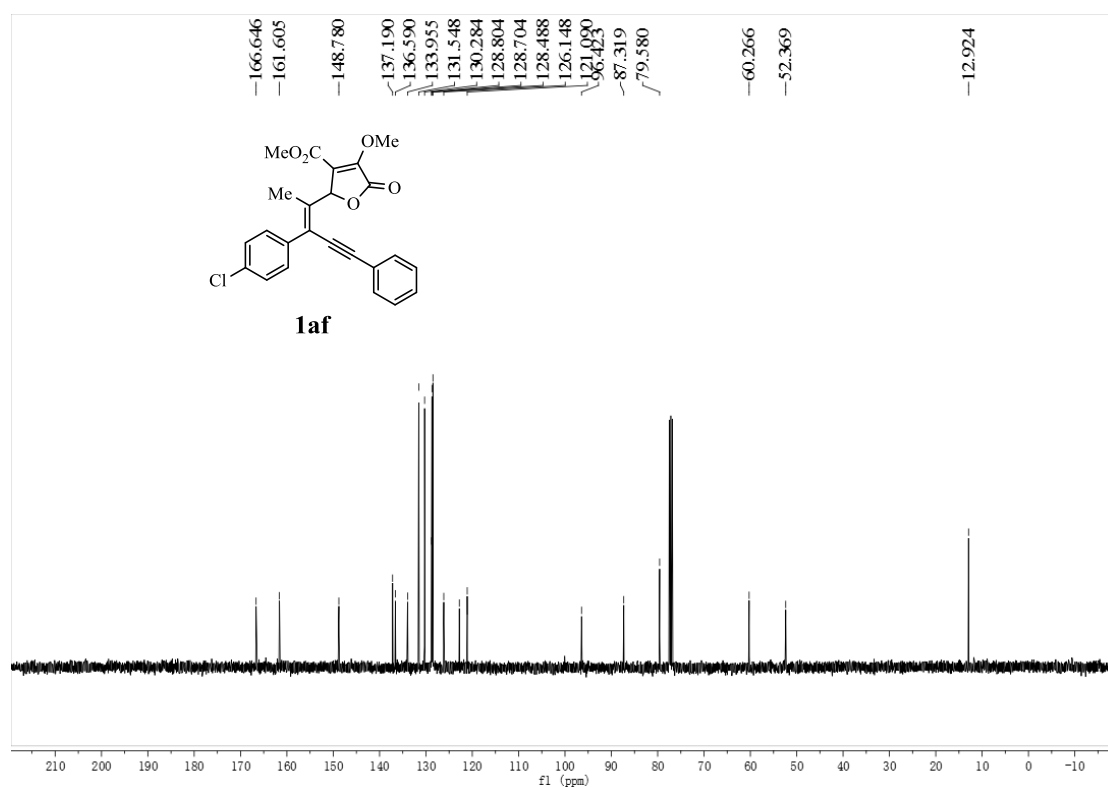

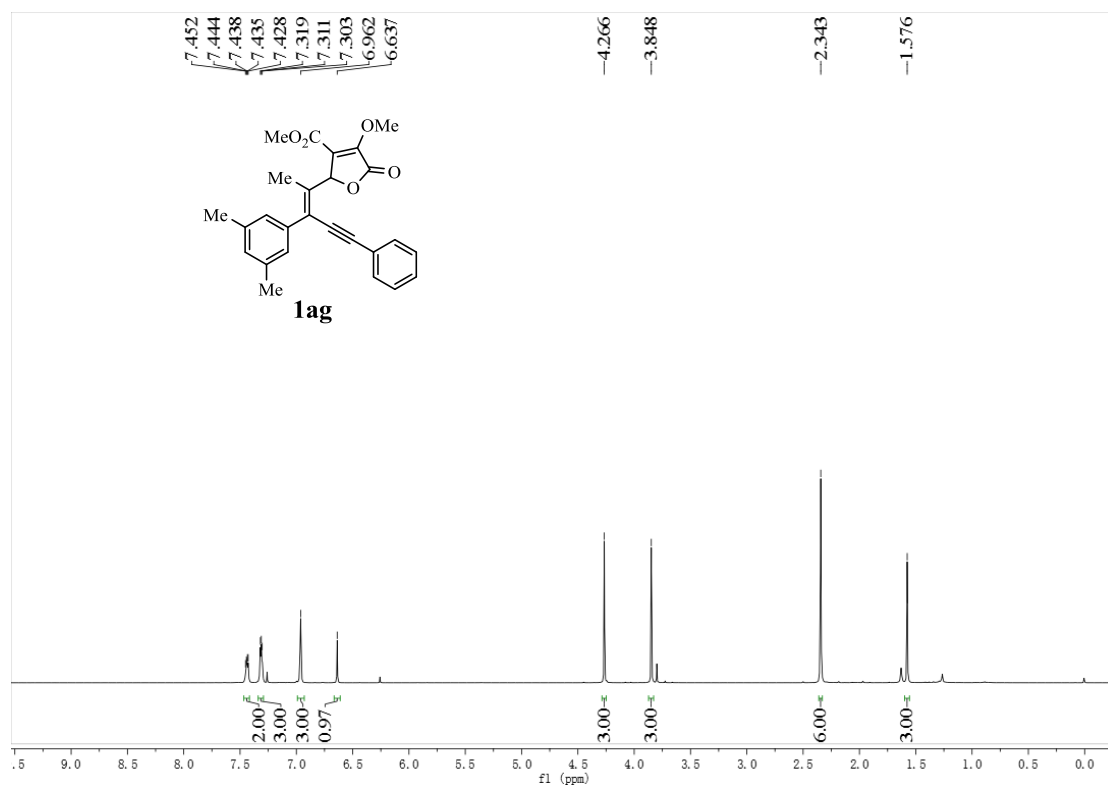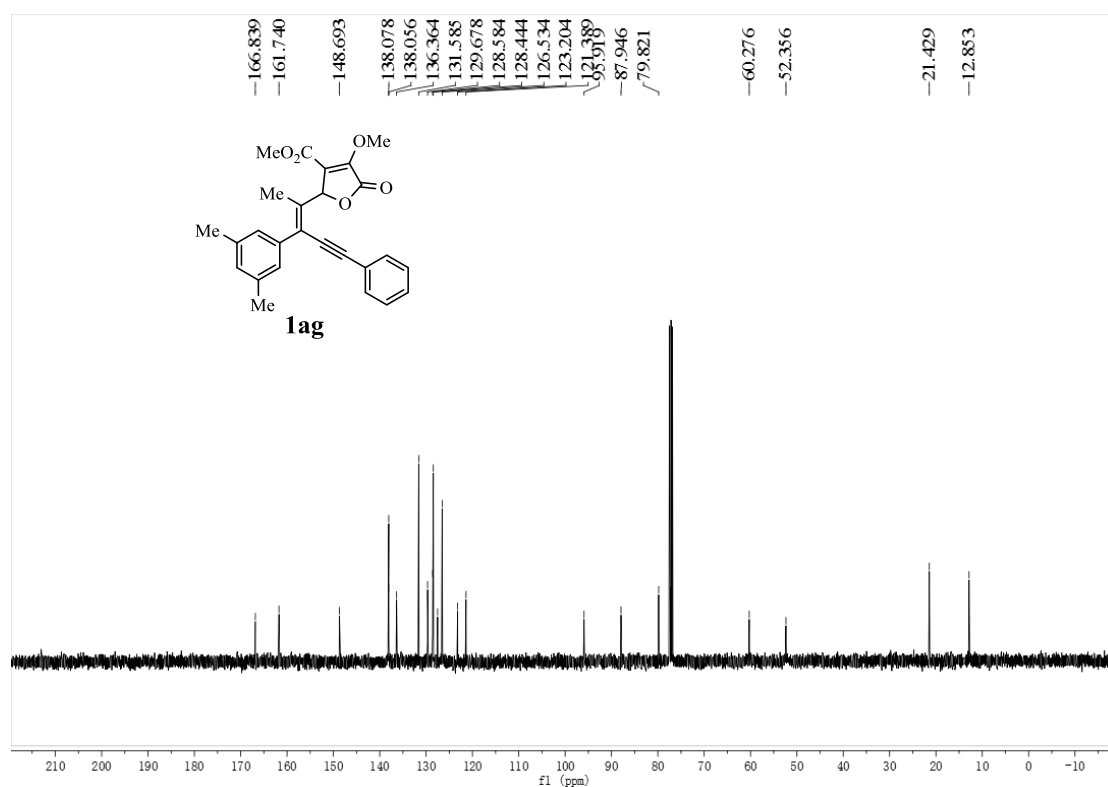

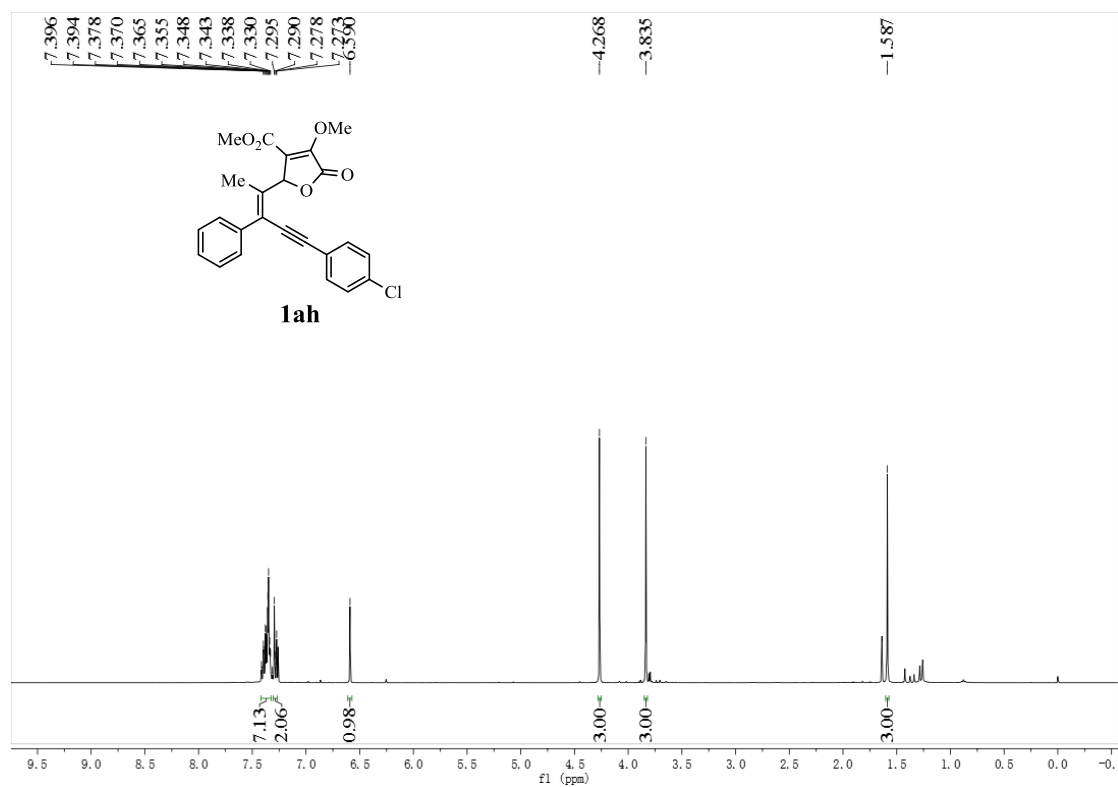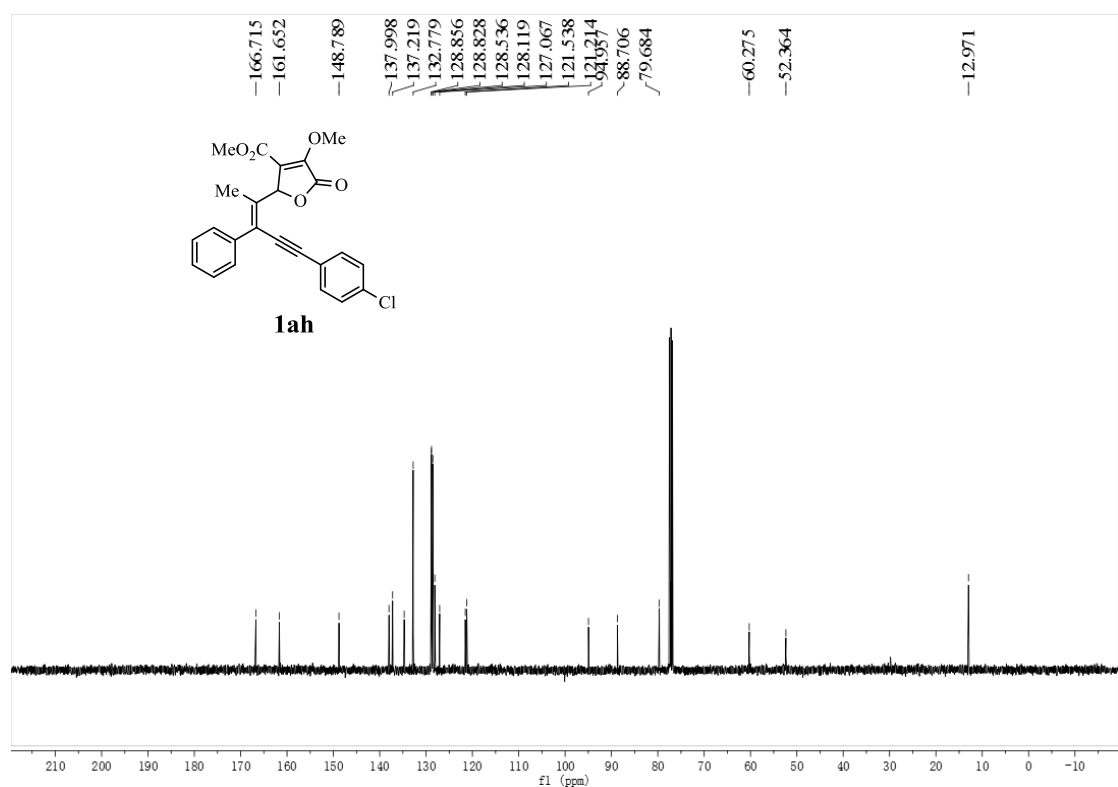

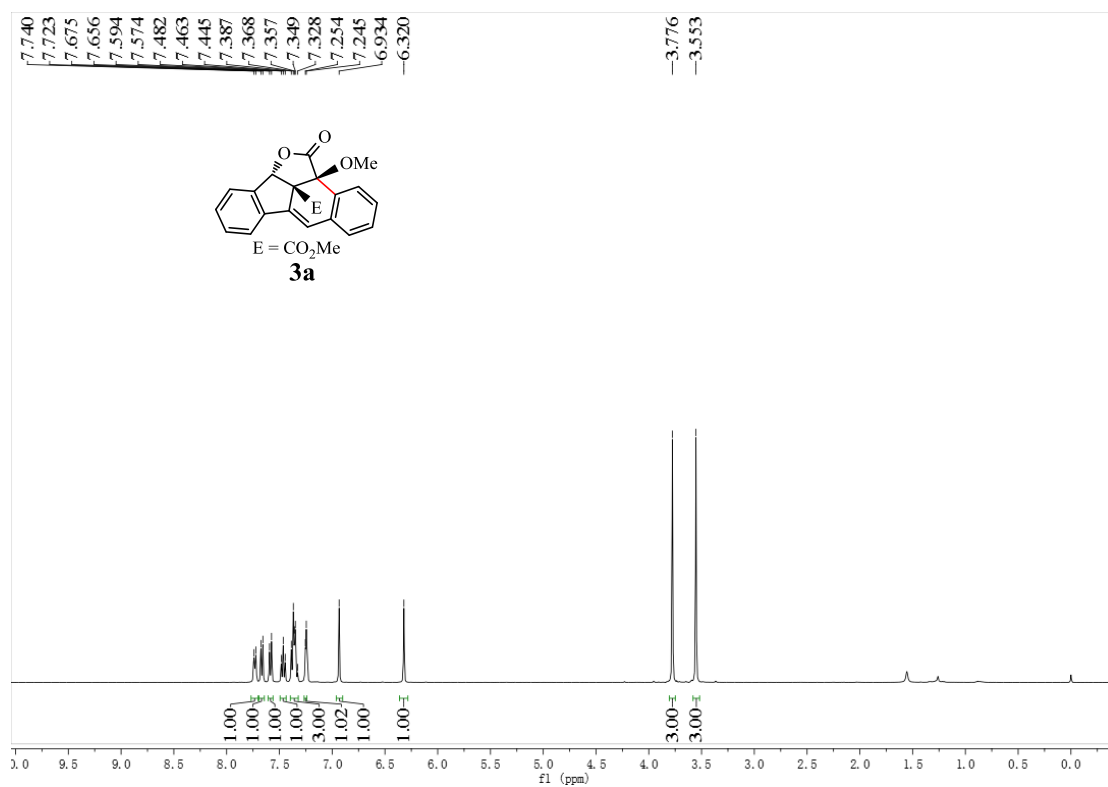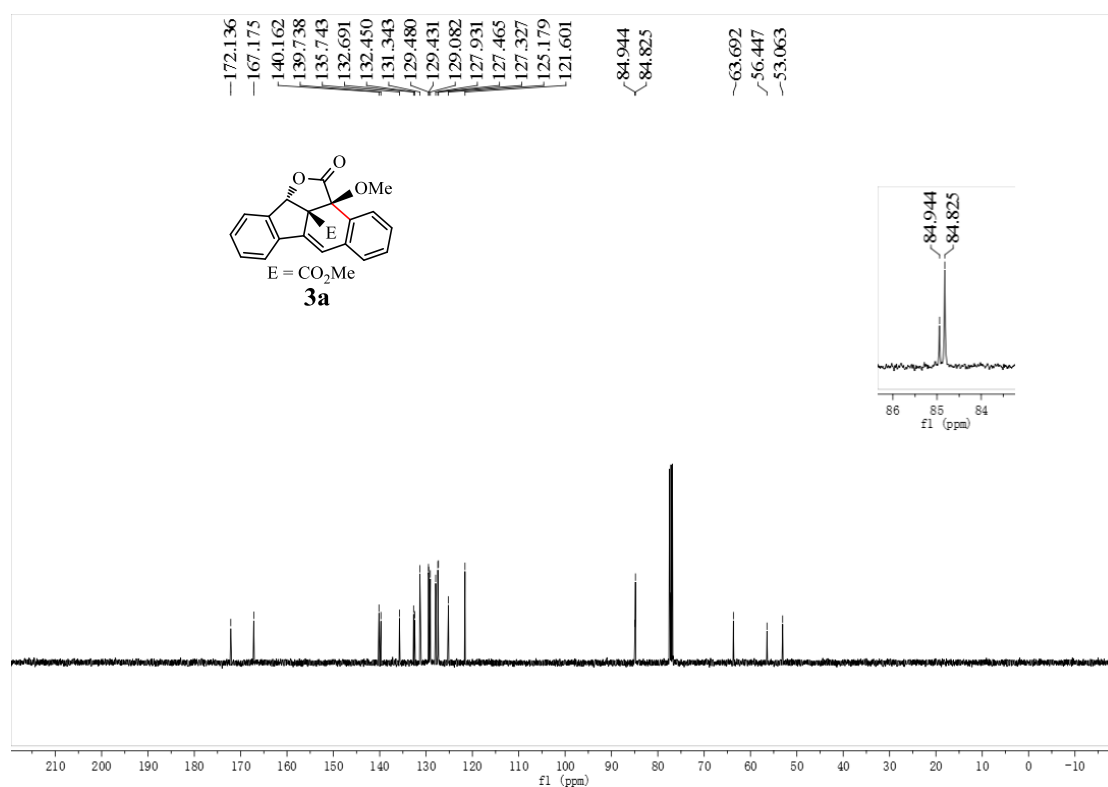

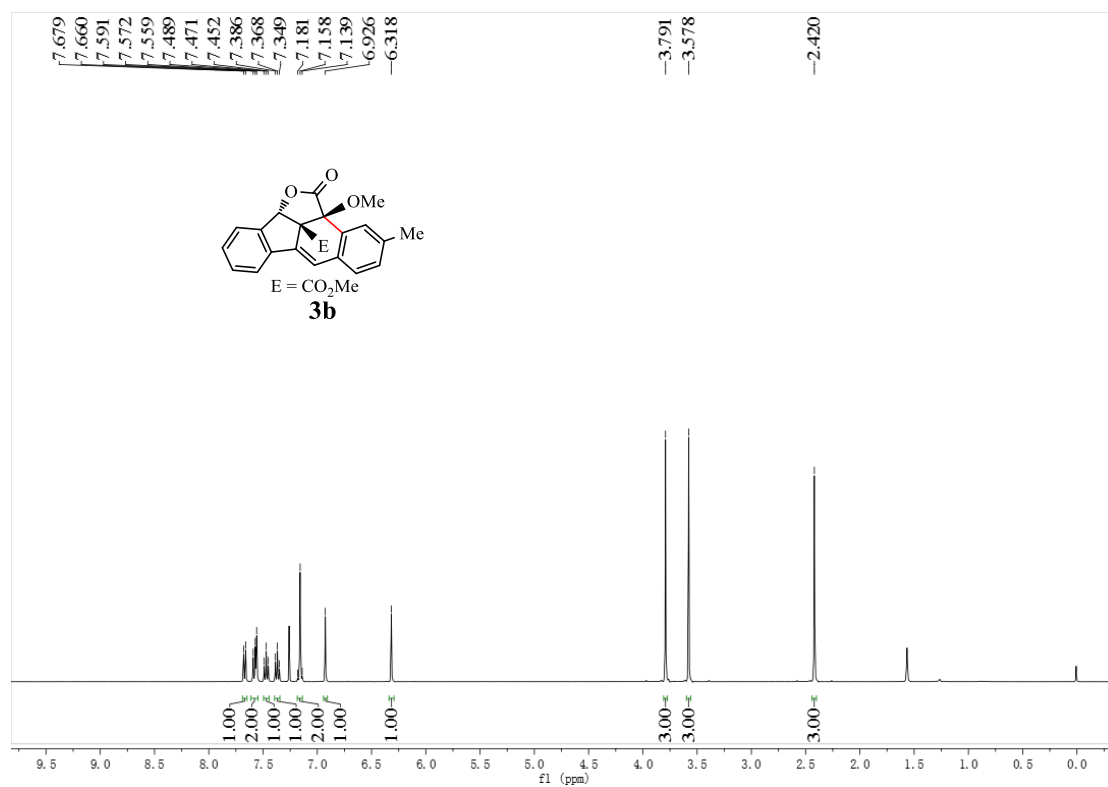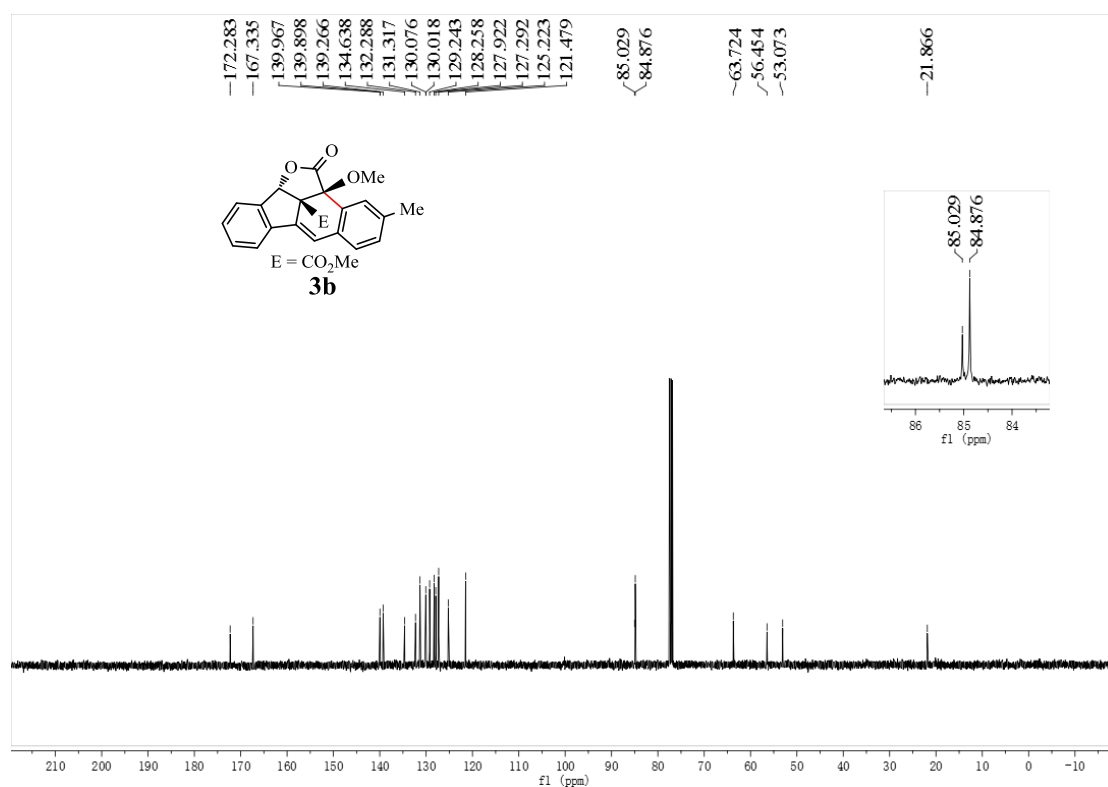

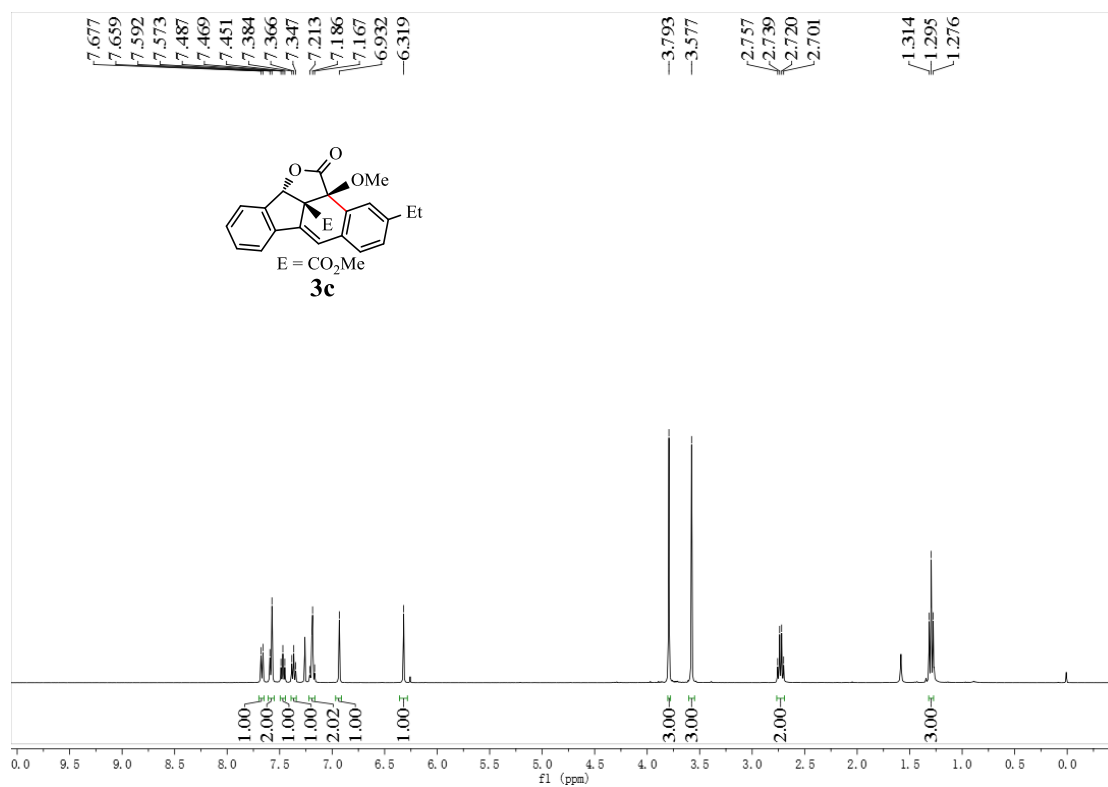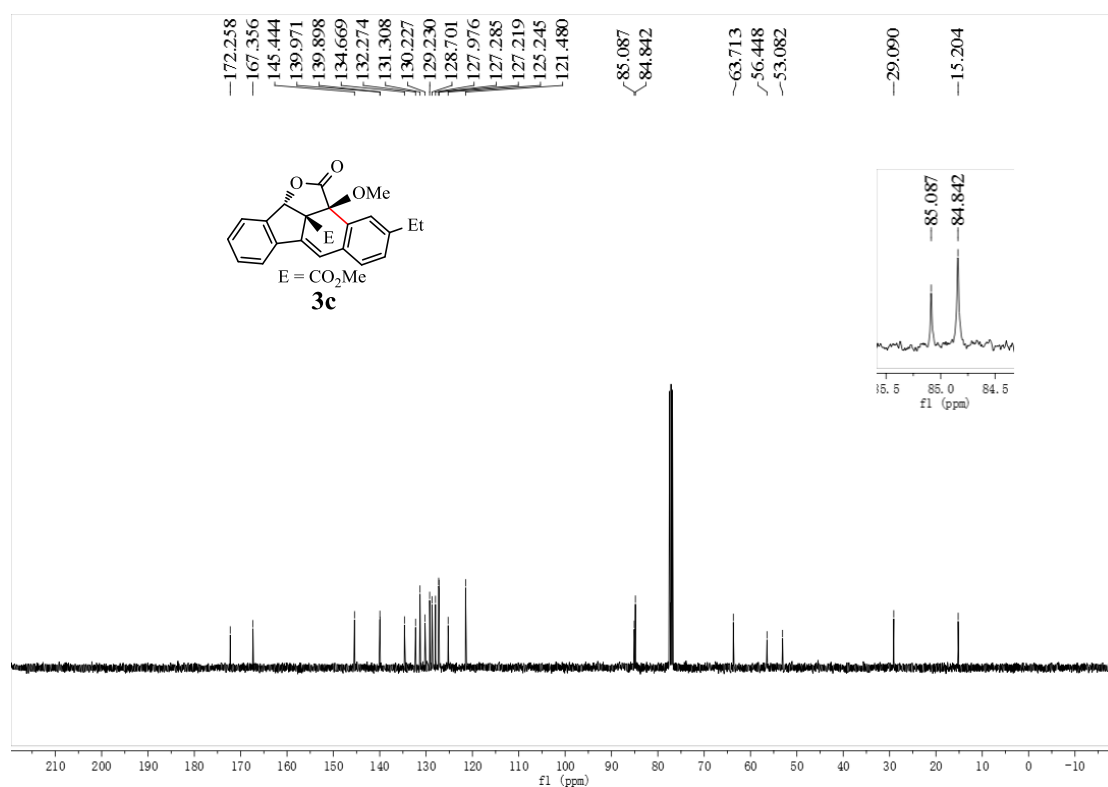

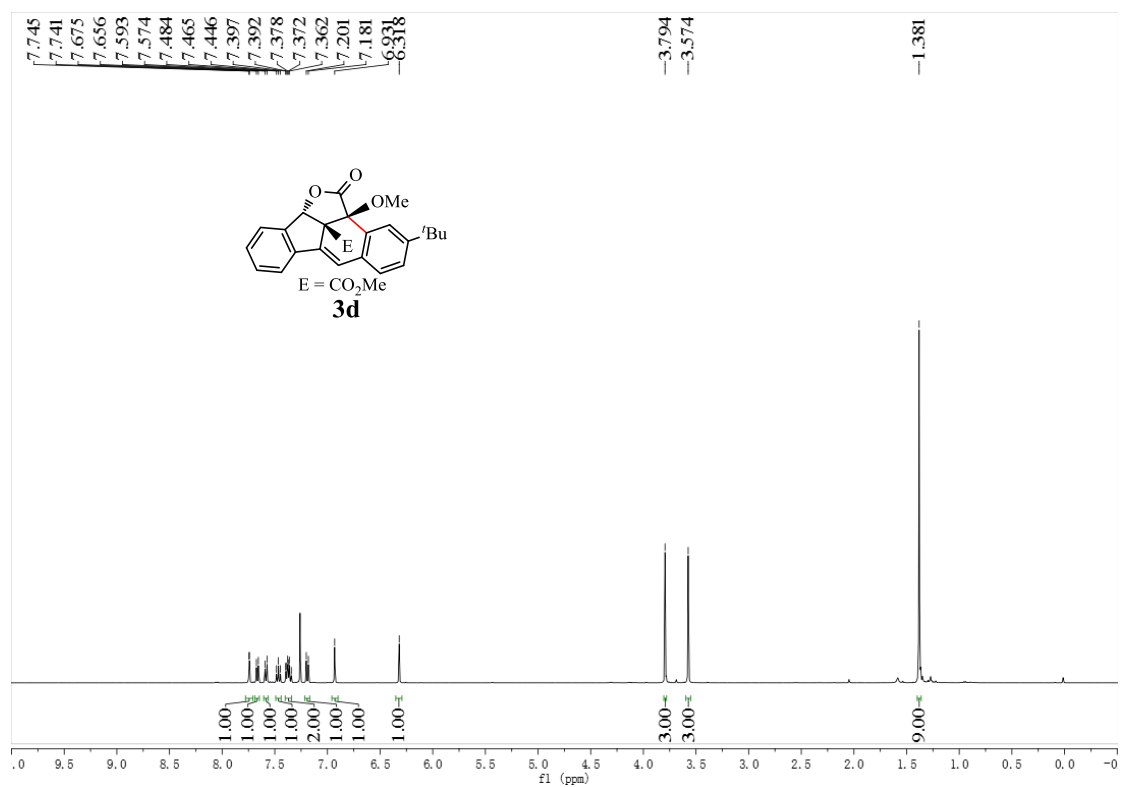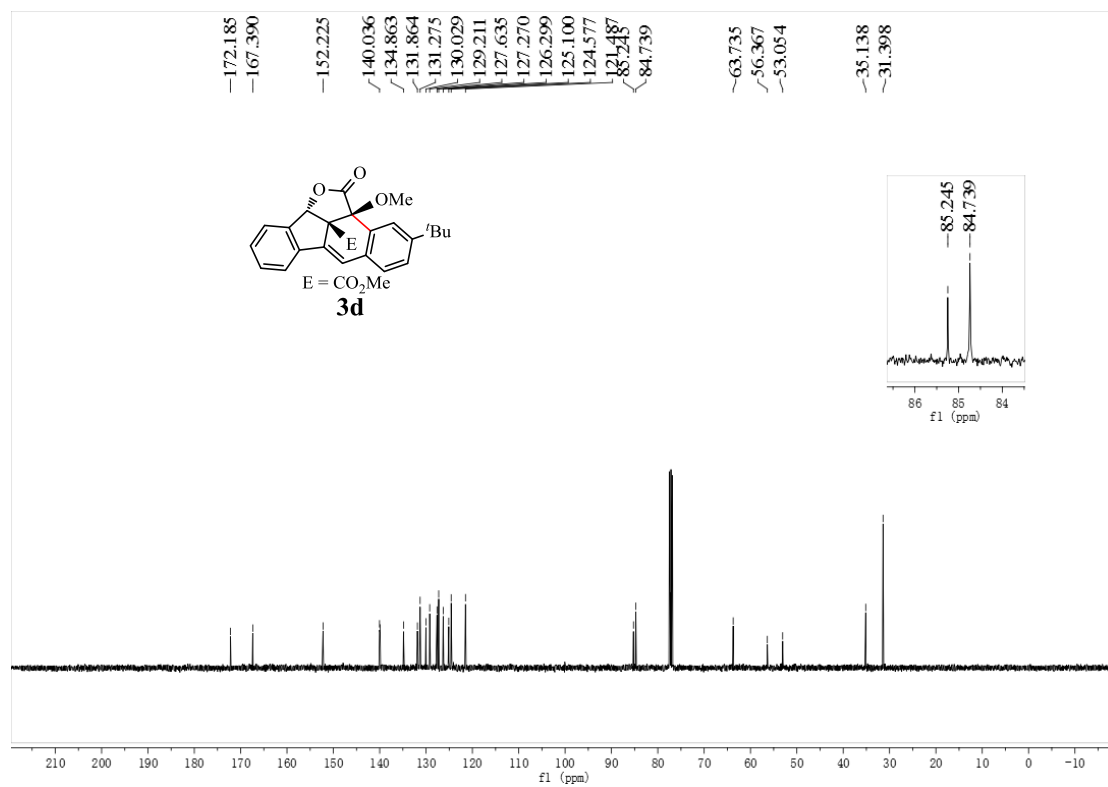

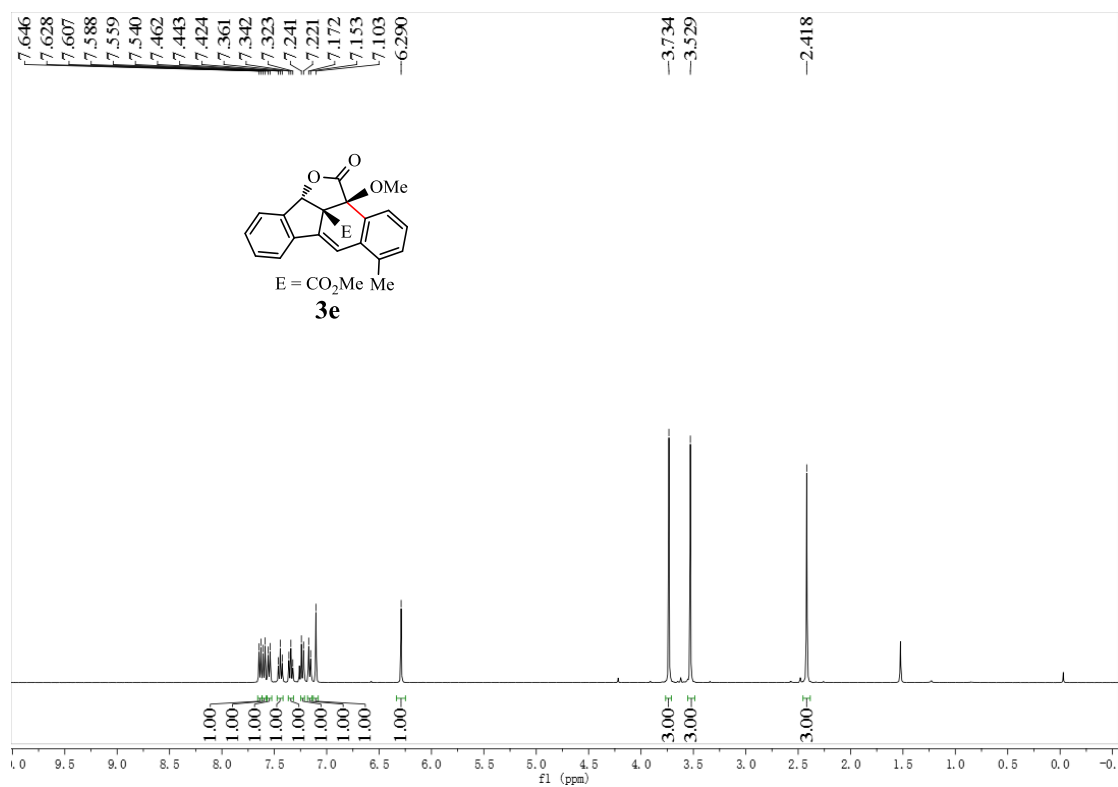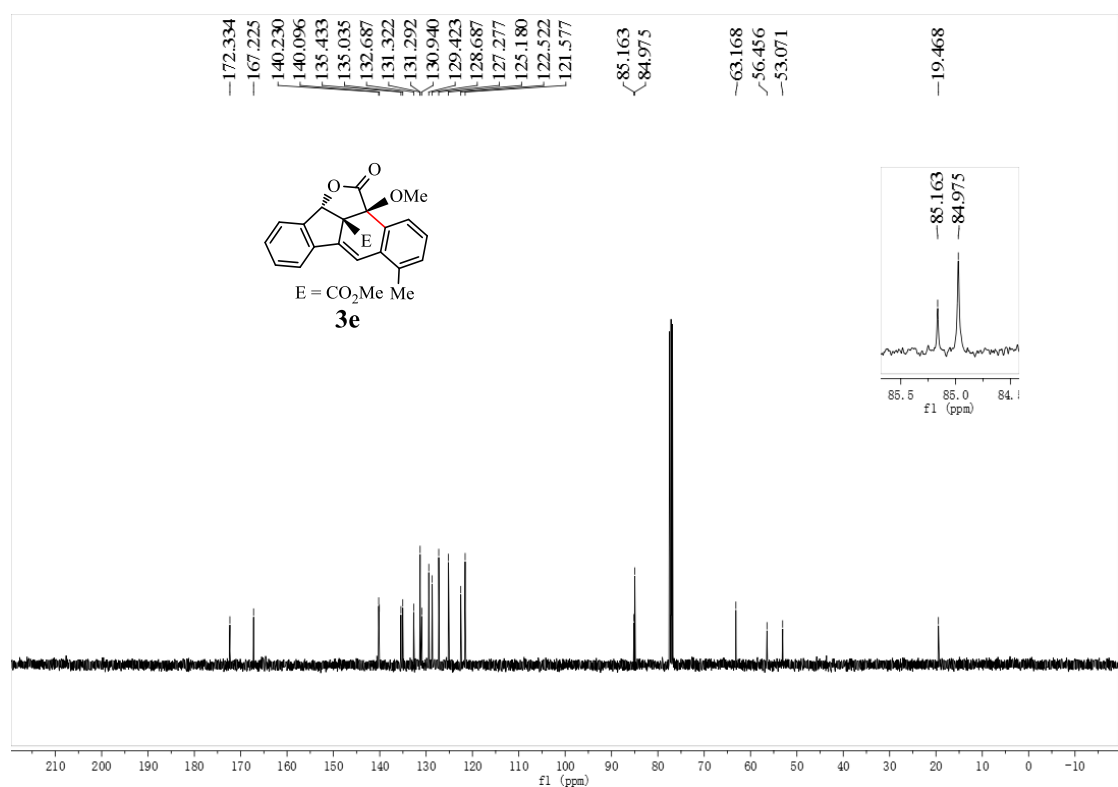

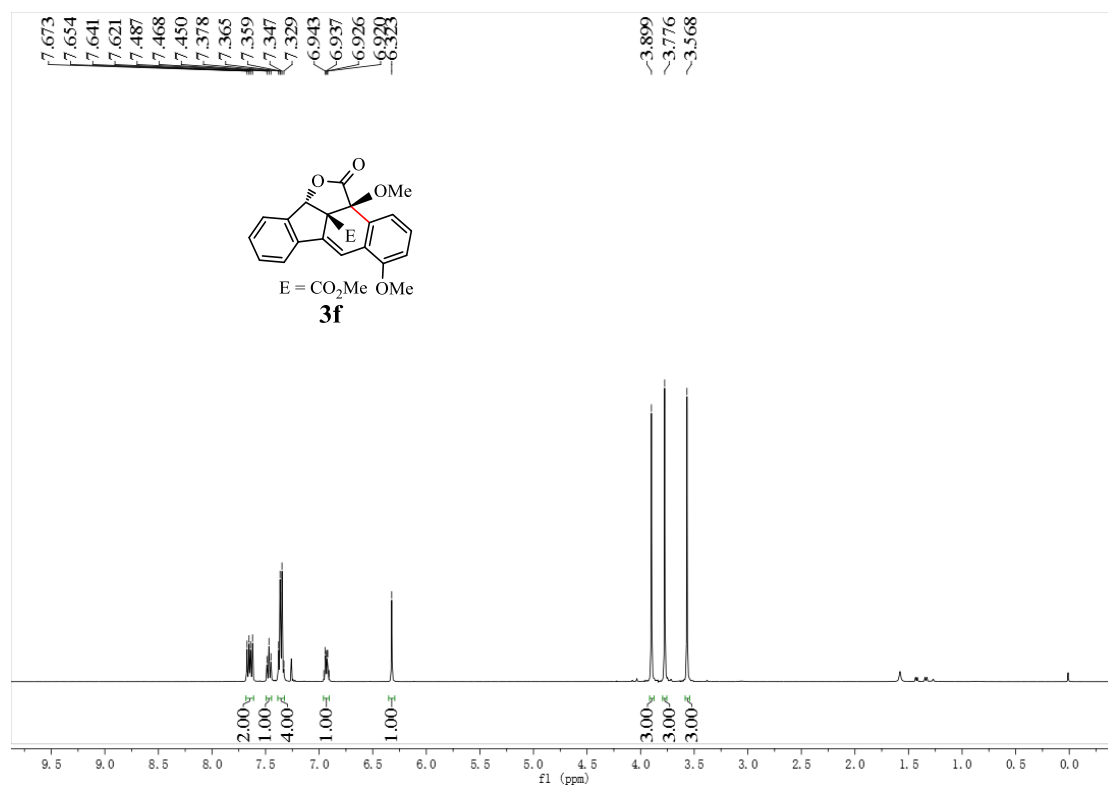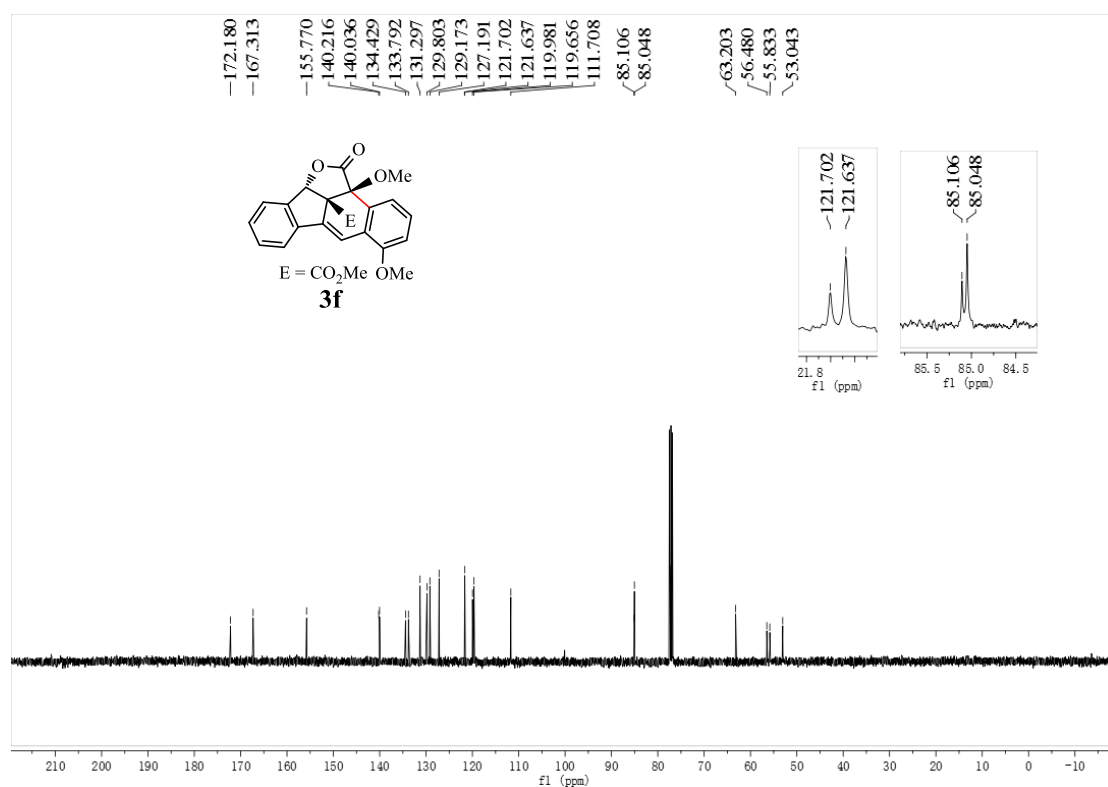

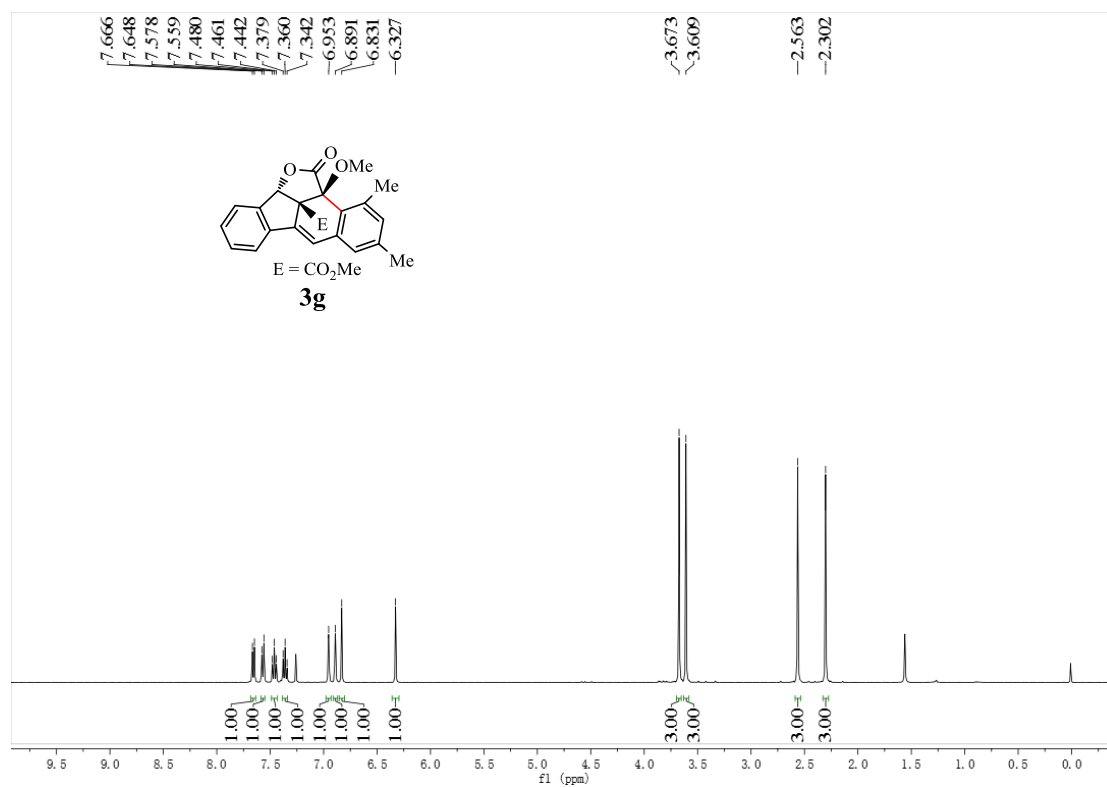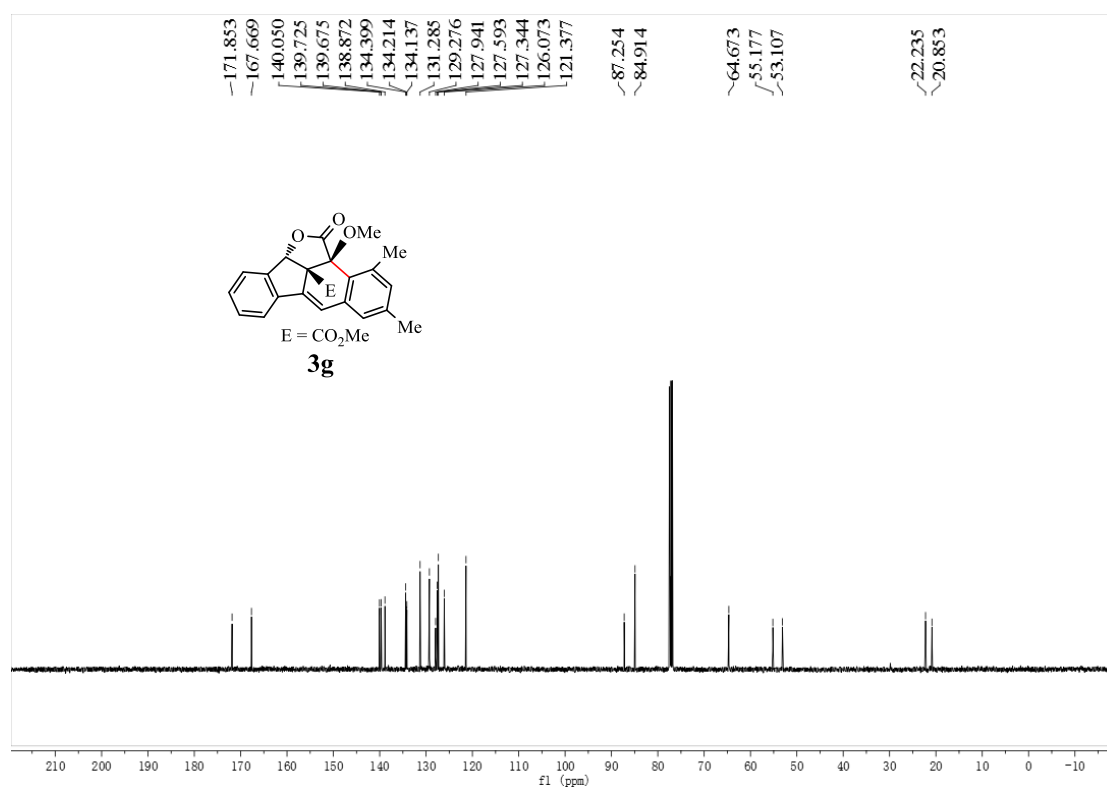

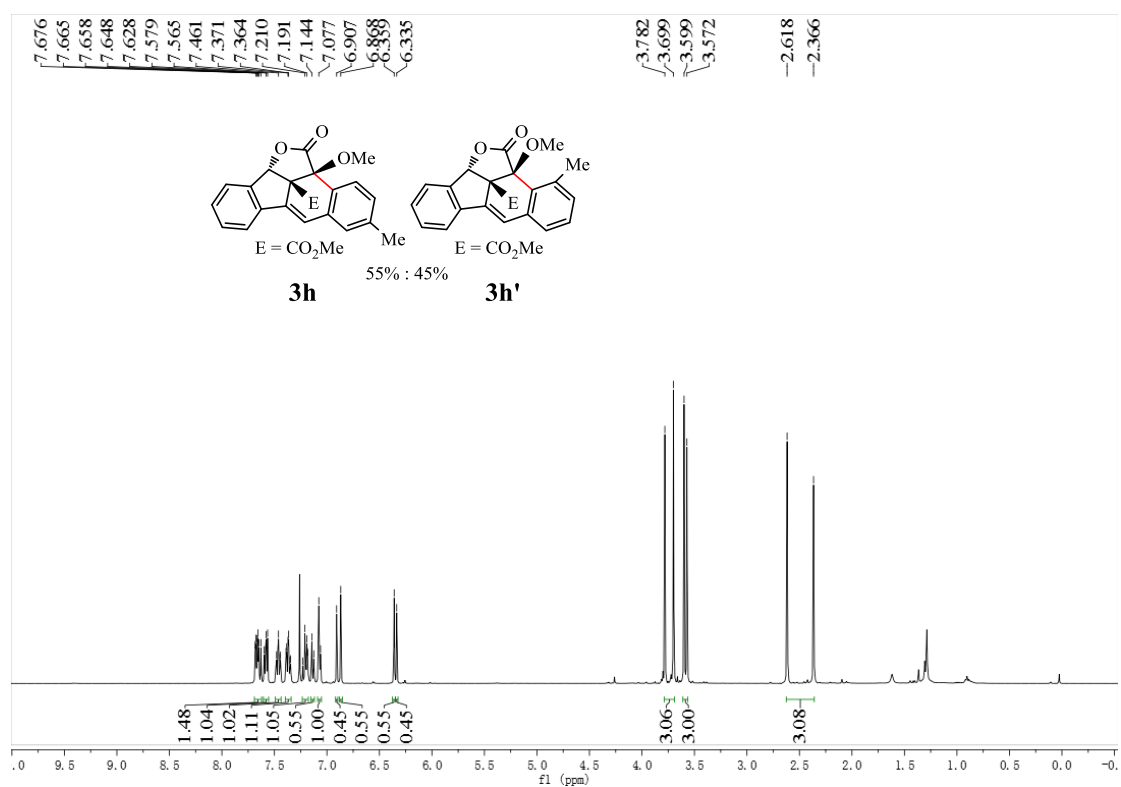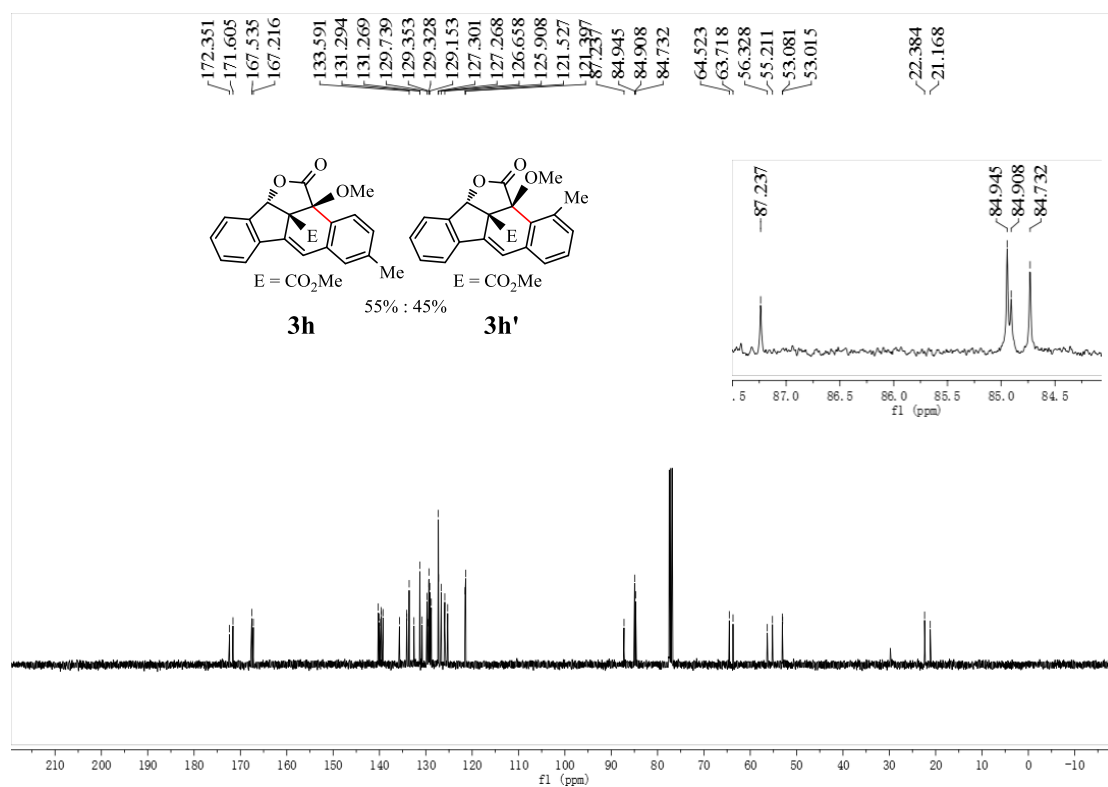

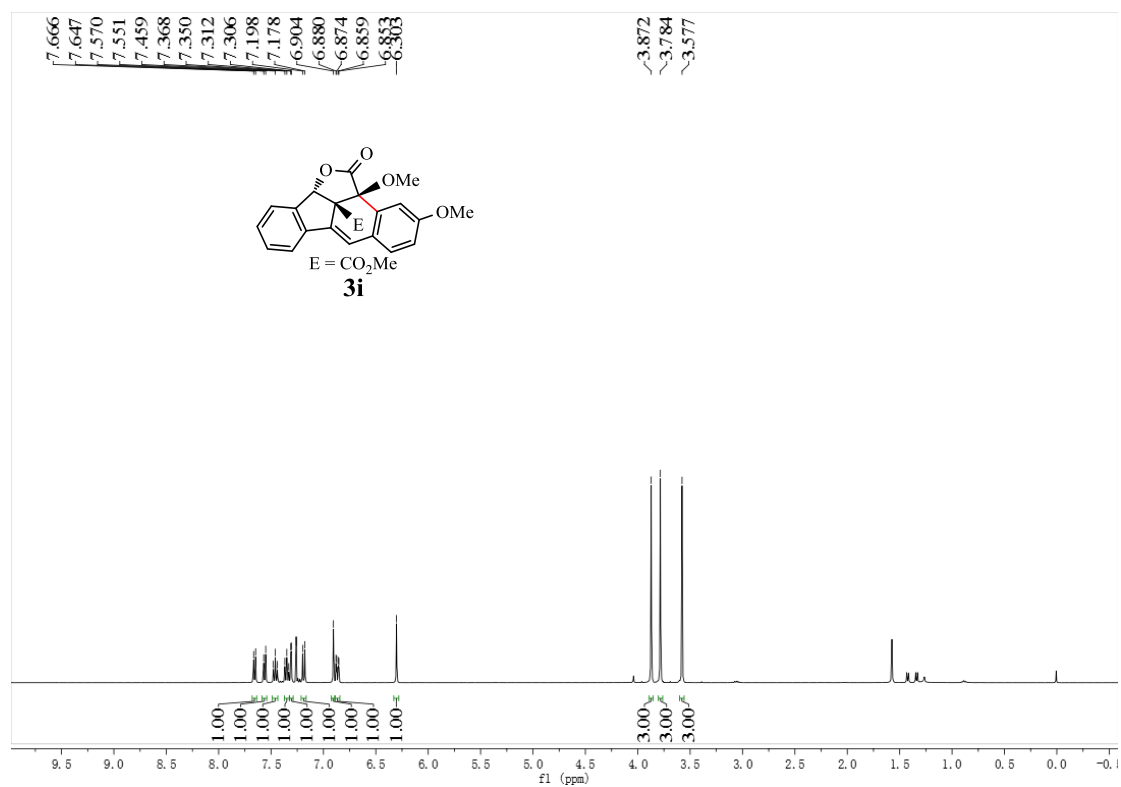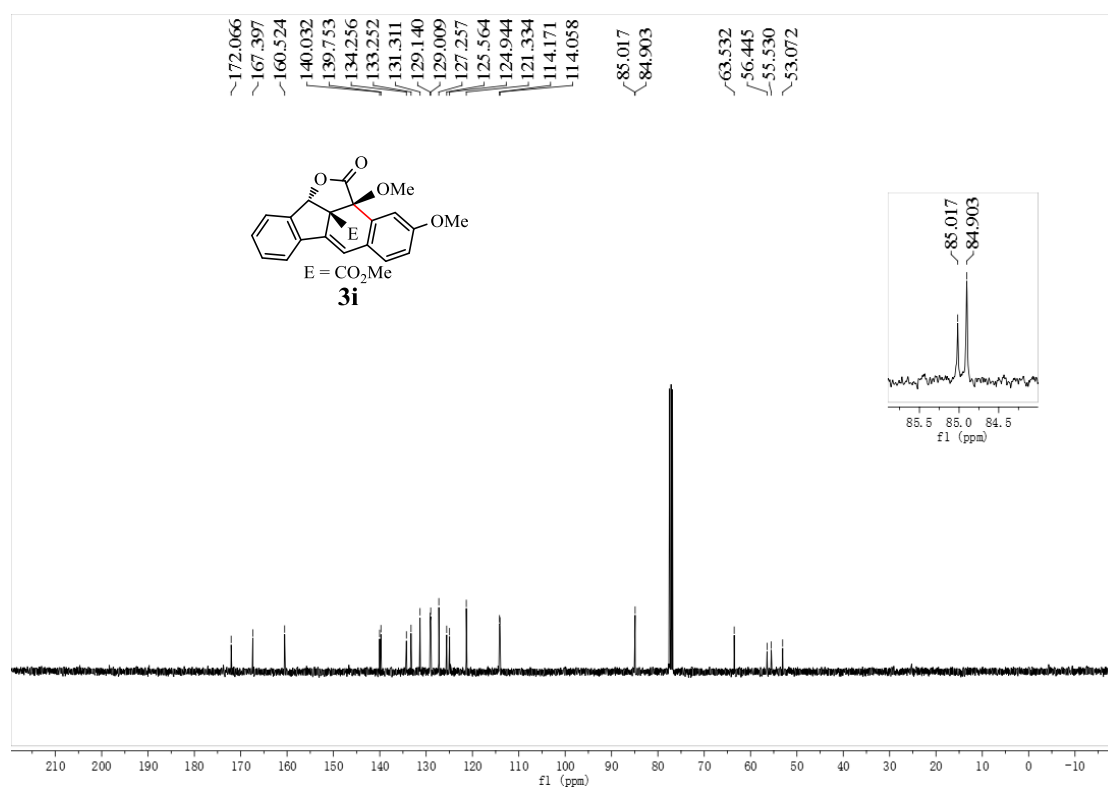

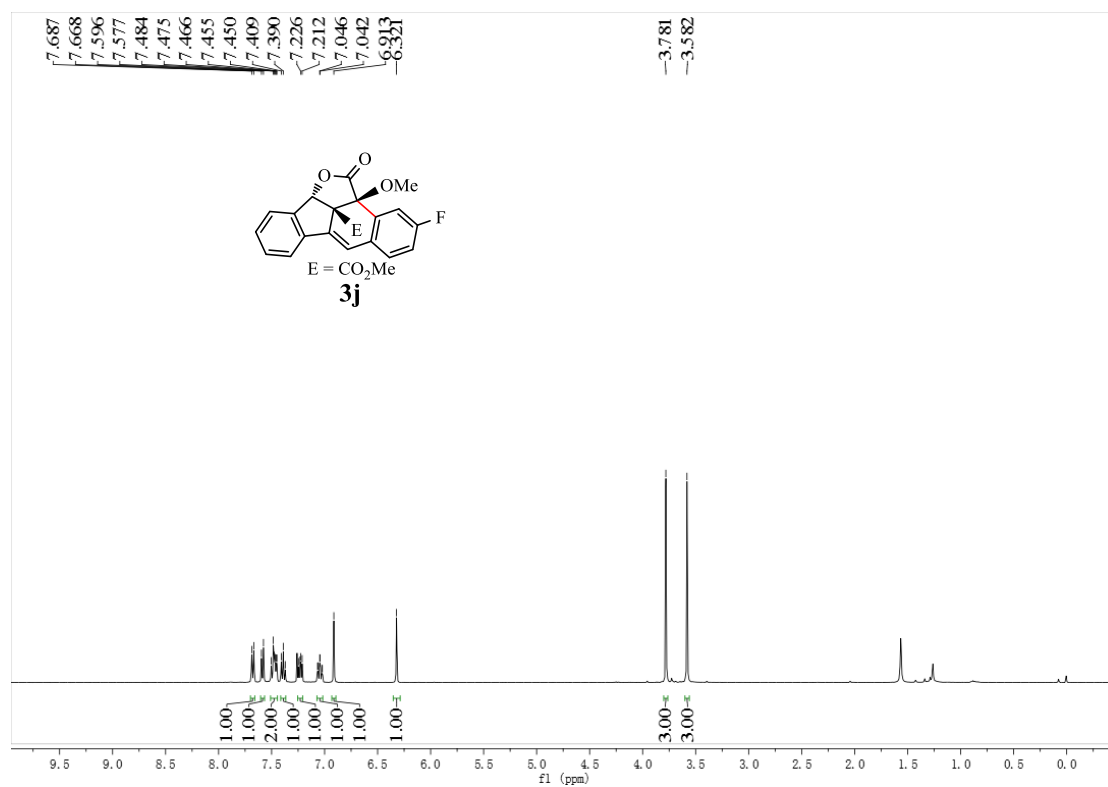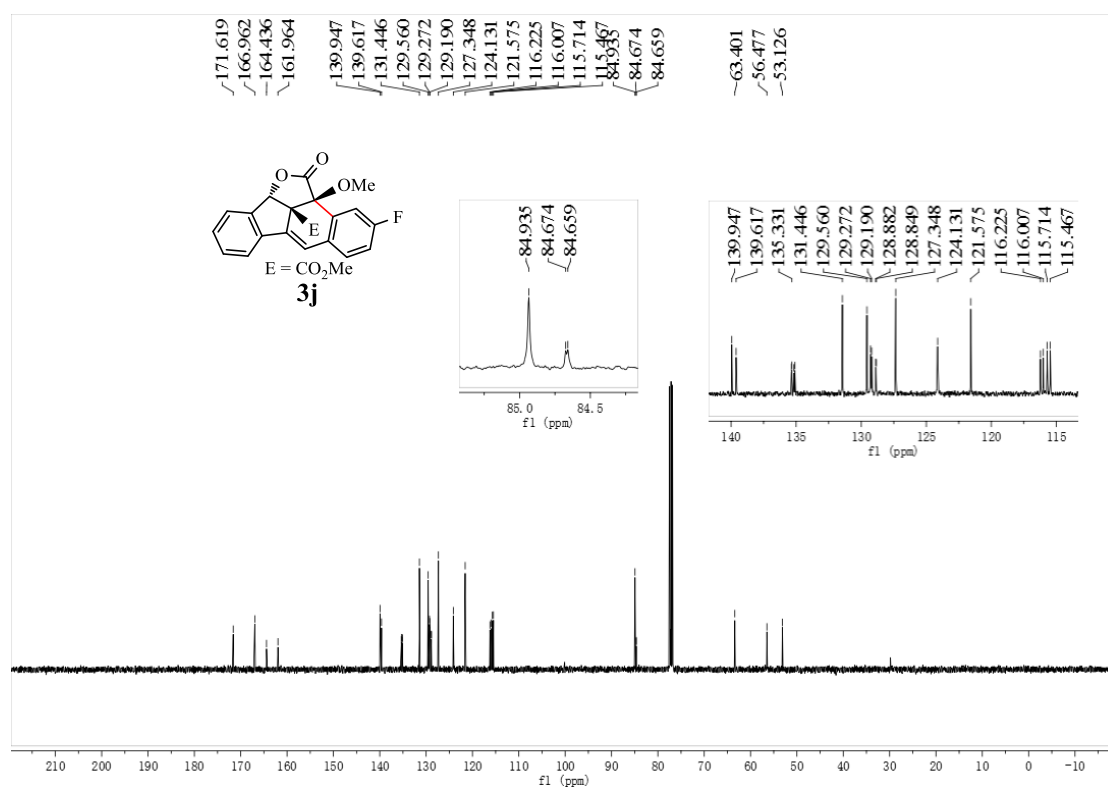

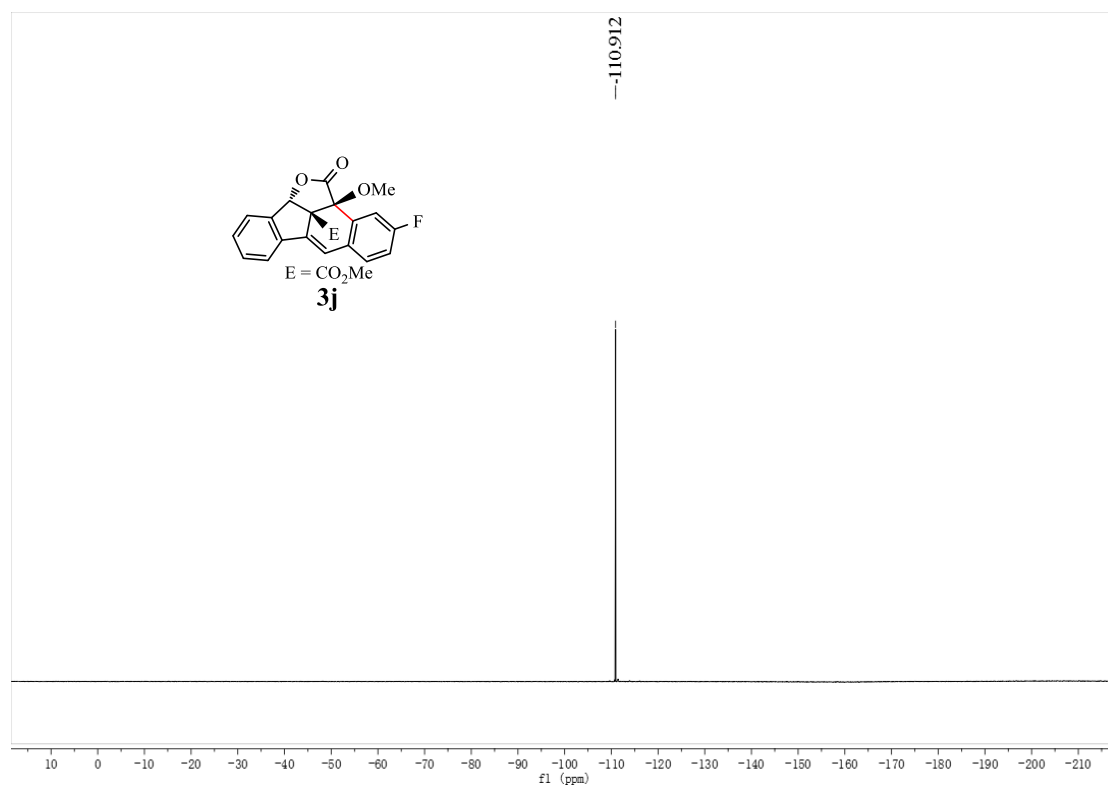

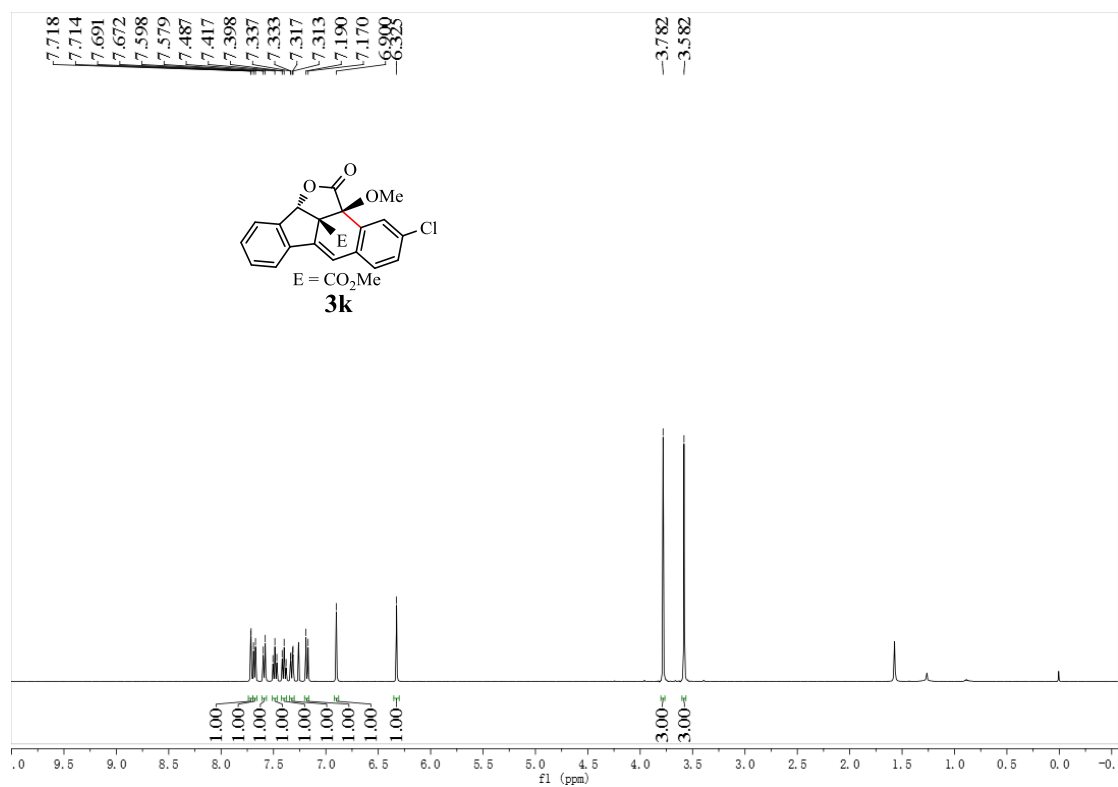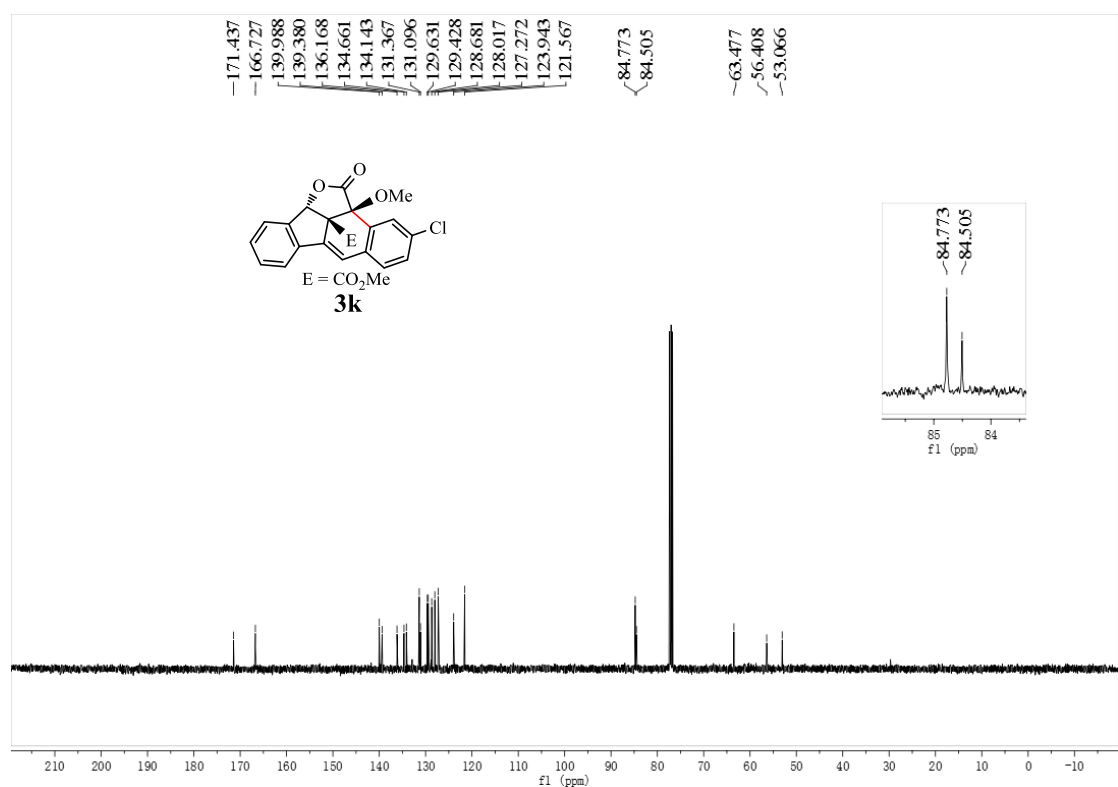

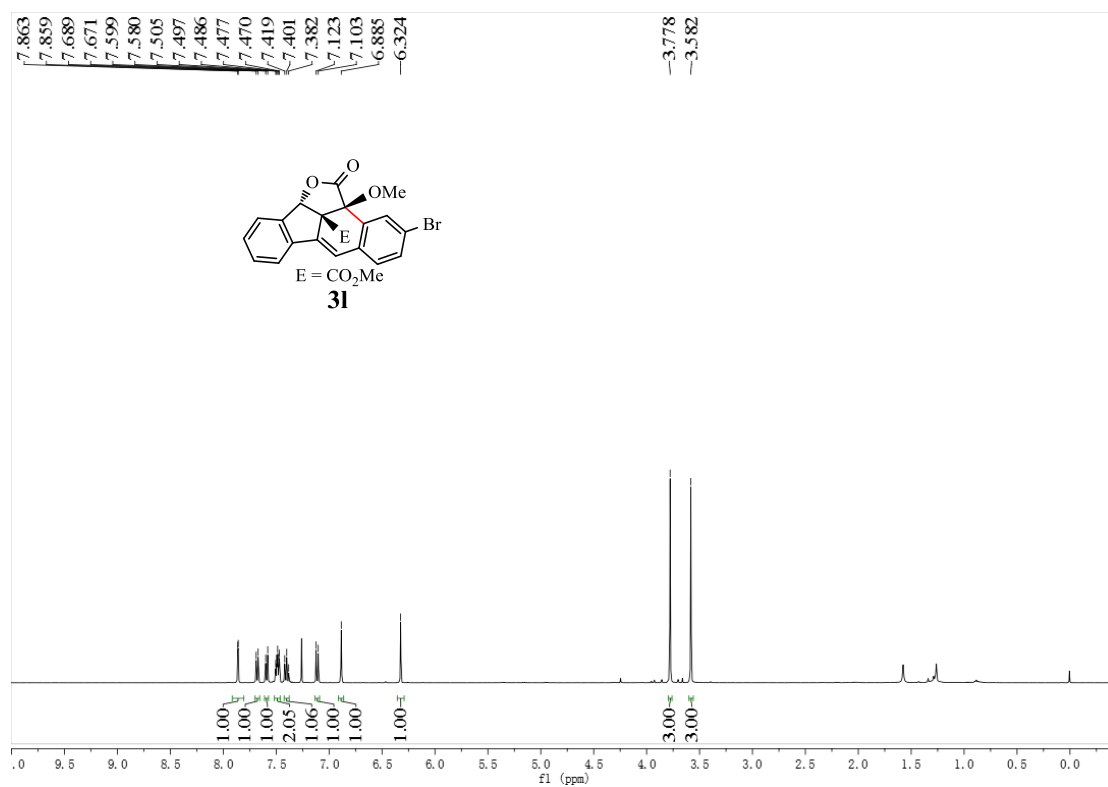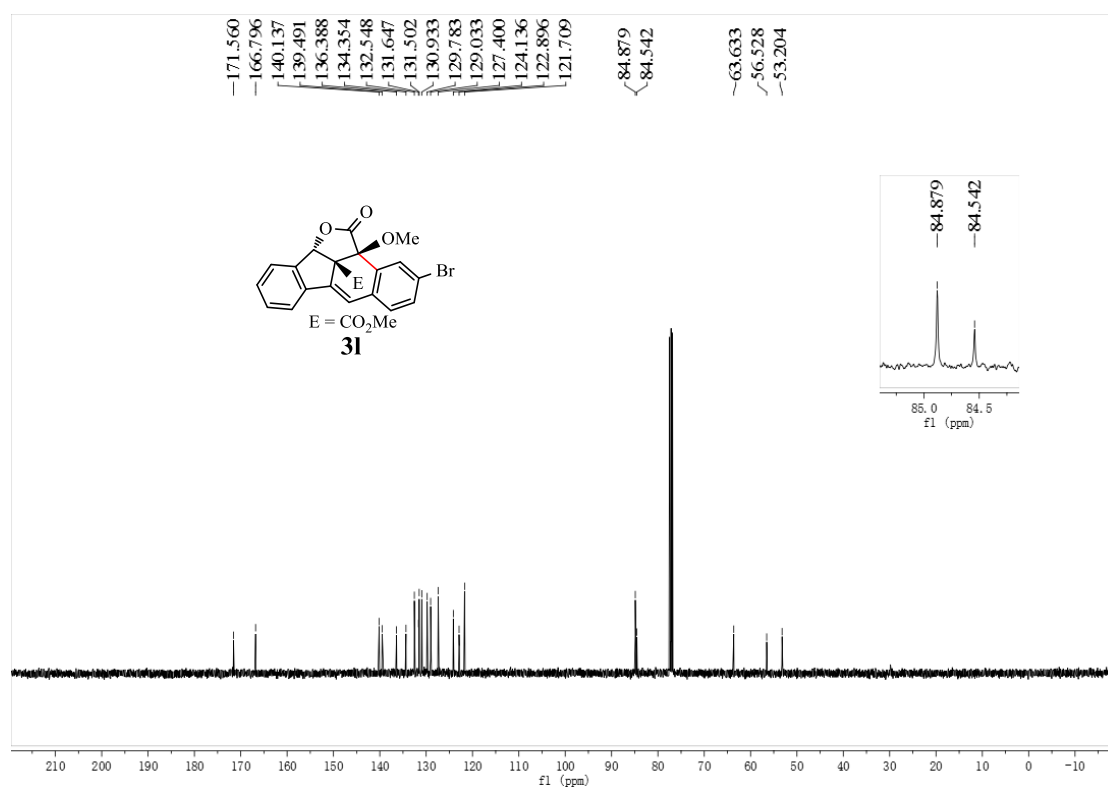

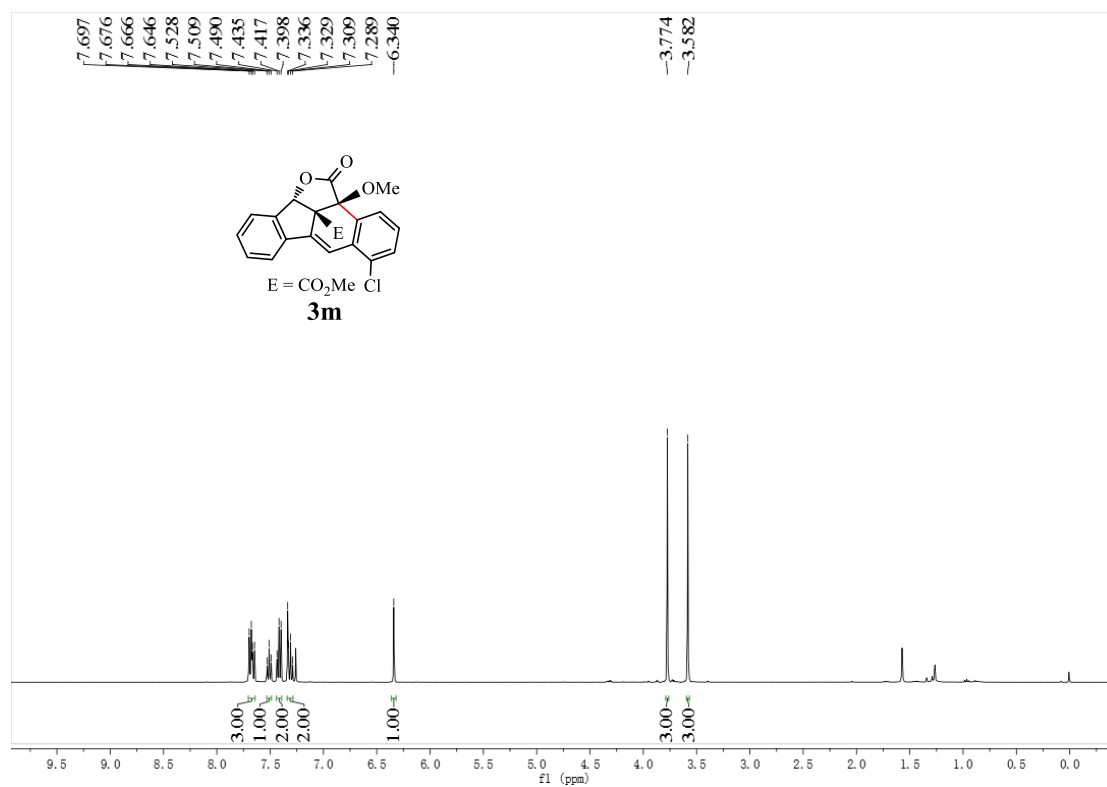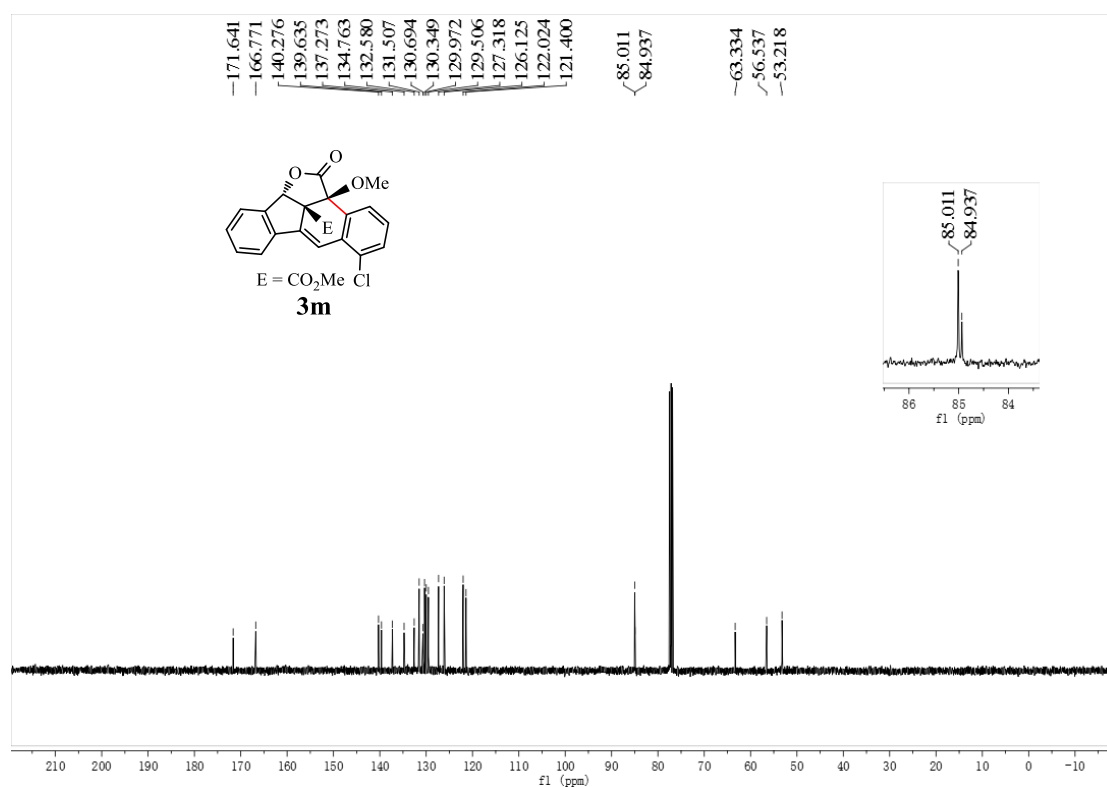

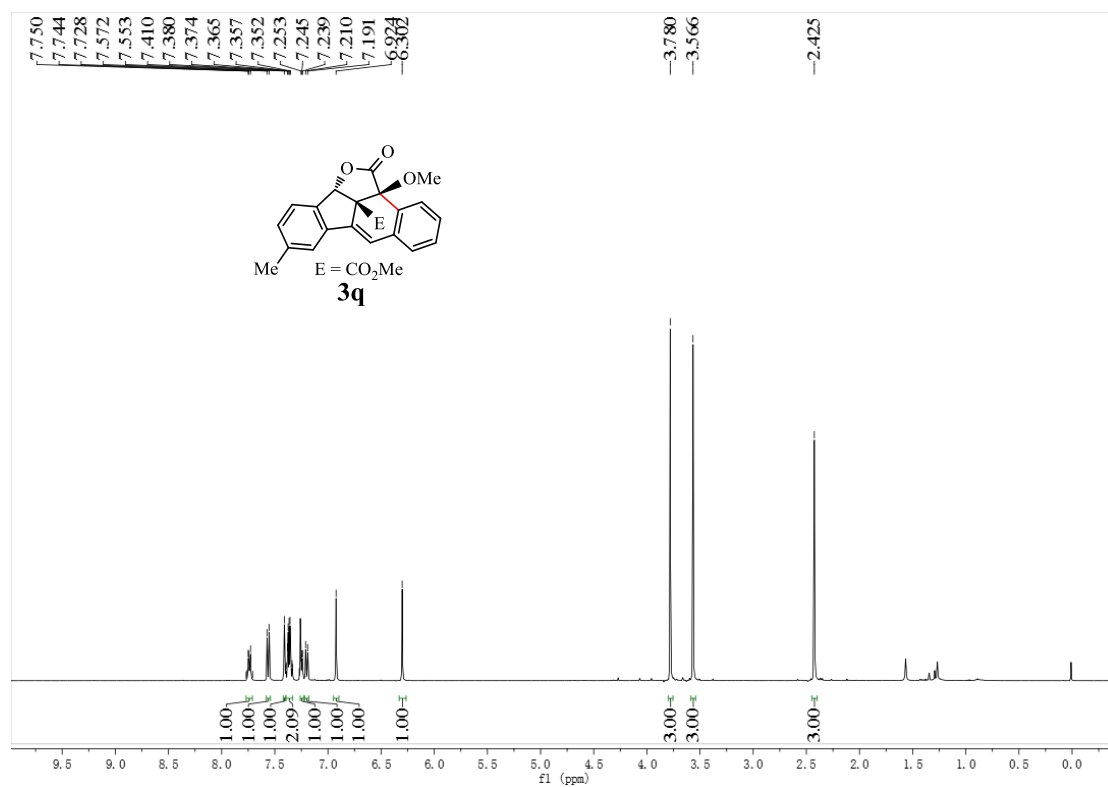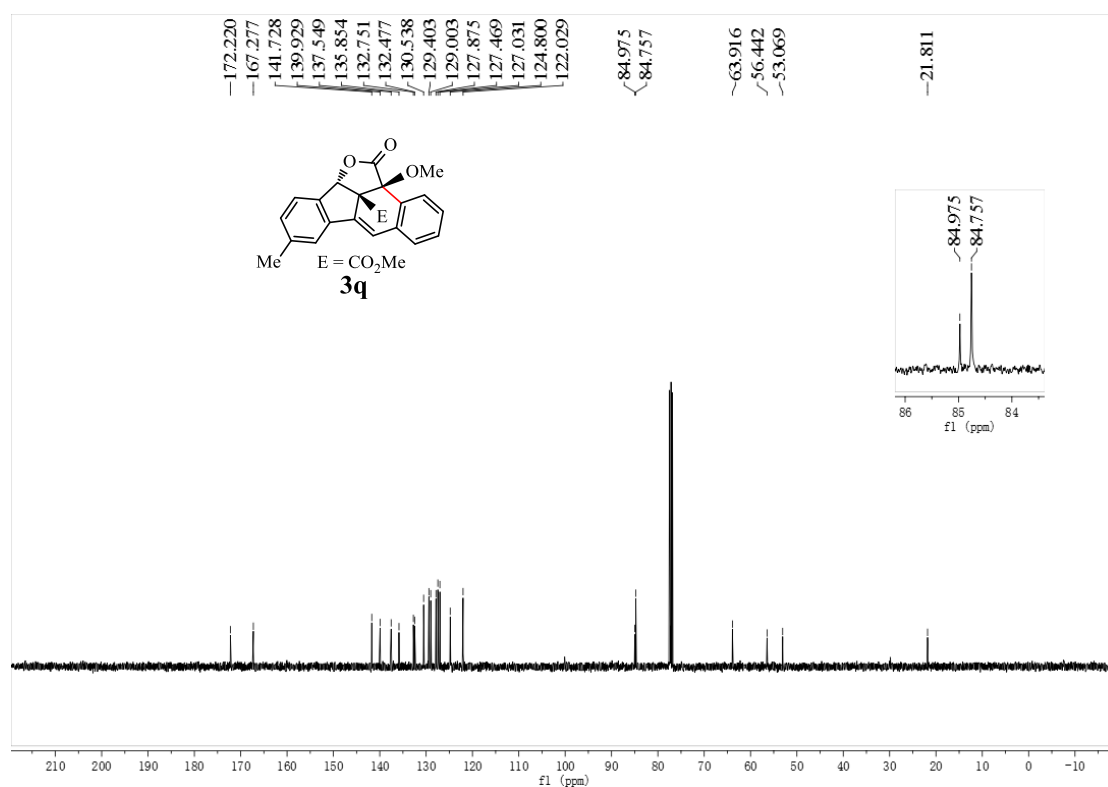

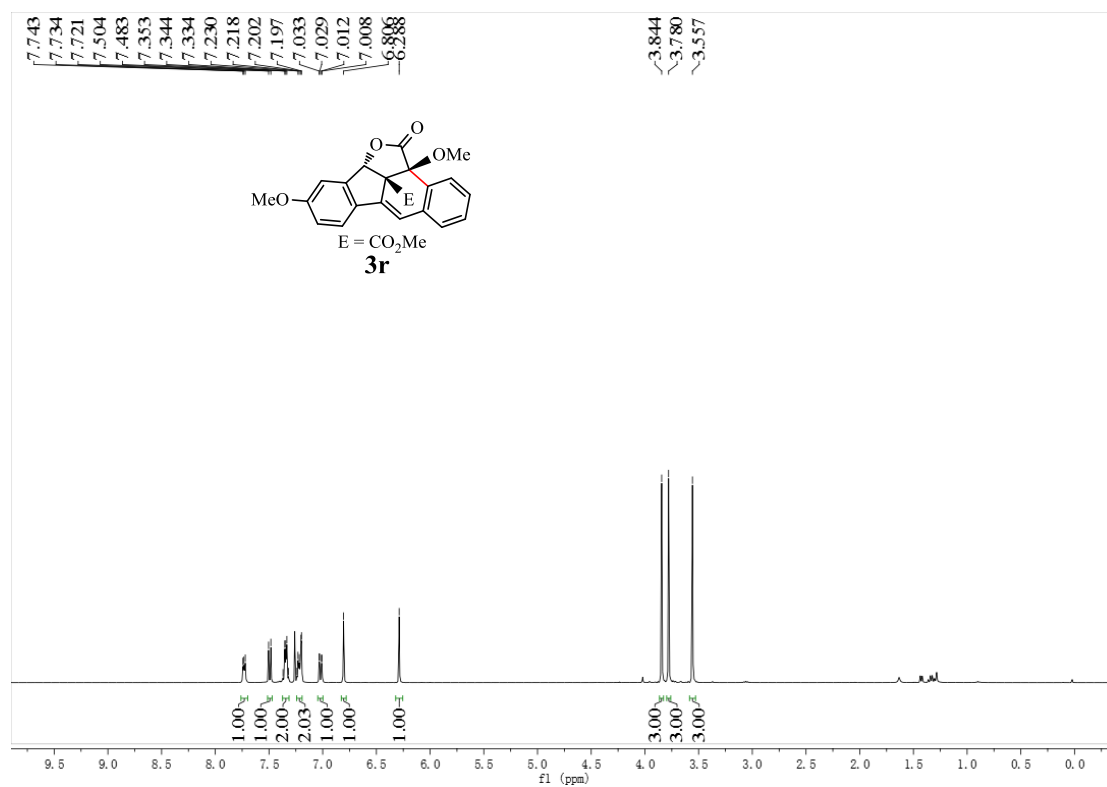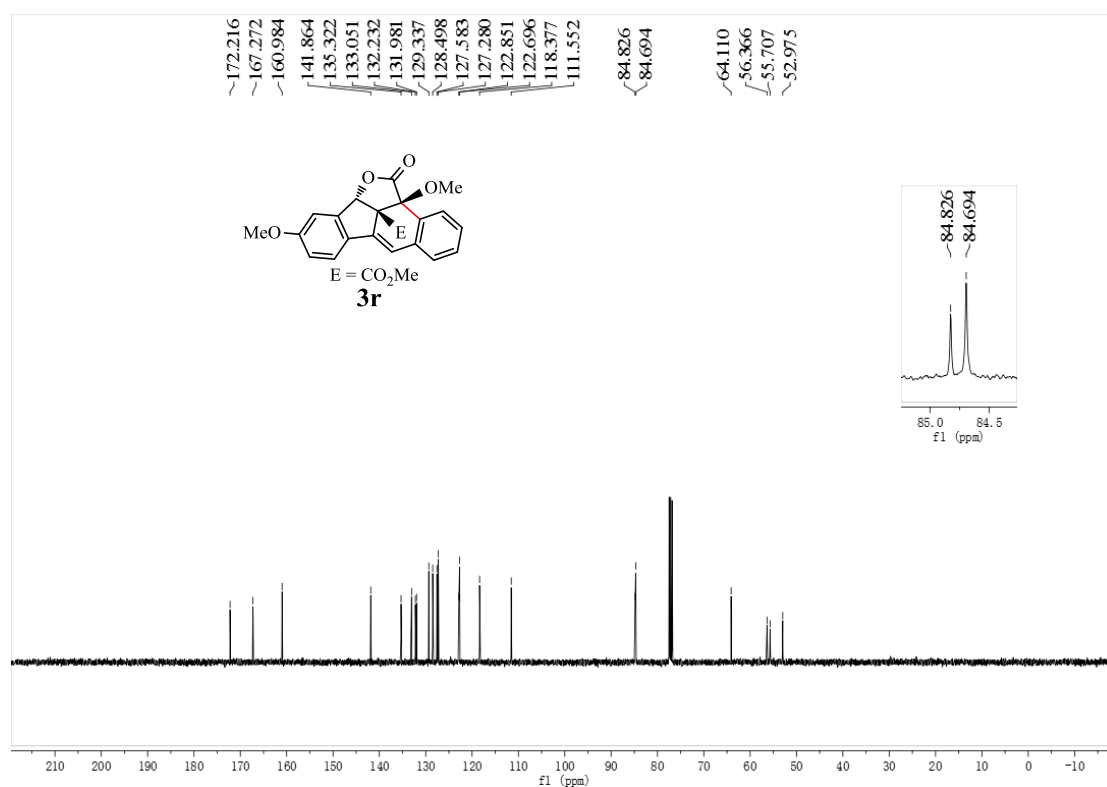

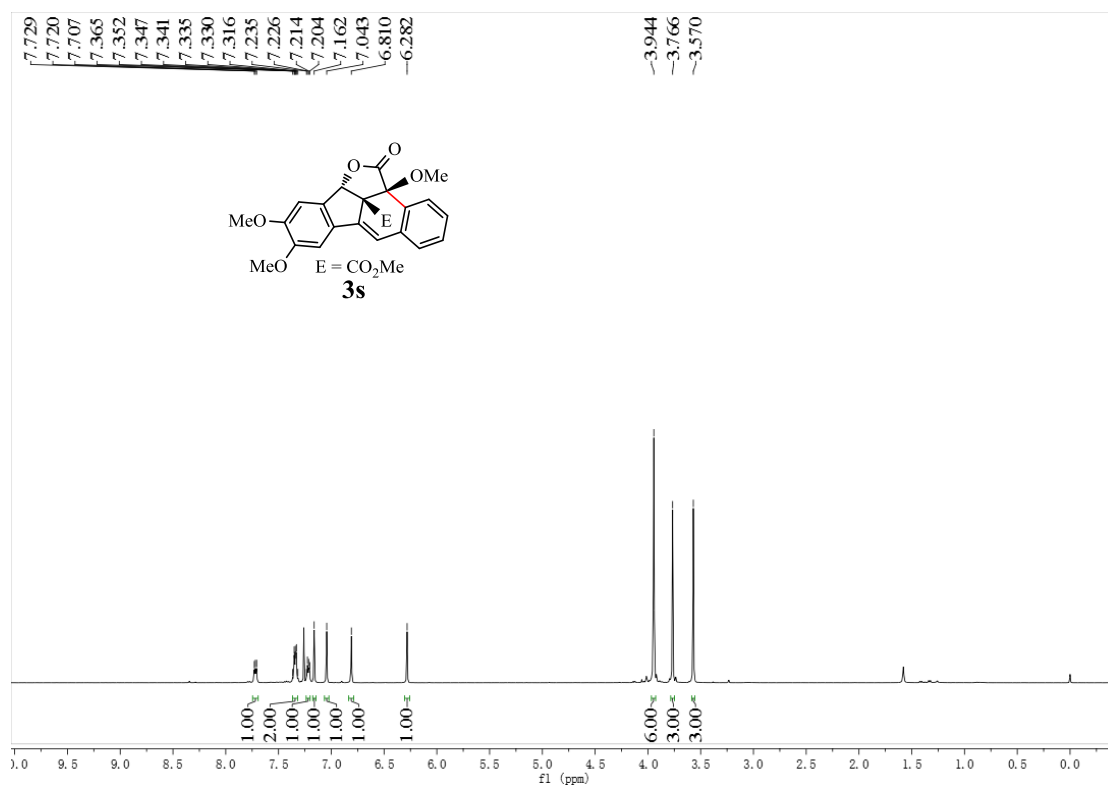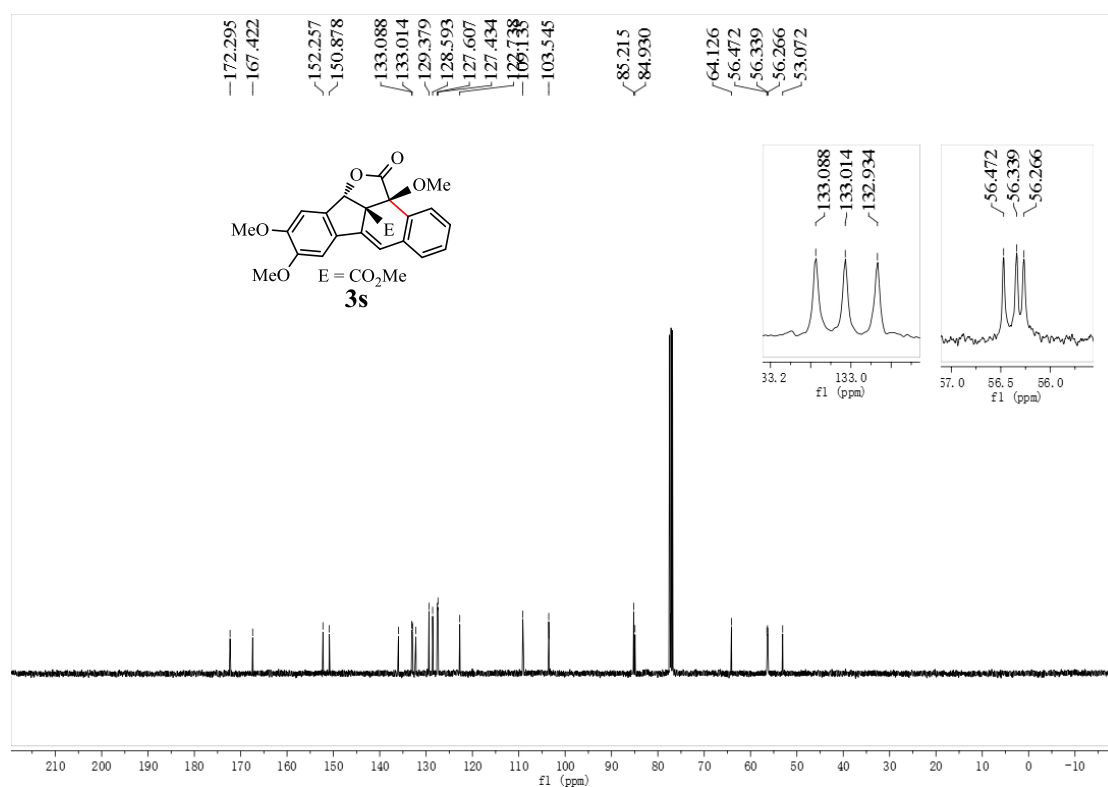

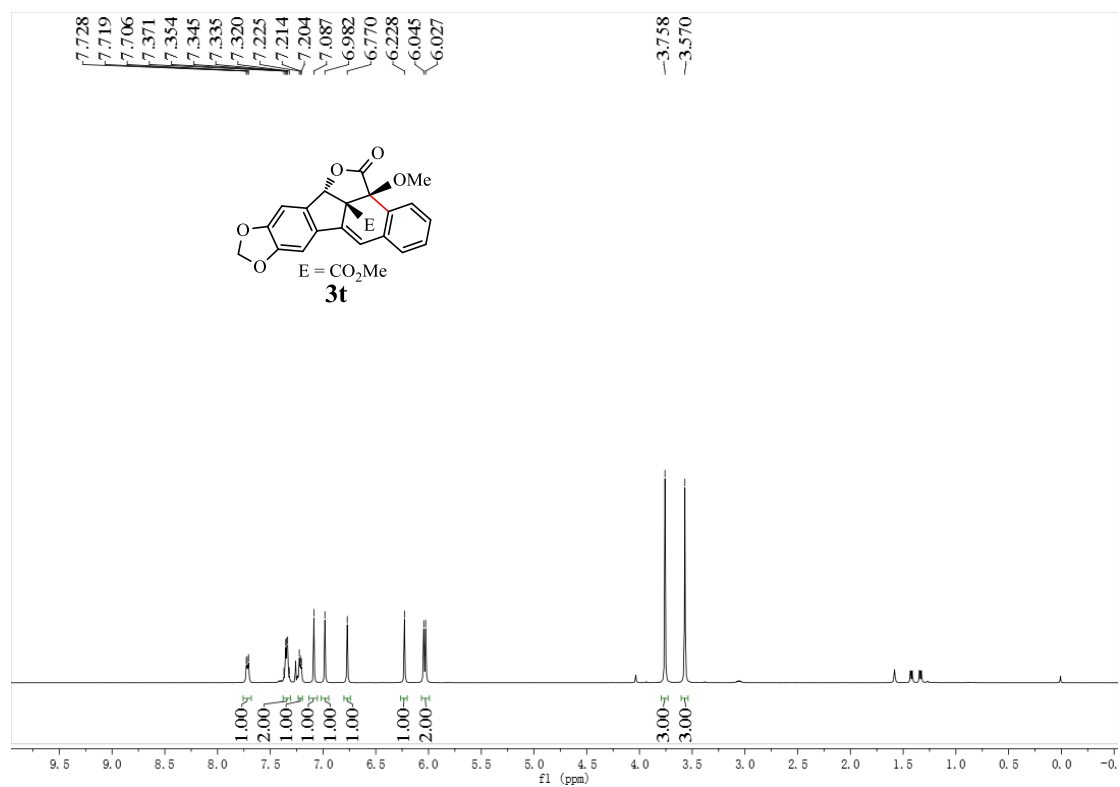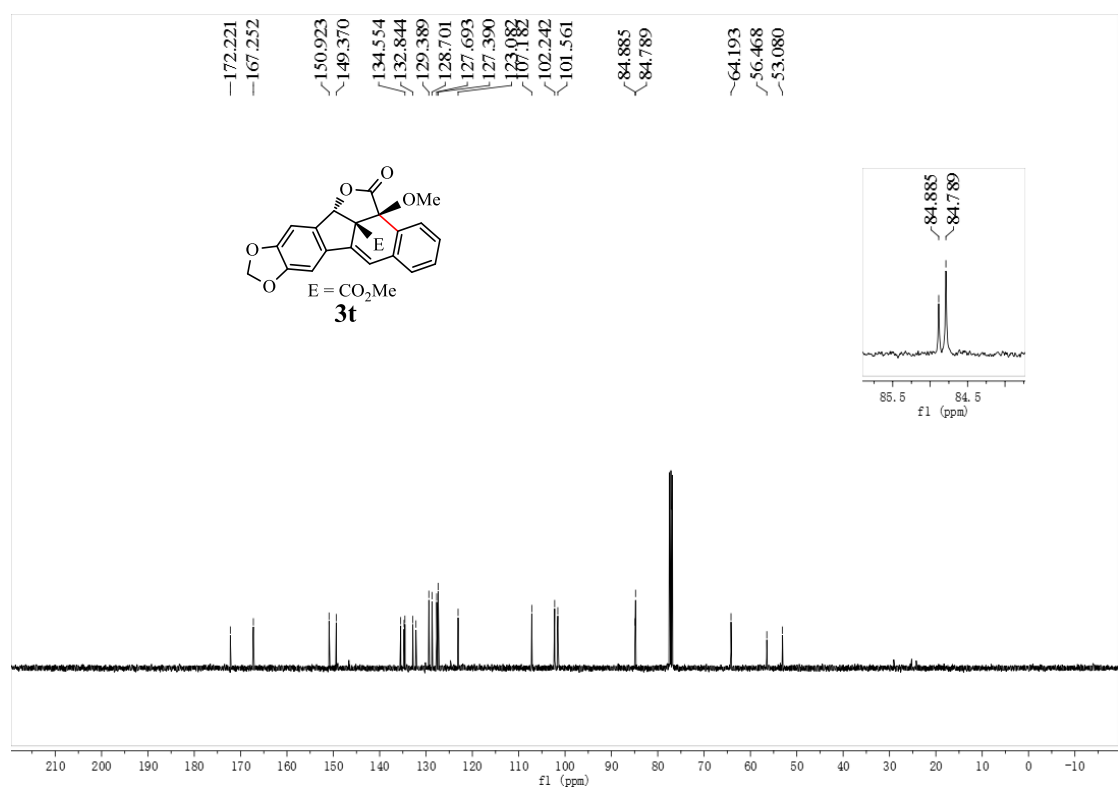

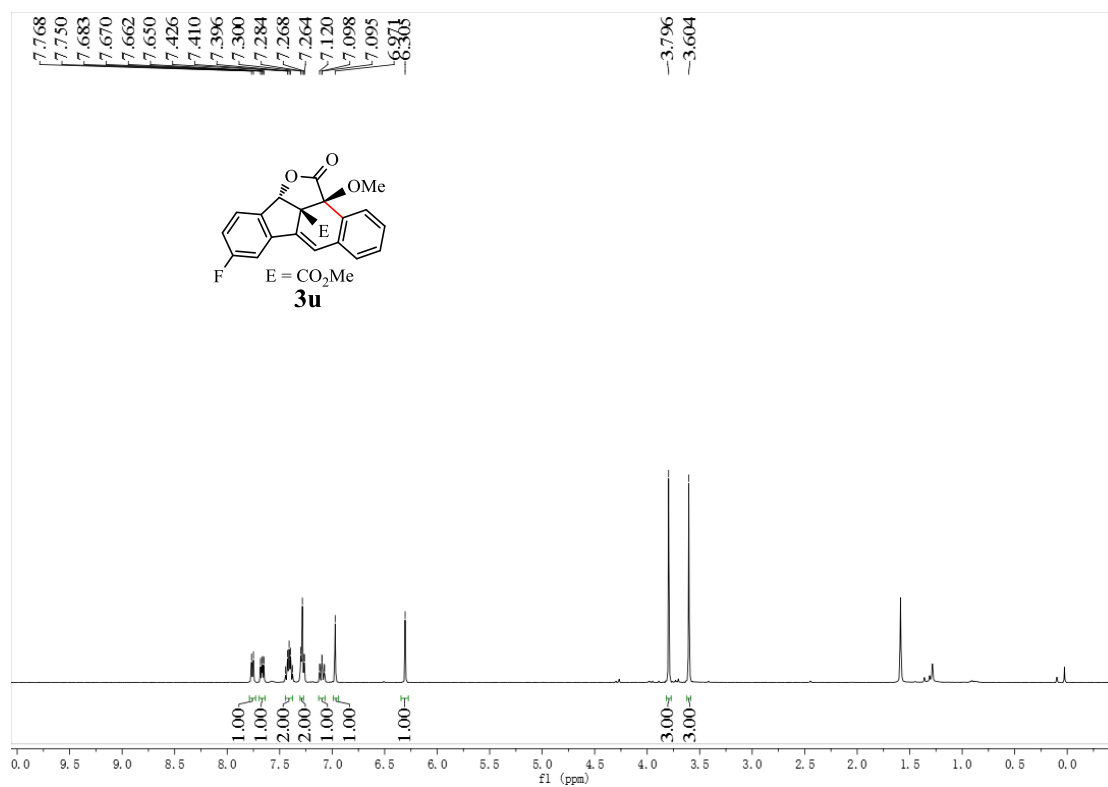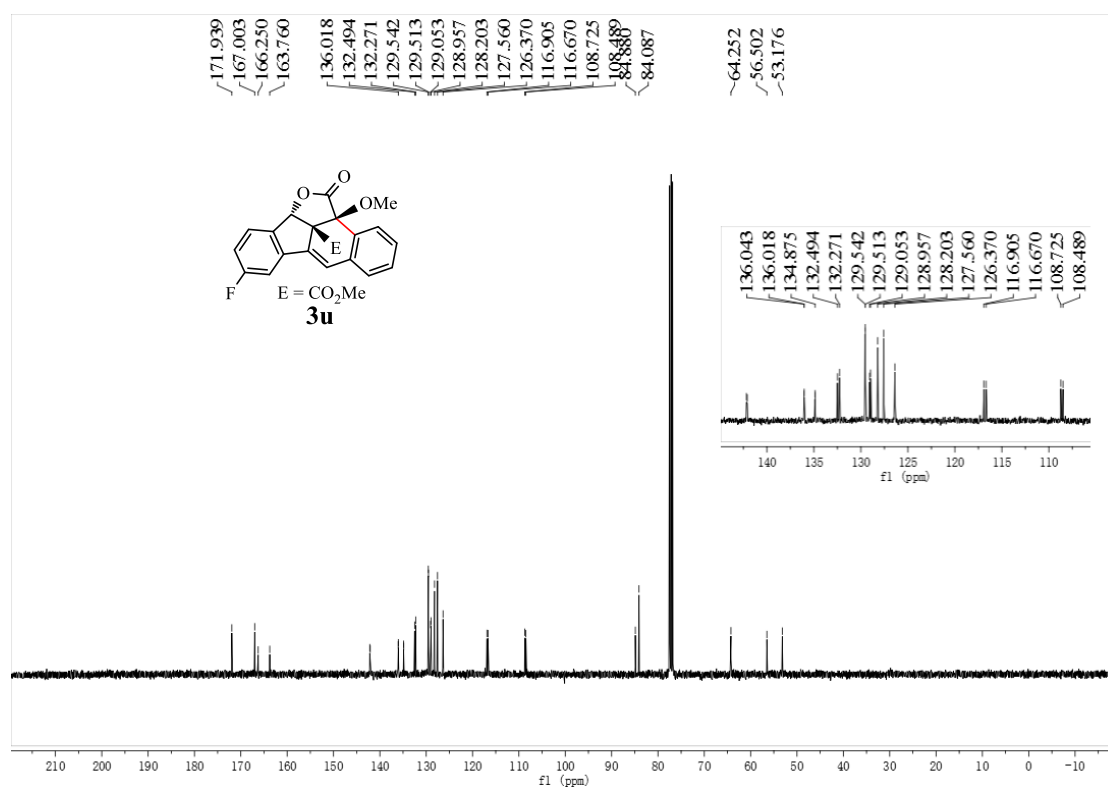

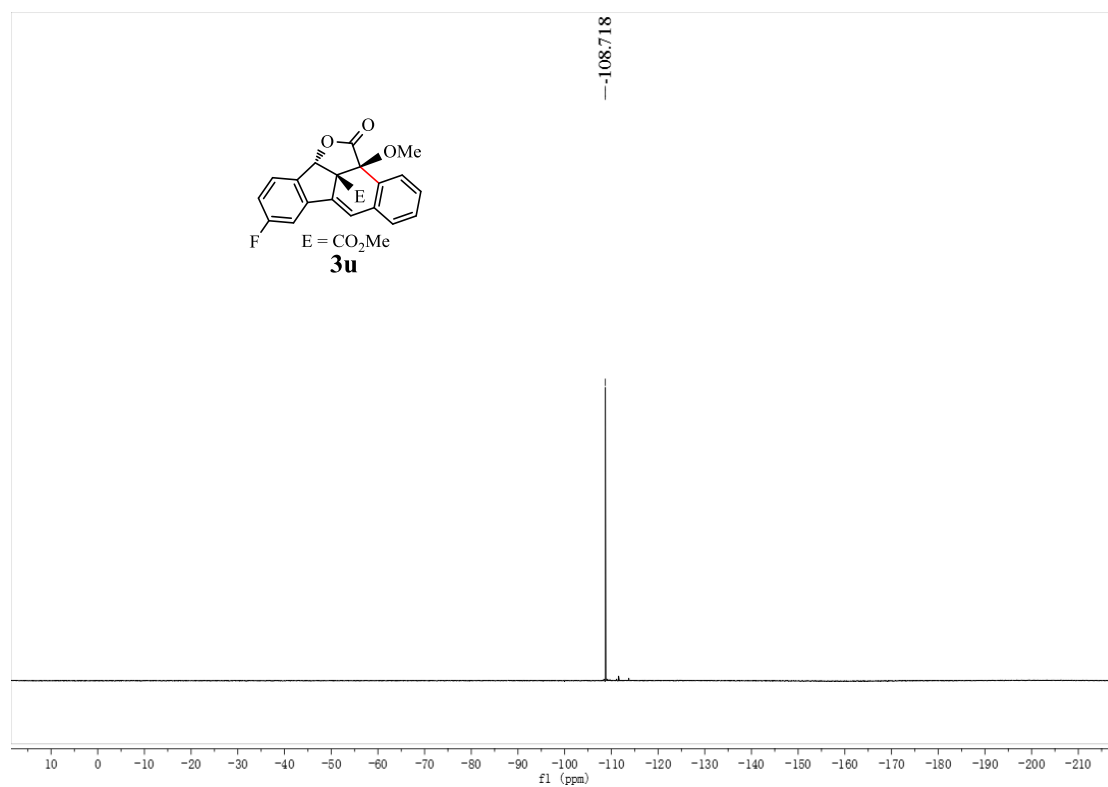

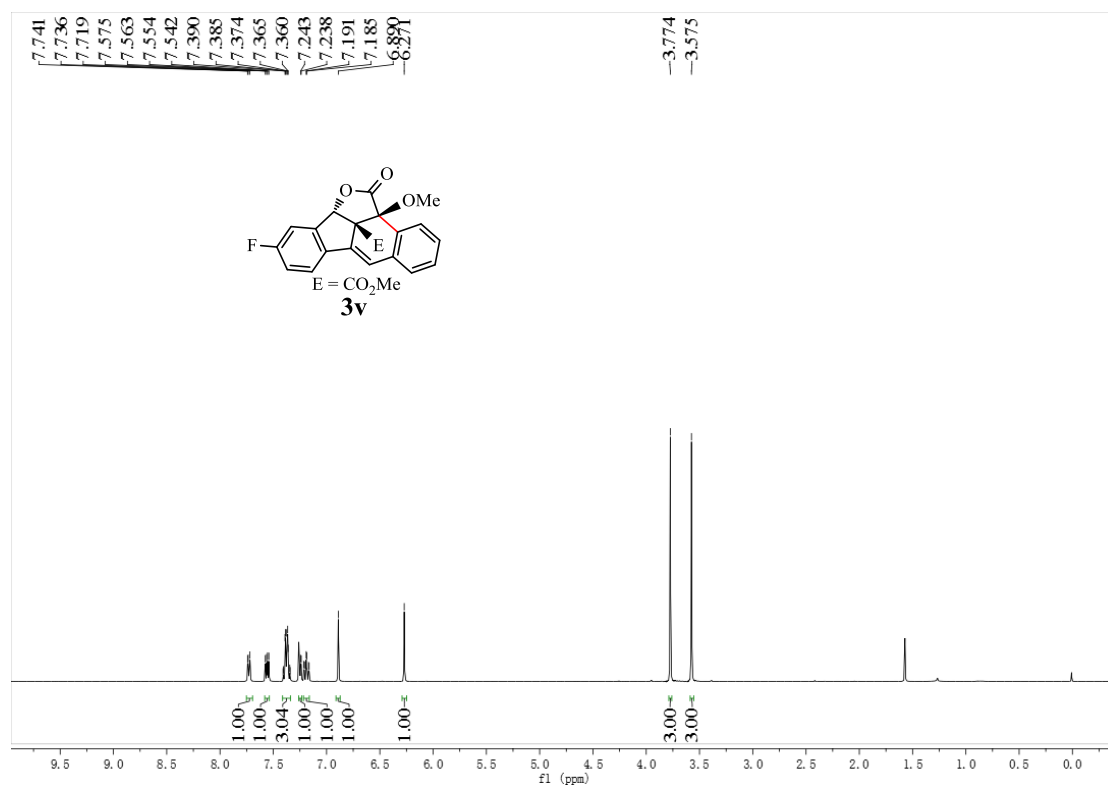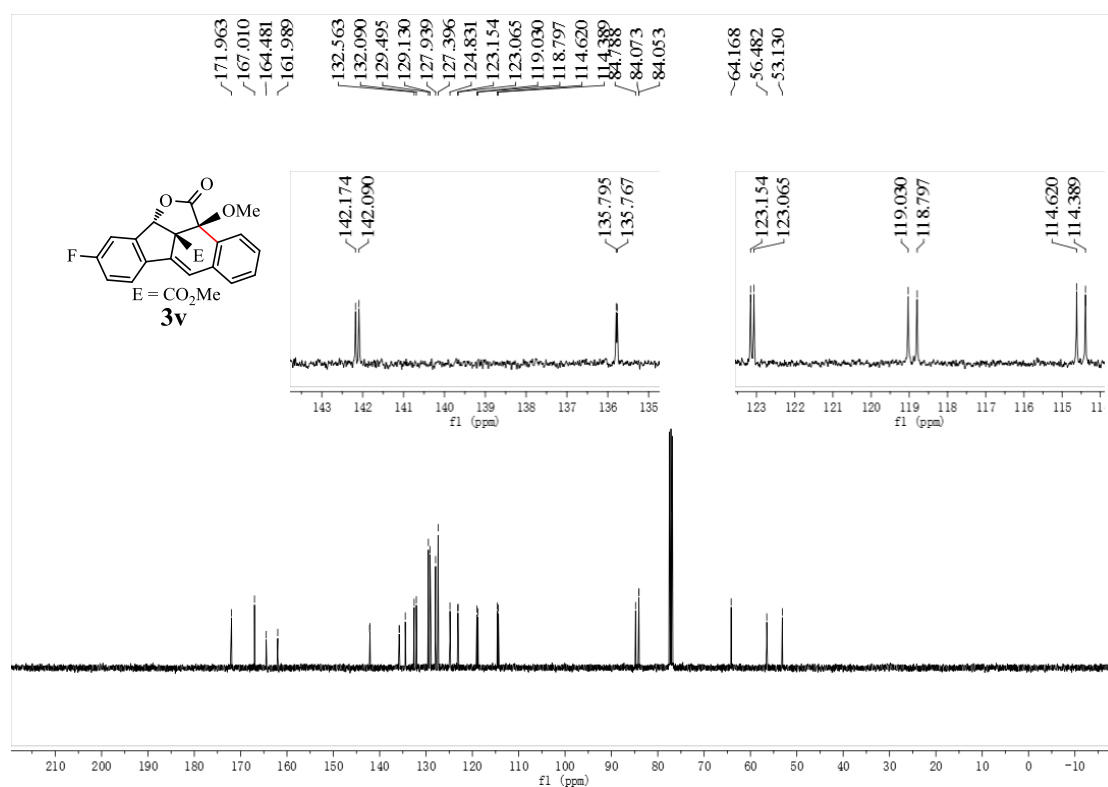

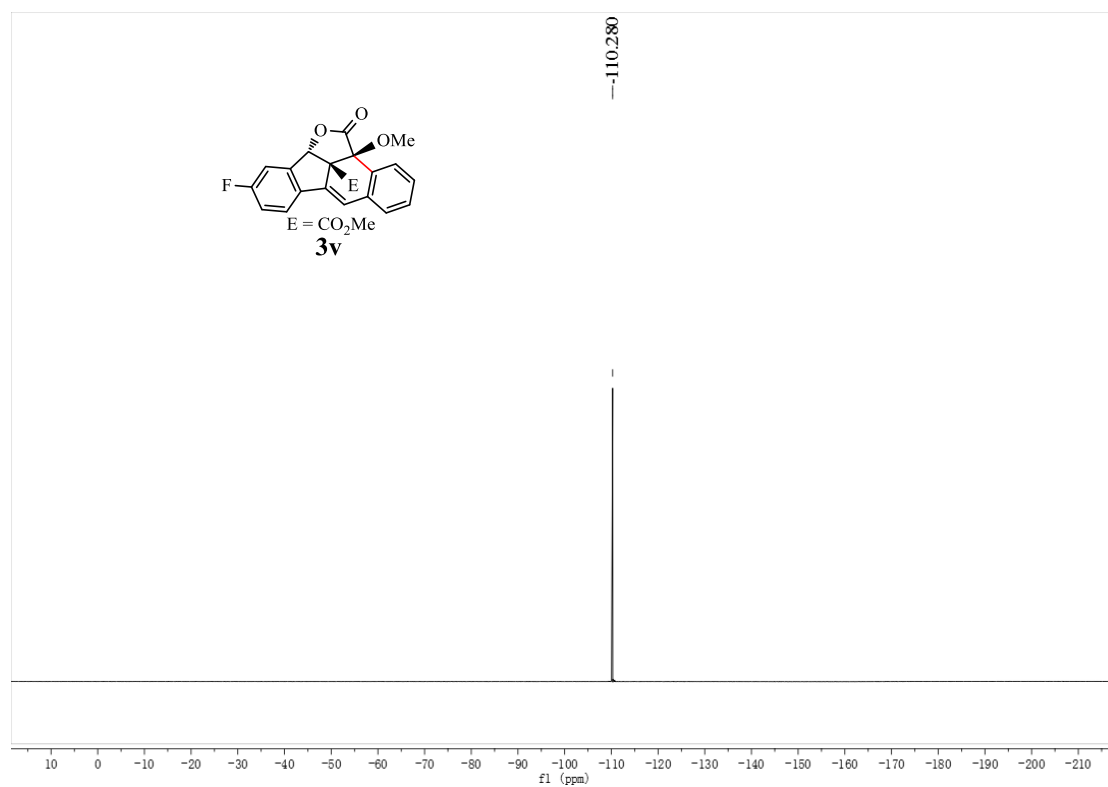

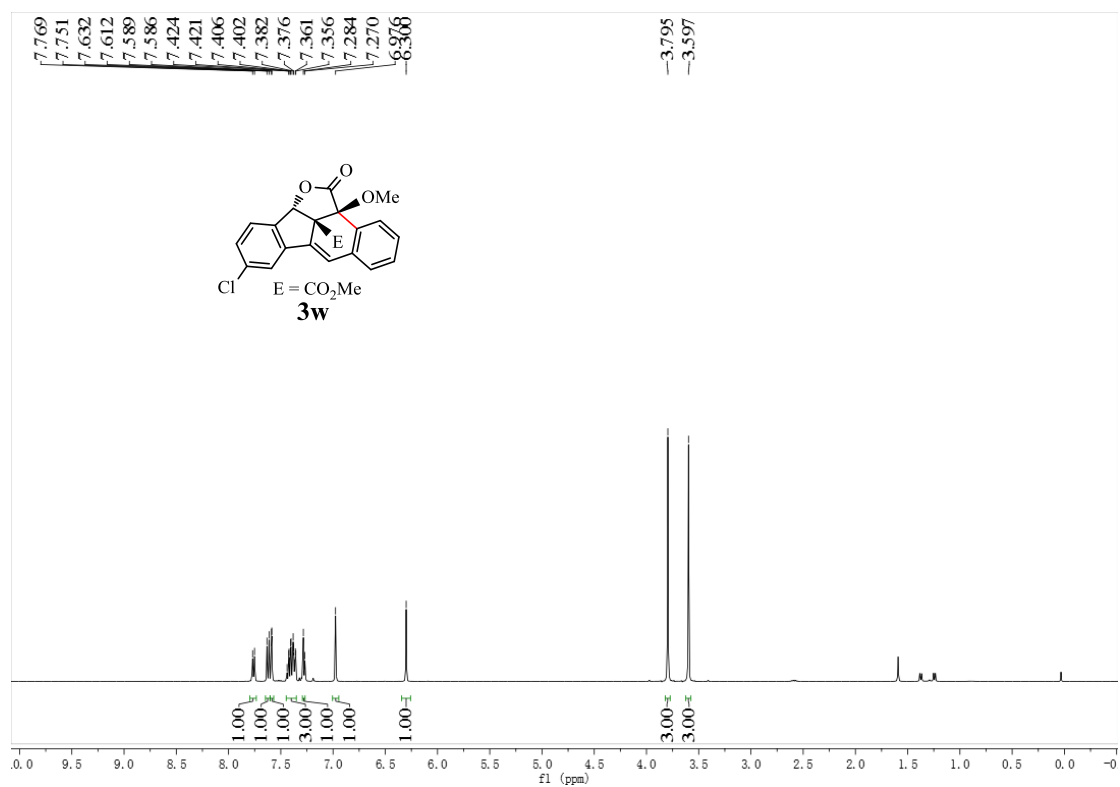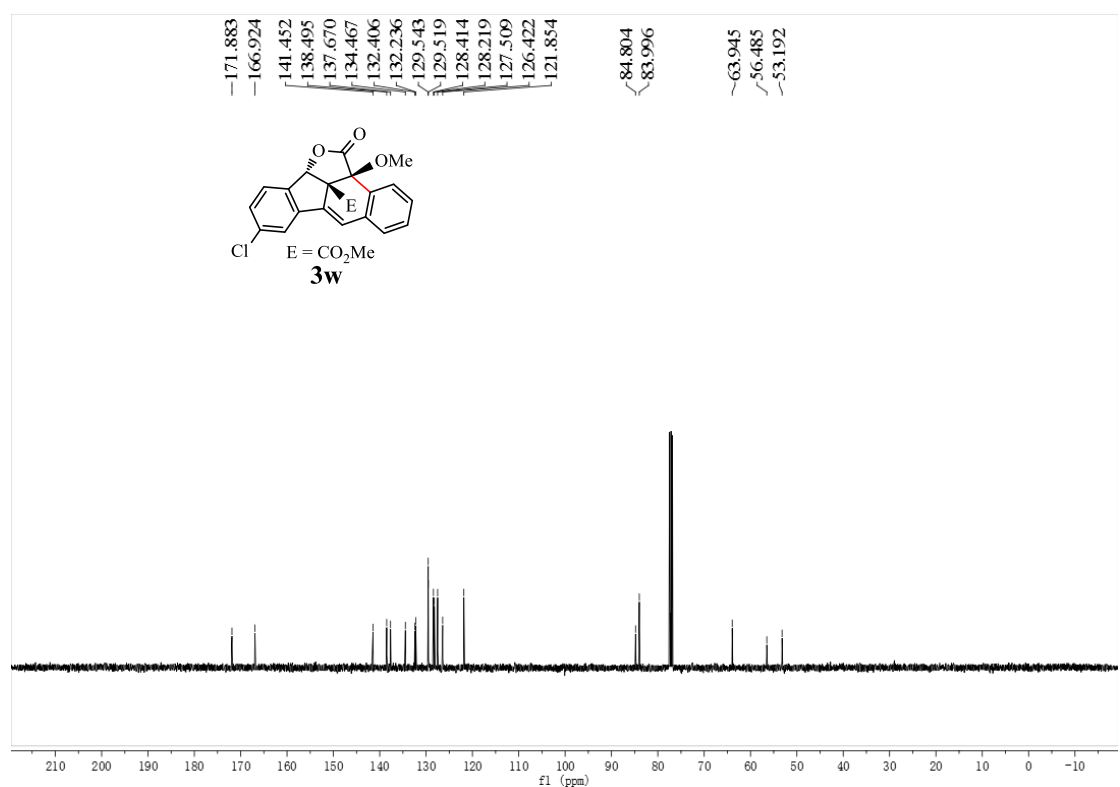

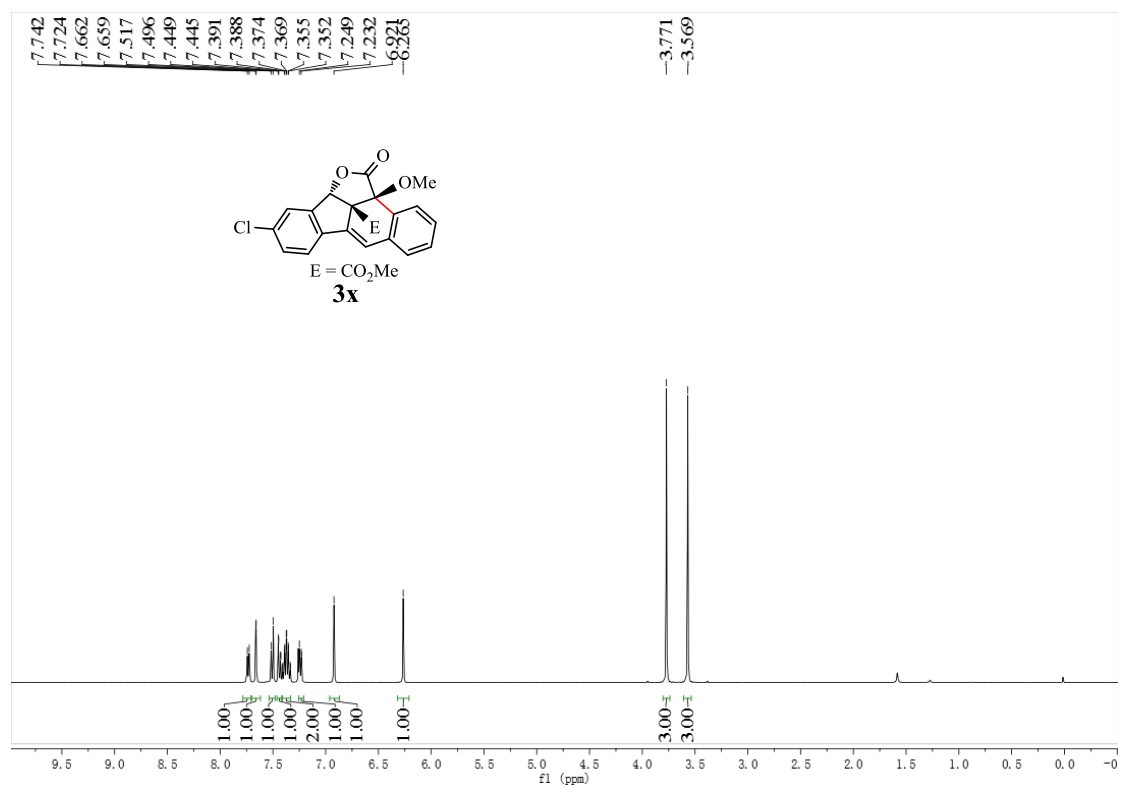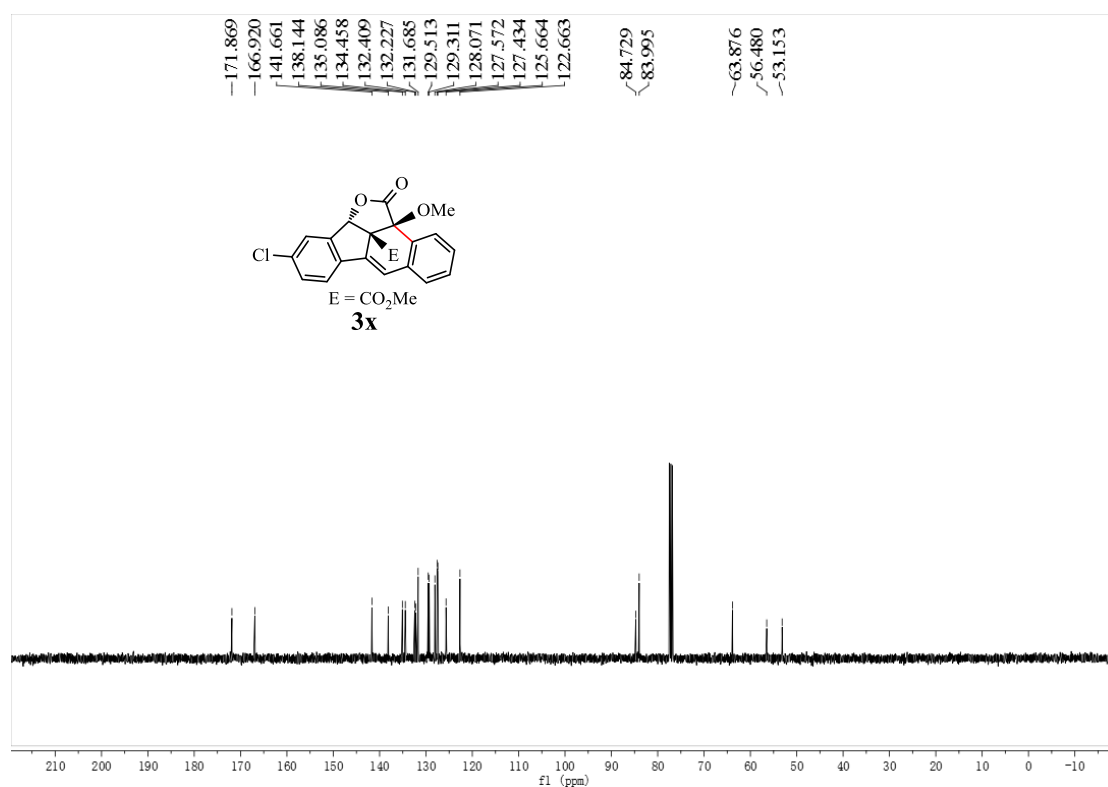

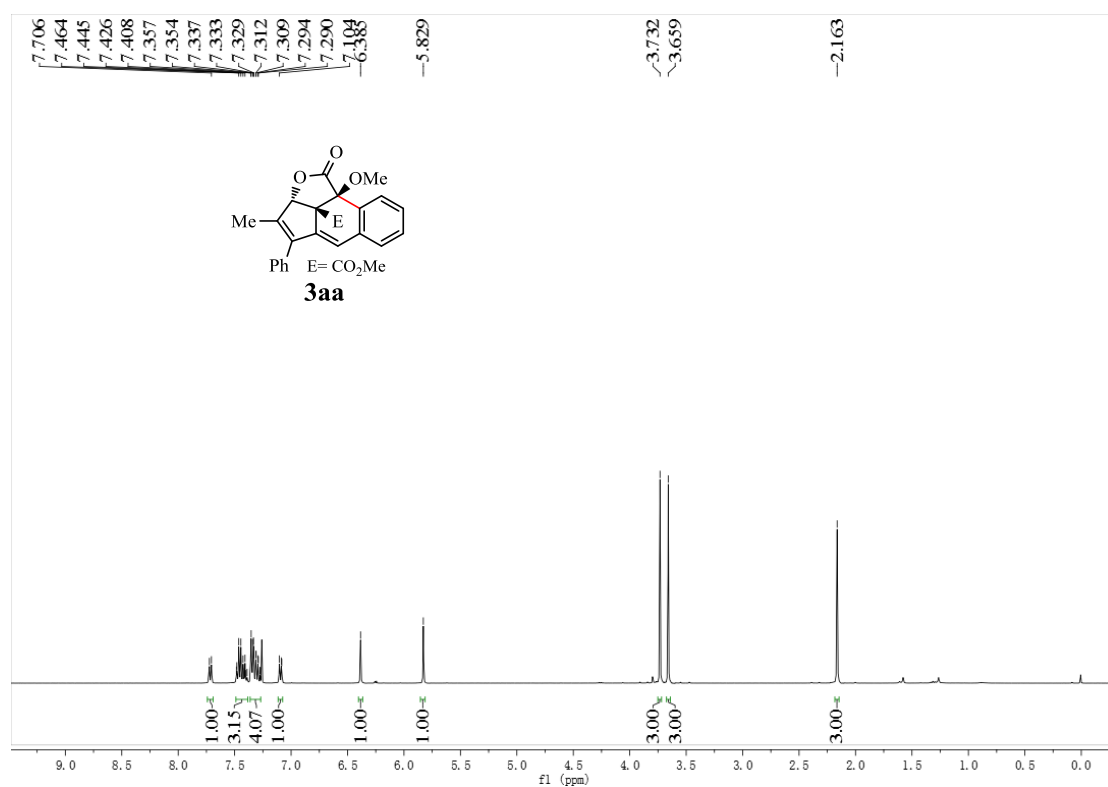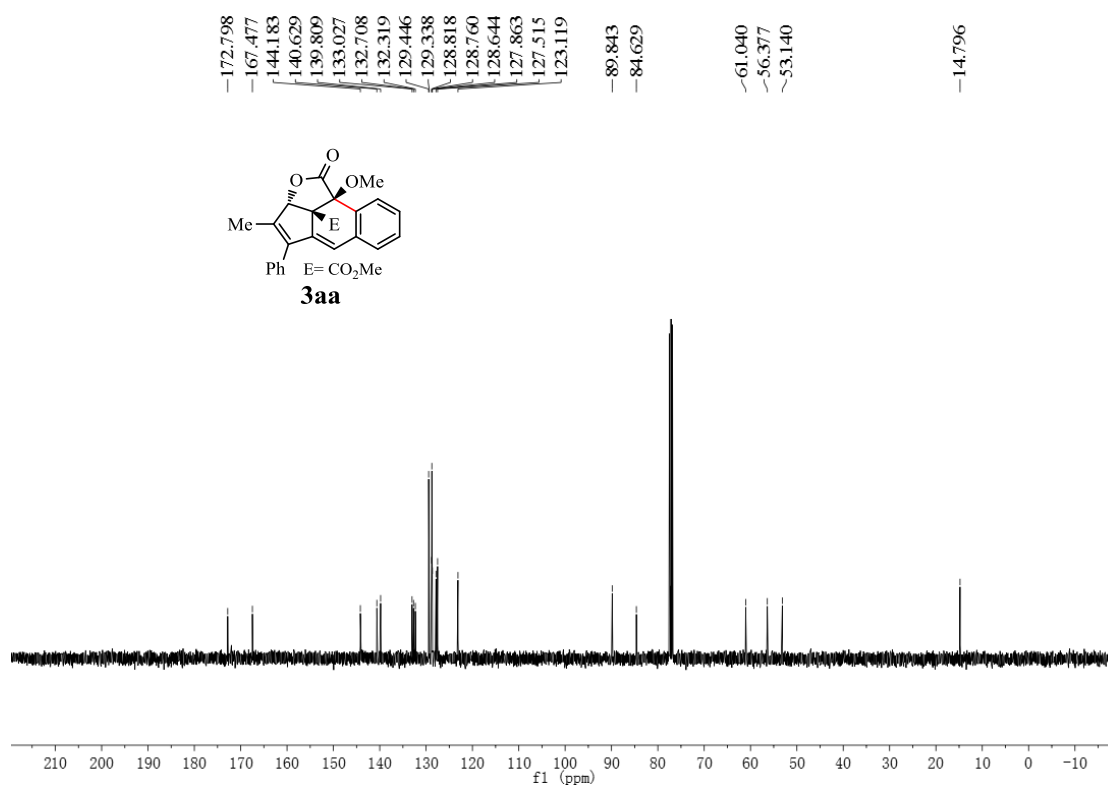

7.734  
7.716  
7.477  
7.460  
7.441  
7.421  
7.410  
7.403  
7.396  
7.385  
7.352  
7.349  
7.332  
7.322  
7.318  
7.303  
7.298  
7.293  
7.278  
7.275  
7.089  
7.072  
7.069  
6.377  
5.803  
4.165  
4.156  
4.147  
4.138  
4.121  
4.105  
4.096  
4.087  
4.078  
3.986  
3.968  
3.950  
3.932  
3.916  
3.900  
3.882  
3.864  
3.846  
2.154  
1.372  
1.355  
1.338  
1.101  
1.083  
1.065

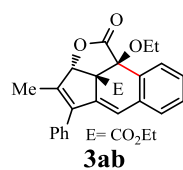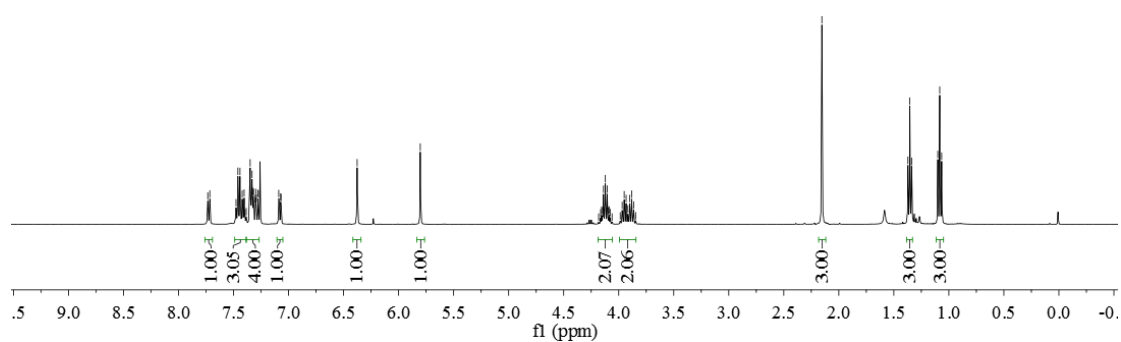

173.226  
166.903  
144.253  
140.784  
139.767  
133.150  
133.089  
132.456  
129.912  
129.426  
129.135  
128.736  
128.513  
127.651  
127.591  
123.037  
89.819  
84.155  
64.117  
61.823  
61.318  
15.726  
14.776  
14.028

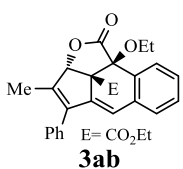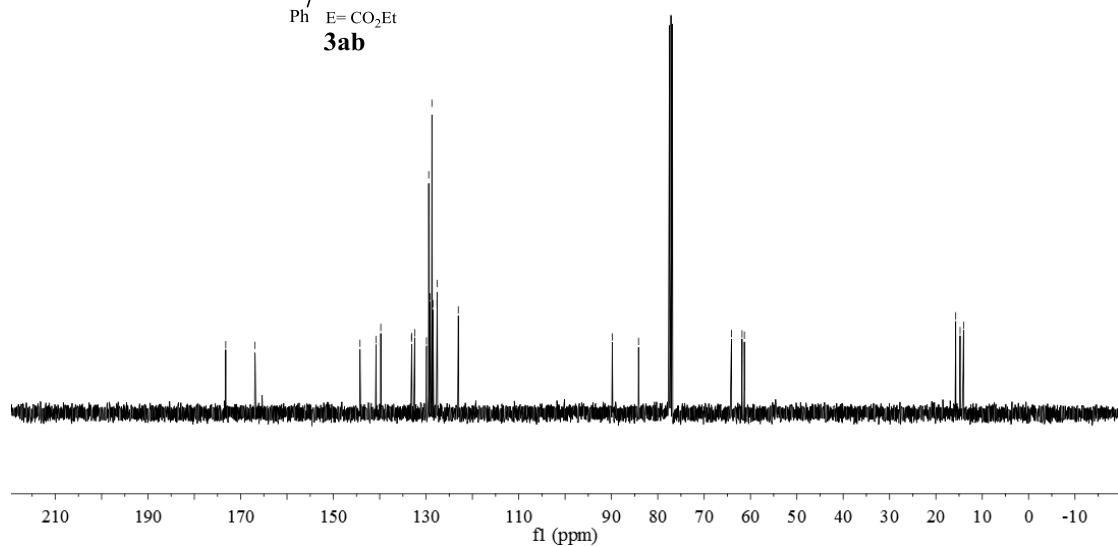

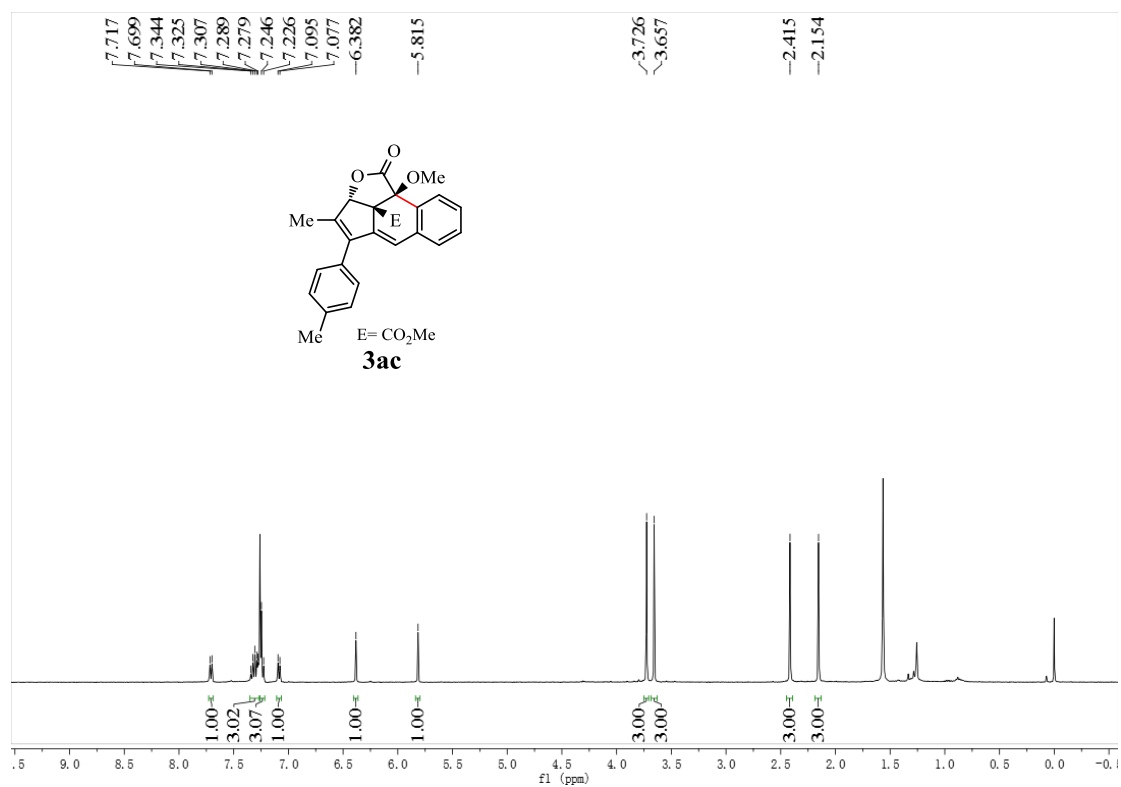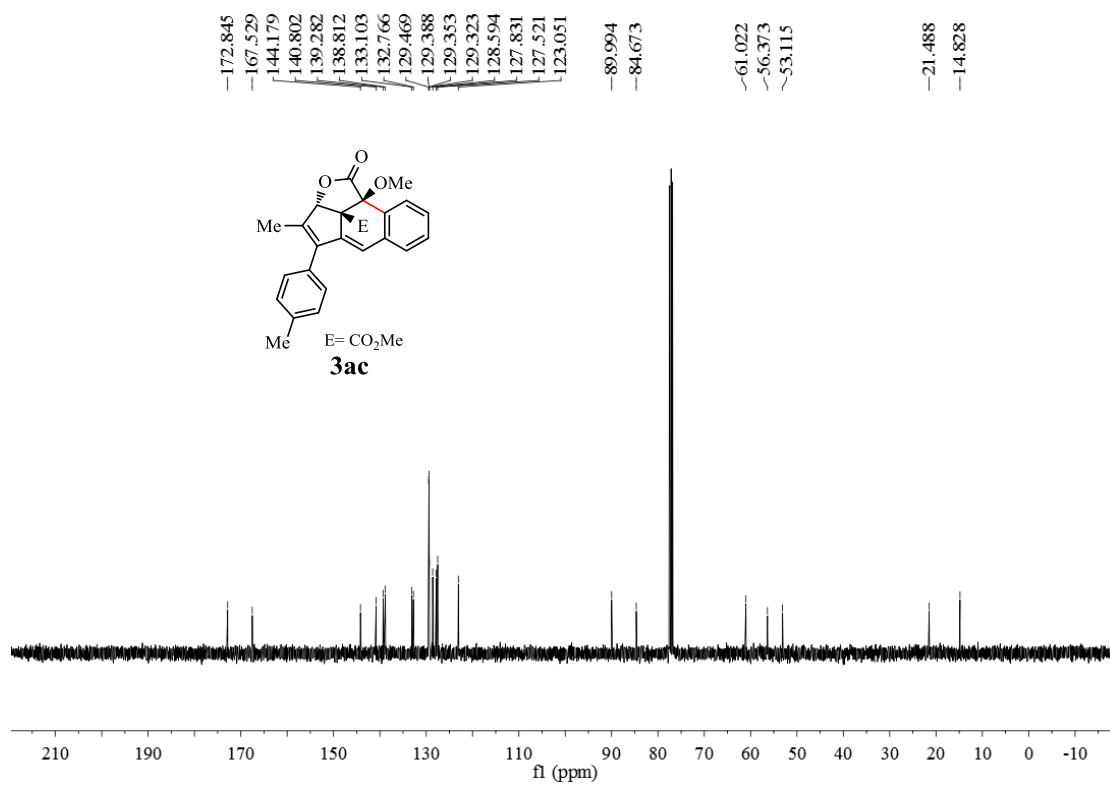

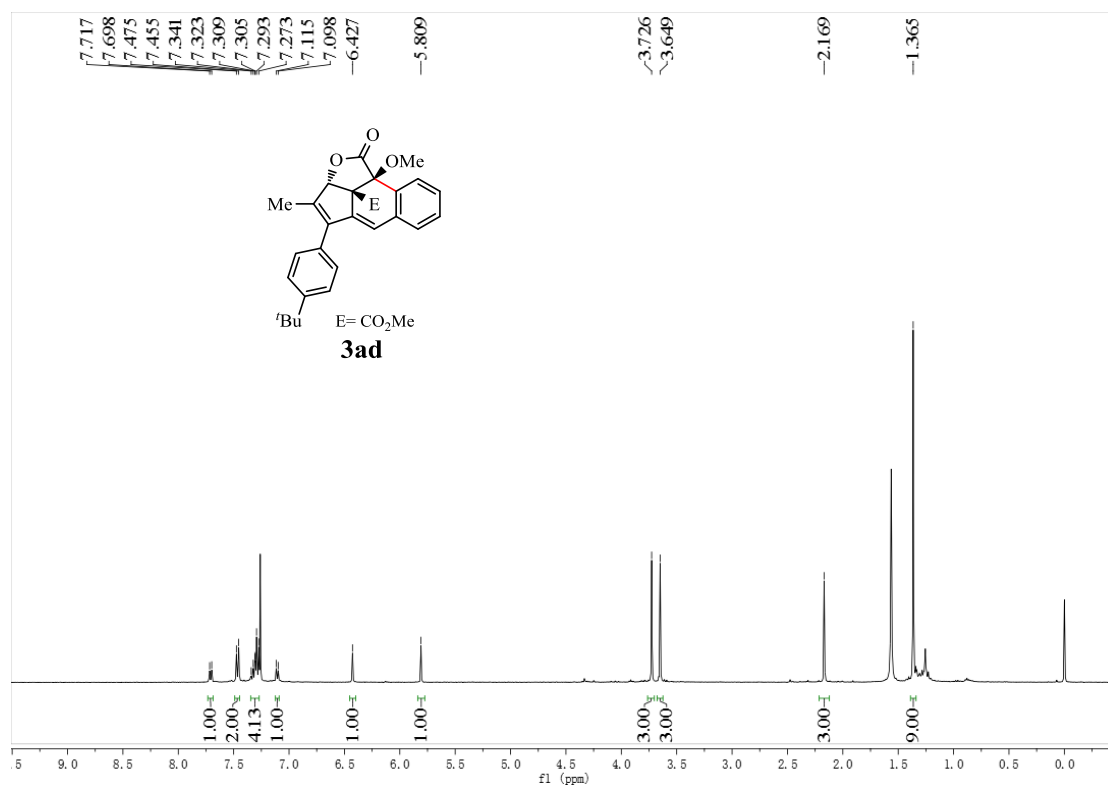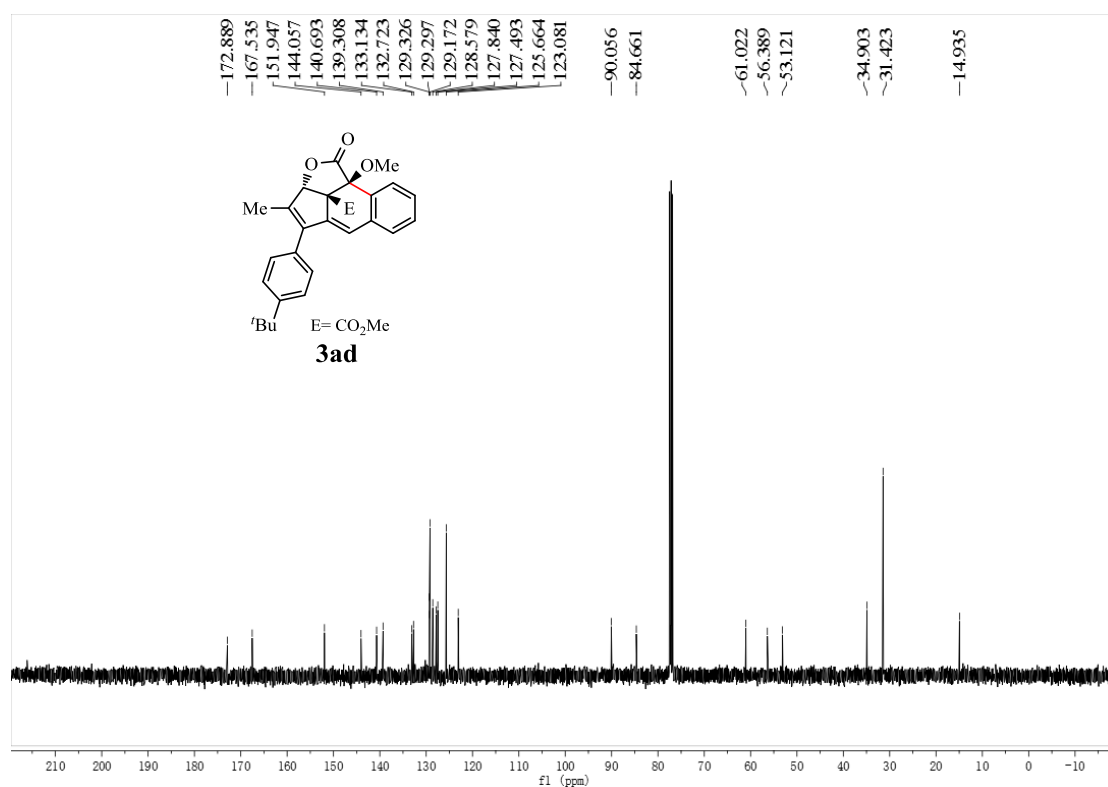

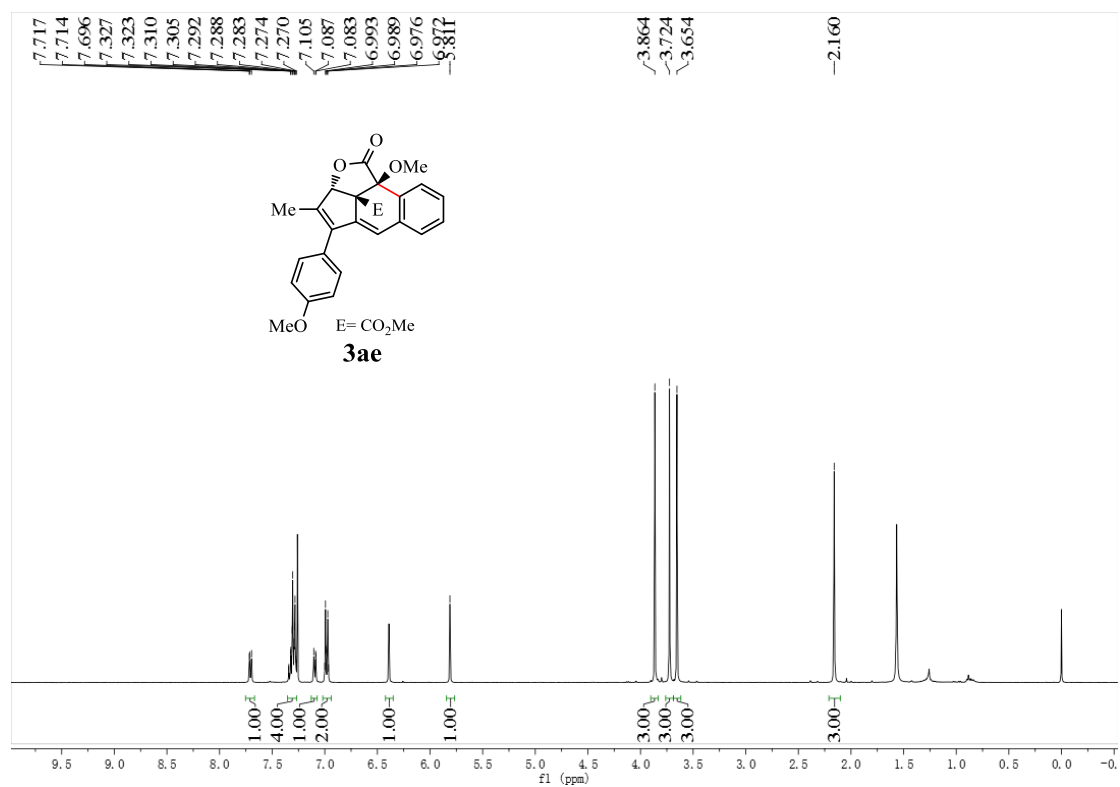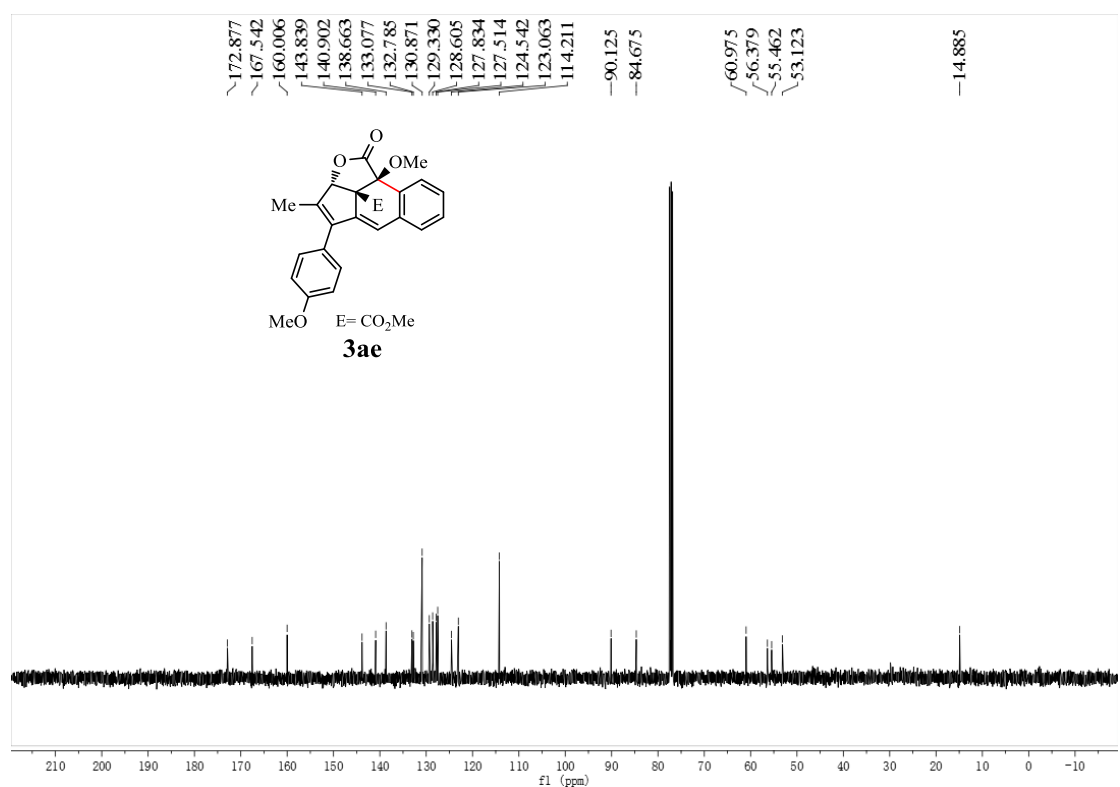

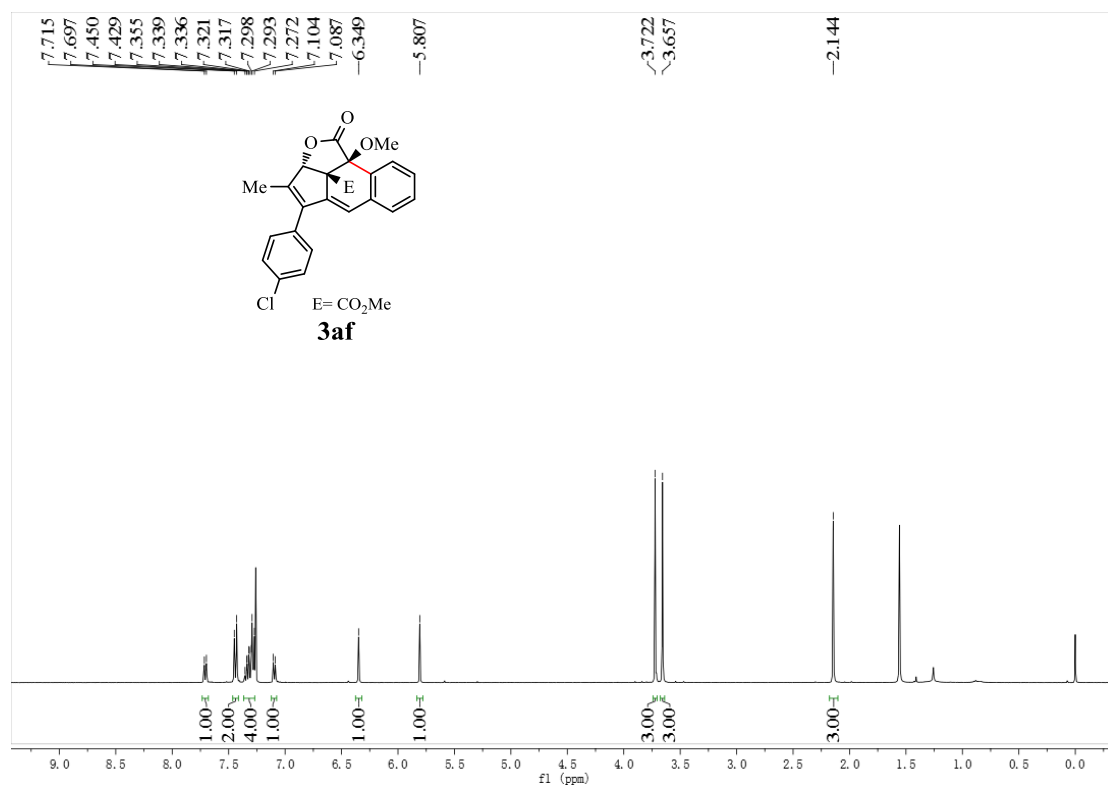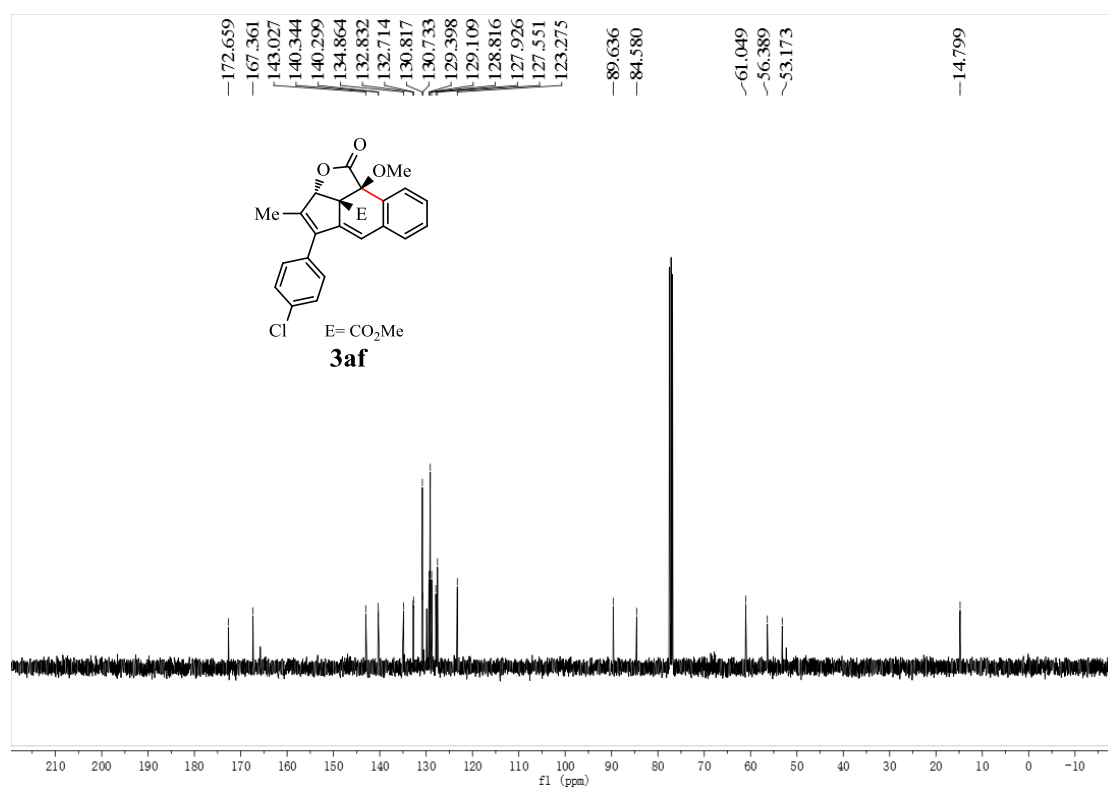

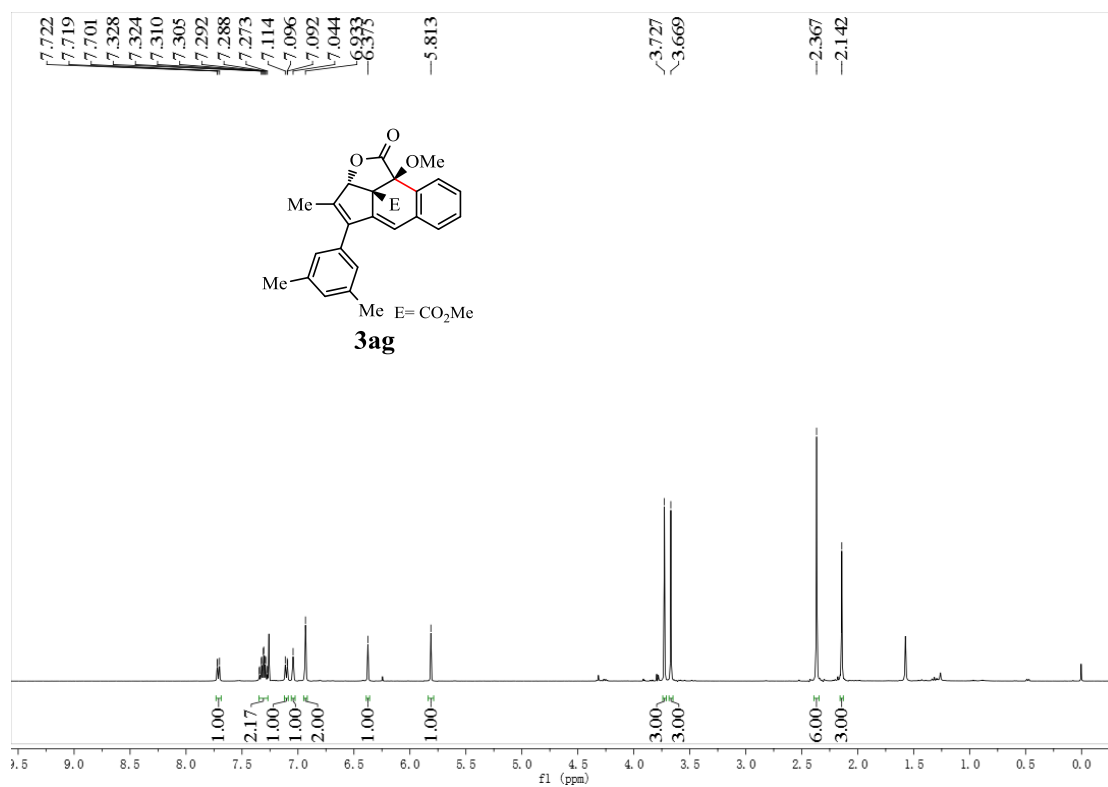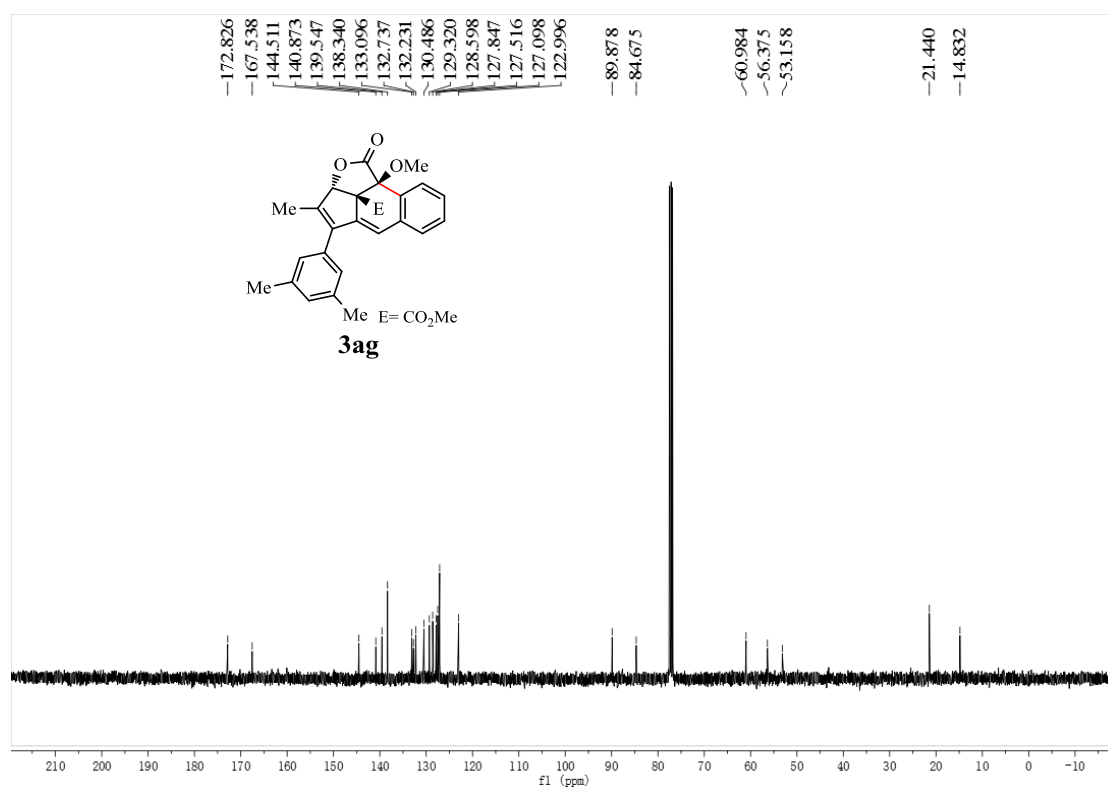

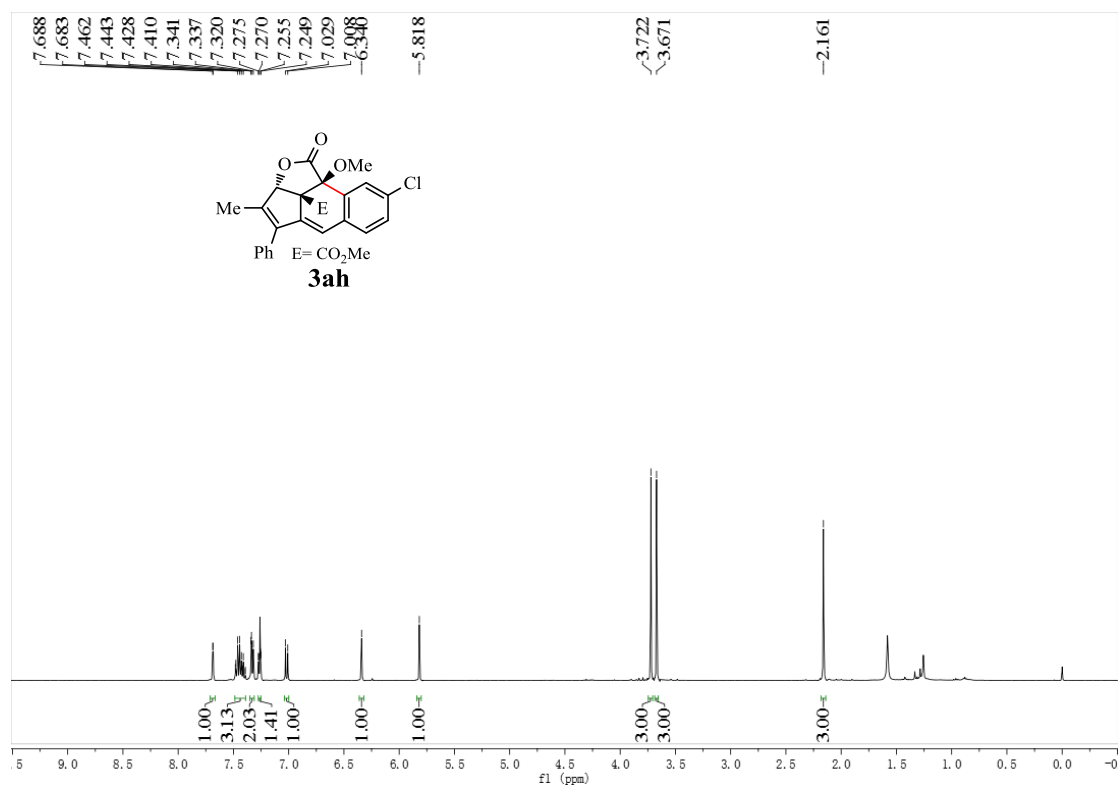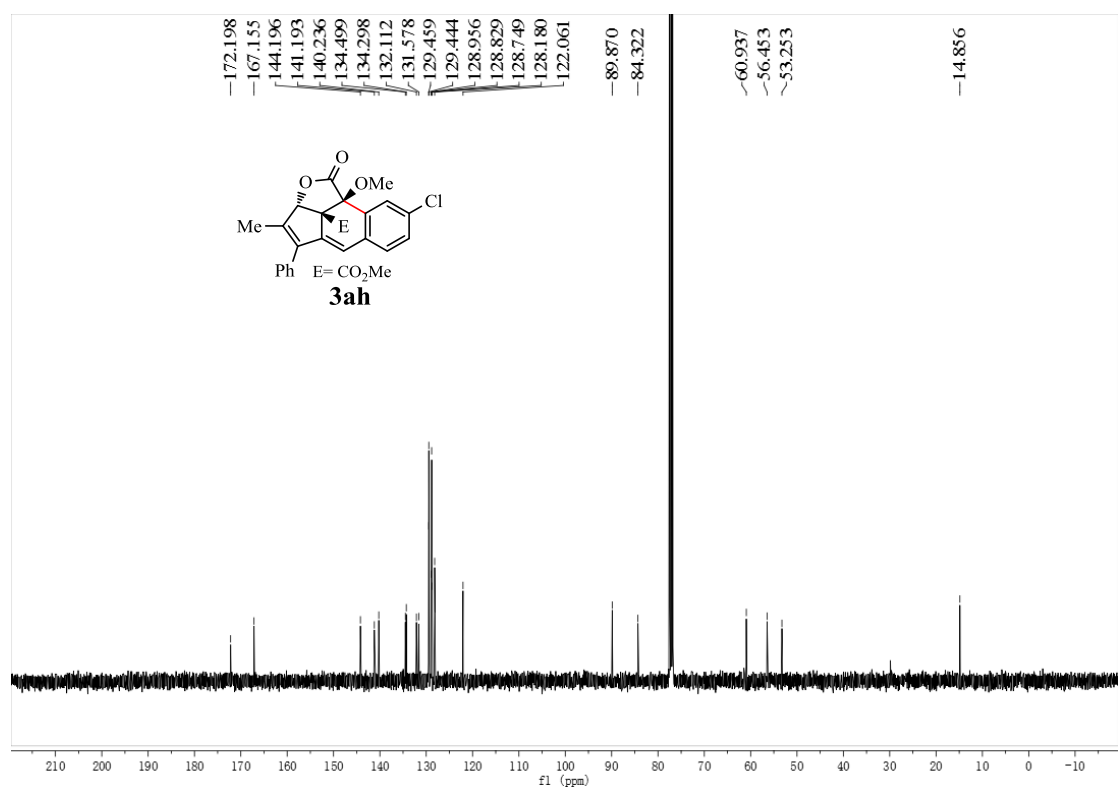

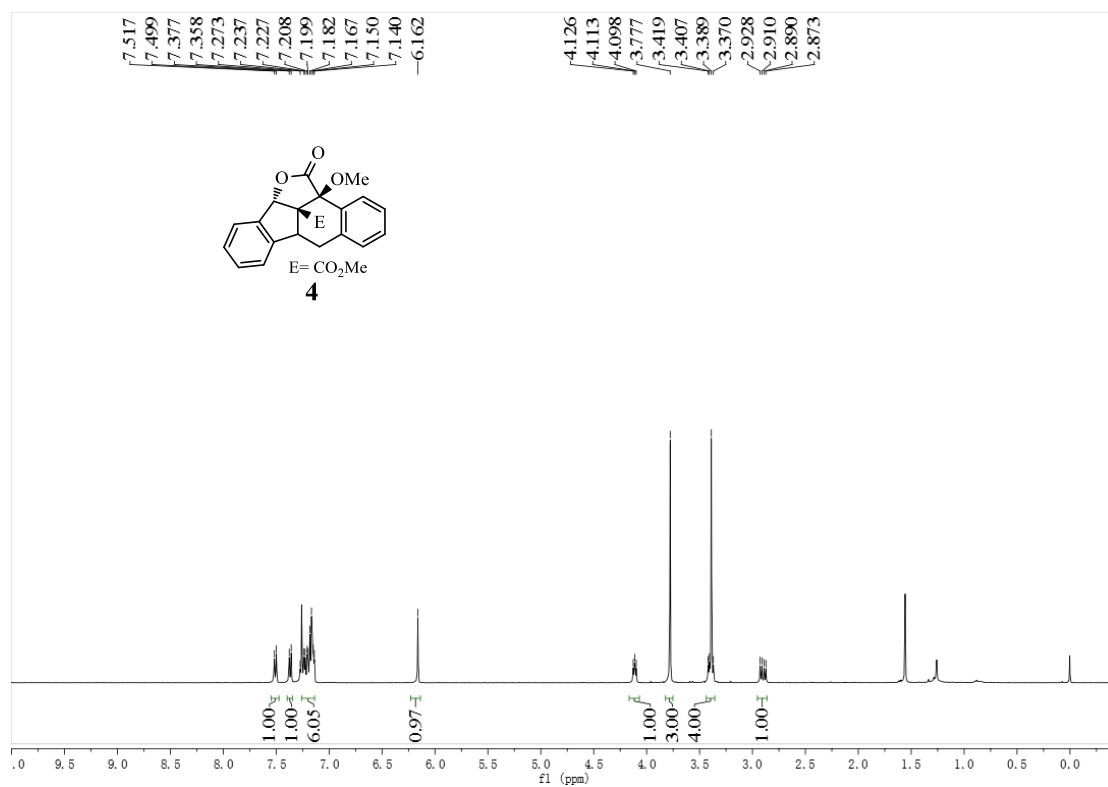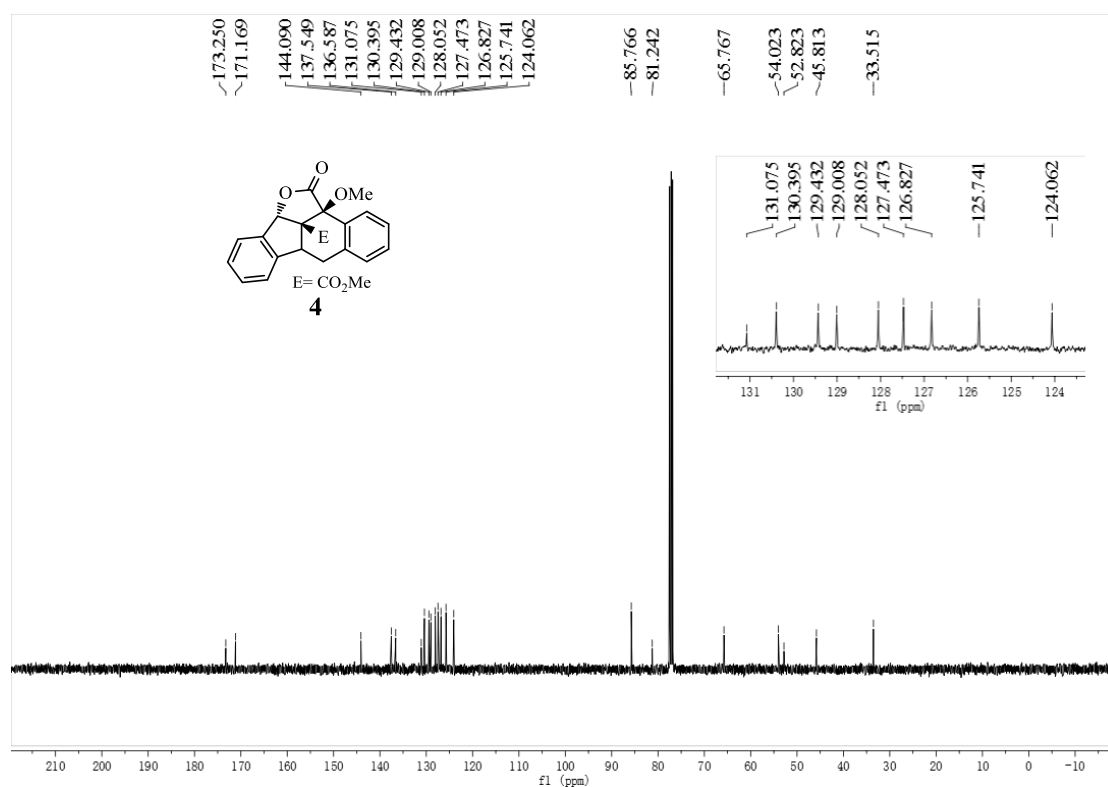

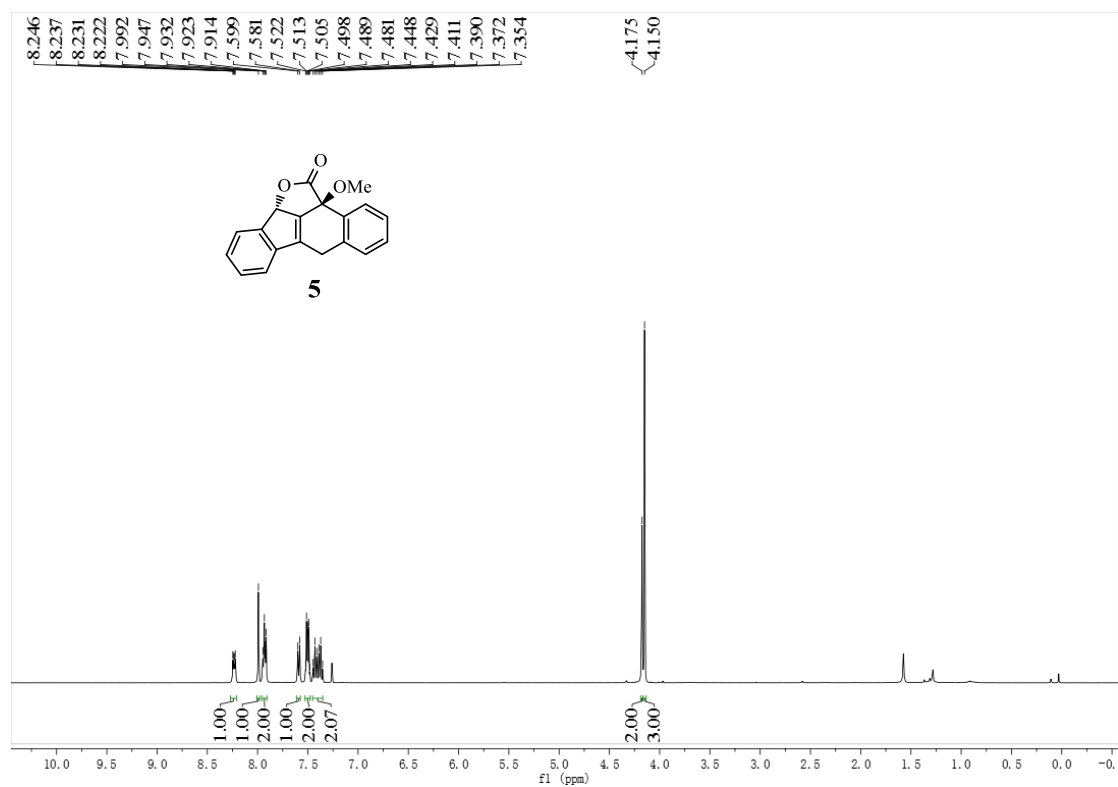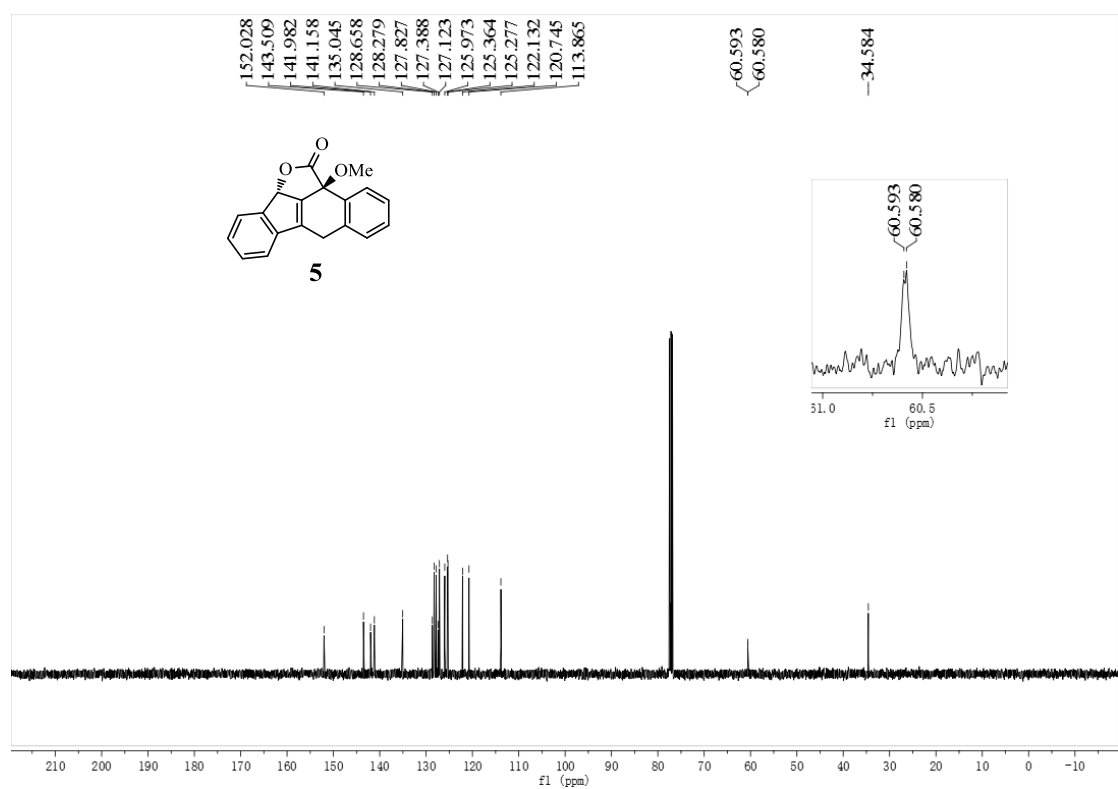

Supplement: c7cc09786g1.pdf [file c7cc09786g1.pdf]
